# Supplementary material
Source: PubMed Central journal article supplement (PMC5295771)

**ADDITIONAL SUPPLEMENTARY INFORMATION****Position dependent termination and widespread obligatory frameshifting in  
*Euplotes* translation.**

Alexei V. Lobanov<sup>1\*</sup>, Stephen M. Heaphy<sup>2\*</sup>, Anton A. Turanov<sup>1</sup>, Maxim V. Gerashchenko<sup>1</sup>, Sandra Pucciarelli<sup>3</sup>, Raghul R. Devaraj<sup>3</sup>, Fang Xie<sup>4</sup>, Vladislav A. Petyuk<sup>4</sup>, Richard D. Smith<sup>4</sup>, Lawrence A. Klobutcher<sup>5</sup>, John F. Atkins<sup>2</sup>, Cristina Miceli<sup>3</sup>, Dolph L. Hatfield<sup>6</sup>, Pavel V. Baranov<sup>2#</sup>, Vadim N. Gladyshev<sup>1#</sup>

<sup>1</sup>Division of Genetics, Department of Medicine, Brigham and Women's Hospital and Harvard Medical School, Boston, MA 02115, USA

<sup>2</sup>School of Biochemistry and Cell Biology, University College Cork, Cork, Ireland

<sup>3</sup>School of Biosciences and Biotechnology, University of Camerino, Camerino, MC, Italy

<sup>4</sup>Pacific Northwest National Laboratory, Richland, WA 99352, USA

<sup>5</sup>Department of Molecular Biology and Biophysics, University of Connecticut Health Center, Farmington, CT 06032, USA

<sup>6</sup>Molecular Biology of Selenium Section, Mouse Cancer Genetics Program, Center for Cancer Research, National Institutes of Health, Bethesda, MD 20892, USA

\* These authors contributed equally to this work

# Corresponding authors: Vadim N. Gladyshev ([vgladyshev@rics.bwh.harvard.edu](mailto:vgladyshev@rics.bwh.harvard.edu)) and Pavel V. Baranov ([p.baranov@ucc.ie](mailto:p.baranov@ucc.ie)).

## Table of content

|                                                                                                                                                 |    |
|-------------------------------------------------------------------------------------------------------------------------------------------------|----|
| Supplementary Table S1. <i>E. crassus</i> and <i>E. focardii</i> genome assemblies.                                                             | 3  |
| Supplementary Note 1. <i>E. crassus</i> proteins with recoded and frameshift sites identified by mass spectrometry analyses.                    | 4  |
| Supplementary Note 2. Executable analysis document supporting proteomics component.                                                             | 8  |
| Supplementary Note 3. Representative profiles of ribosome density mapped to <i>E. crassus</i> transcripts and supporting BLAST hits alignments. | 27 |
| Supplementary Note 4. IGV screenshots of ribo-seq reads alignments in the vicinity of selected frameshifting sites                              | 37 |

**Supplementary Table S1.** *E. crassus* and *E. focardii* genome assemblies.

| Species                  | Assembler      | Assembly size,<br>kbp | Number of<br>contigs | Number of<br>nanochromosomes* |
|--------------------------|----------------|-----------------------|----------------------|-------------------------------|
| <i>Euplotes focardii</i> | ABYSS          | 91,569                | 363,689              | 7,199                         |
|                          | <b>NEWBLER</b> | <b>94,015</b>         | <b>109,492</b>       | <b>12,922</b>                 |
|                          | SOAP           | 200,640               | 1,144,956            | 4                             |
|                          | SSAKE          | 118,465               | 374,877              | 8,879                         |
|                          | VELVET         | 114,730               | 301,971              | 4,996                         |
| <i>Euplotes crassus</i>  | CELERA         | 19,350                | 12,326               | 247                           |
|                          | <b>NEWBLER</b> | <b>59,563</b>         | <b>56,588</b>        | <b>14,194</b>                 |
|                          | PCAP           | 64,474                | 70,328               | 8,097                         |

\* Contigs containing both telomeric caps were designated as nanochromosomes. The assemblies shown in bold were used for further analyses.

## Supplementary Note 1. *E. crassus* proteins with recoded and frameshift sites identified by mass spectrometry analyses.

a. Five out of nine selenoproteins (encoded by genes with UGA codon reassigned to code for selenocysteine) were detected by whole lysate high-throughput MS/MS analysis. Selenocysteine is shown in red. Sequences of the identified peptides are highlighted in yellow.

>eTR1  
 MDYSDTPQEESTHSYDYDLFVIGGGSSGLACAKVAQEAGAKVAVADVFVKPTPKGTTKWKVGGTCVNVGCI PKKLMHYSALLGNSYHDQVE  
 SGWEHEKPSHDWGKMITNVNNHIRGINFGYKADMRKRGIKFHEKFASFVDPHTVQLVDKKGKTEMITSNYFVIATGGRPLYPDIPGAKE  
 HAITSDDI FWMKDNPGKTLVVGASYVALEcAGFLHHFGNEVSVCVRSIFLRGFDQDMAQKIAKDMELSGINFIRDSVPTKIEKDEETGK  
 LTcFLTVGGEEETTVEVDTVLFAGRYAVTADLNLGNAGLIAEKNGKFITDKYQKTNVDNIYAI GDVHLHGKLELTPTAIQAGRI LADRLE  
 AGGTTTMDFYDVPTTIFTPLEYGcVGYSEEDAREEYGDFIKVYHTYFQPLEWNFAKSIYKERNcYVKIIVNTADNDRVIGFHILCPNAG  
 EITQGI AIAIKVGVTKPQLDNCVGIHPTIAEEMTNLHIDKADNPDPKSDCUS

>eP22  
 MESSDDKVGCVQSILVVLEGLNDDSSIITGLEILIKLIKNIKSPHEEKFRNIKKTNKAISTKLLSLSGIEDLILALGYKDDNDEFYVF  
 DIDKYS DLYKLRKRAIQEFHDEKRKMYMTPPELEKFEILQEQRKFYEDNKKKAKARKDLENGMKFDREKNQEEIKSSKANHLNFGANV  
 VKFQPPAPASRUG

>eSelW2  
 MDSTTKGHIVVNYCGGUGYLPKARYVQEAVERNRFPGDFSFDLKA DVGKTGRLEVTVFVGGDDTEGKLVHSHKDKGQGFVKDSNVDSVLDSI  
 AALLE

>eGPx1  
 MGAALCFKKRKEKLETTVESLFEISAEDIDGQEHLLADLAKDKK CIMVVNVASKUGLTKTHYTQMVKIHNKYKDKGFEIFAFPCNQFLS  
 QEPGSNEDIKKFAREKYGAEFQLFSKIDVNGPNTHEVFRFCRRHSPLYDDETDTIQNI PWNFAKFLIDEEGNVVNYSPKSNPDCVPM  
 IEEMLGL

>eGPx2  
 MGQVFFKSKKEKLATTVKSLFEISAKDIDGQTHLLADLAEGRKCTMVVNVASKUGLTKTHYQMVKIHNKYRDRHGFEIFAFPCNQFMSQ  
 EPGTHEQIKKFAQE KYGAEFPLFSKVDVNGPDTHEVFKFCR RHSPLYDAEKDVVQNI PWNFAKFLIDE KGQVVEYYTPKQNPDLQVPMKI  
 EEMLGL

b. Sequences of proteins predicted to contain frameshifting. Sites of frameshifting are shown with an exclamation point highlighted in red. Sequences of the identified peptides are highlighted in yellow.

>comp7880\_c0\_seq1 AAATAA  
 MDNIPDYLVLRNLTGTSFLDRREEILSIEYNSIFTFAEFKMEACRTLVRVYDPKCRFLDFKEGIETFEDDLNMLKSHDVLVYLASRGEDFDY  
 SSVLNDYDRKDVLEGGGFGKVYHAVNRETGEDVAIKFMDISHYLTADQIEEYIYREADALQKLNHSHIISLHKAQVQRKEVILIMEYAG  
 GGELKDRVEEMKDMDEIYARFIFQQIC SAMS YCHNRGLIHRDLKLENVLFKEKGGMI IKIVDFGIAGVCKPQEKEKTDSGTLSYMPPEV  
 LSGEKLEAGPGIDIWALGVMLYTM IYGKLPFYGDTEDEI INCI IKKKPSFKDKKTI SKELKDLLIKVLNKDSDKRLSMFDLQNHKWMEM  
 QDEEILKSIEESKLEQE QEEKKINEEDELIAFDKLNKDDKSSKAGSDYNSLSAHSNPNSSGGRKKKKMRGSSPRSGMNGTGKKKKKT  
 IKKKAT

>comp8353\_c0\_seq1 AAATAA  
 KKAHAVFNGGVTALCFSKKRRTLYTAGGDGTFVLPVPGAKPNPNQSV EPADFFSSPDL SNIPQIDNETDDSVKYYKELLQE QFLDSEIP  
 RKKEFKAEISKELEDIRSHIVDLVEDNRKAQEIEQLERHEFVIDVKKQSMEQDGWQQRQLITKQAKRKQLEYECLKERVKSATWSTME  
 THSTACISLSDSLLLLNYGIRL RTPLEKKT LNRVLFHFRMELRQQITGMETRANKILDQSLFSNHDETYIMNRIRGVQHYEVDEEAPII  
 TQAKSATKRKNKIAQQEASKSTADGALKKGRKPKVDLNFRLGANKPKLLDEDDFDKLDRAQNRDESNI AELRWKIVTKKKELEDL  
 KKDIHILGSDWLLYEPSDLYTDGRKKMQIEMLDVVFALKQEYNKEFERFQRKDDQIFAIQERSNRITEILEDLKREEELFHPRTHPL  
 ETPASILEVKPEEVTVQKYLTAERAVEDEKHRIEQERLKALEGDVNGVQRGIKNMLGGTYELKKNKGIMEETLEREEWMSKPIEDMTED  
 EKLFKFEFQQREKELQE EKDKRKAWDQELKKNRIEIEEICFKFEDELKKIHKRLYYDMRVYEQELYIIRLTLMLHENKEIKQEAL I  
 AEKKDKLEQELVESKNTINNFQRM YEDFDSEFKASSAIAEQEKGLRDLFPNAPFRQILAFVVRNGGKAANRARGFRGQTEENTLEQEALA

LLCKLDPYIIVDENAVKAKFEQENVKEEYSYDRDKIVNLTPEGFDTLVQERENRNKIDKERKGMEOEIANLSGHKEFCEINANDLEEAY  
 EDIKASHTIEIESRMEKLYNFEAVVYMLQGQVEVAQAPVATDYKDAILVNTGVIEDENKKVVQEGNTNVK KLEEITKFKRKLNHETWK  
 NDKLKLEIKDLLERAIDVQLYKVTKDTQEIIKGNHRTKDEDEKKRLEDQINNLOENAGARIEVINKKKKLRKEINEKRKENNELETRA  
 RDLQTNVDQRNLIIDLR SKGPSGGGDDRLQDPIKR FKEVATVRKYKEIVDQQKEEIEFLEDELERFRSRTFSPFANMHARQDYAD

>comp7194\_c0\_seq1 AAATAG

MDTDLIDQIQKNMDQDPQLKDLFEPSSSEENSQNDHGFTQGSKKFYSQDSAMAPPKVSRSKER ELAFLK RAQEI GLEPYNEYHGKKKTM  
 IKKQTPGKDLIFSNIRHKESTSQQRRDHASRDEQQLSNKSLALKTGTNKEKIQKHKLHQSQRTVGGKTFECKEAKPSNGVAQKRVEVIE  
 ISSKTSSSGNYSTPIESCPIIENCPSVESCPPVDHKTHEVVSLDSSNSDDKNIDDQPLNPKQKRRDKKKEQVDAKNARDFDSNPPKKS  
 MVSSTPTVNSEVMDKYLQQTTPDQIEIVEFDSRPKWPTENCNSFQDQLKLMASQRKRKADTLGSNMFOEMKSTLSNIEASMDSPOGPI  
 QKEYIHLKESIYPFWQSTFHHLEWDDSDANKIKSREELKERMLDSLQYFSGHKLYRYADPADVVRKGLLQNYPFVEDSDSKTEVKLLEG  
 KFHMLKIIVDGITKKIRVSI IKKDF

>comp2566\_c0\_seq1 AAATAA

MWGRKKAEPKKSETKKRAPAKKATGTRKTKPPAKAKFSKLESKEEVKEEIKHDSSETIFKVYATDQEMGRPIIGSEGIQNLASDLKLDI  
 ASSAELIVFMWHCECEEYGOISKSEFQKGC DK LGVKDFSHFK KSVPKLSATLAMQDTPKEFRPFYKFAFTFHRTDGKNVPVETCQVL  
 FGLIFSDKYPILKTFKFLAEKEVTHLTLTDQWDSTYDLIRENPENLDNYDEYAAWPTLMDDFYQWYGENK

>comp6054\_c0\_seq1 AAATAA

MEDEKNESI QNFKAMAECDDGIAFYLDSSNWDLAQAYDQYQNTHQFNQSNPTSTPAPTSFPGGADVDMSPGADAEESAFDDIPDIPN  
 IGI PQMDQPSVPQESNAPGSGLGNITSQFSNFASSIQSNLQNLTTGGMFGVMGGGMMGMTDMNTQSNFSNRNLTAQEFLFQFRKKNM  
 HVILPKFVNNTFEEIGQESKRLRRPVFFYLHNDKGDSCNIVDQSVIGEEMTRMLLNKYICVGVNVNTEEGRKLTTALEIPKAPFIGITY  
 IDENGLQNI GSRSGDEINVMALSEMDEAASGVFNAIFDGDTTDLTFHIEDSNLQLETEEFKAEISAQMGNRTFDGYNEEPPRRRGPE  
 IDPTTGFPVGMTPQQIQDKILKDQQRQYAEIDEKNKVLIEER KK KQEENNLKR KEELEKKAKIEKLEEEKEMAEIVRSNLPEEPSE  
 GTPDTITIQFRFPDGNHKQVRRFYKTDKVQLLYDYITSFGNENGFEAAHTHFSIIQNFPPKFFEDMNKTLLEEEGLSNCTLMIKEHSHVE

>comp7882\_c0\_seq1 AAATAA

MNPKGSKREKRVKGSKNKSAKEAFLKKIDAAMKVYDYVDETKDVKGKSERLNAINELQNLQDQKSVSOLIIPNLDSQMIEKNI FRC  
 LPNIKSNLAFSETGIDQEEETDPAWPHVQGVYEFFLQ LIMNDSIEVKLLKGYVTPPEFVSRFLELFDSEEAVERYDLKNI LHKLYAKLV  
 PRRKMIRKAINETFYQLIHEGHKFN GASELLDILASII SGFAVPLREEHVIFFNII IRLHKVQTCSEFFEQLLRCSMLFLT KDKSLAI  
 SLLKGLLKYWPFANCVKETFLELTELQEVLEIVDDDKIGDLVPLFRIRIVKCI GGTHLQVADRAMCFFENDYFLT KLRIYKDVTFPMLVP  
 VIVELSENHWHKILQESLVALKVIL KEIDSAAFDEAQQISK KDHRRFIVKPNVEKRTELDAKWERLNTTLKST SAGFTPPDVPFKTSE  
 LISNYNGLYRKIYDKEKFIND

>comp7341\_c0\_seq1 AACTAA

MNMIDCNHSPSLSDSVGADGDKCEFSGERLEGSNNLPEEGITSISPDSL VNKASTLLRALTLFTSFSEFDTQNSPPPKTSKLFNDFS  
 LKLNMMKTCLSQA KTS DSEEKLPALKEEIESI KASIGEELALTP LGQALLWNLI EGDN KDSSMKI FDELDRHCQDIANLHEVIAQKDA  
 EIQTLSKQIRKLAKFRRTSSLVSEETEDGDSASQSDSGSMTQLSRSSLLNKLNLNTKSRLTLCLNKVRDLMLVKELKEPLQKINTLSF  
 NPGLLALEDAKEFLKNCFPLEVASFHFNKDSLLRNDLEKFLDVLRLTNEYVTD EIVLSNFVIDQDSL VKILSNFKNKEVVSNFNSCKMSL  
 SNPPEFGDSL D GATLKHLYLNF CGDKSHGDWASNPAHFENLINGLSHSPDLKASLKDIWMEGSGLKKDKARDILDTFGFHSTKIWI LYG

>comp5116\_c0\_seq1 AATTAA

MLPKPTNNMEKIKQQEYKYKIRKVFECIAK ESNHNN DITN KNEIAYILR YFSQFPSEAQVTDYVIQKIEDDEPNDFIKLTKFEPYLL  
 DVIENNEFEPSPPEHLLAAFRVLDTDKGRIPIDVLNLLTTEGIPFRKEEMDSFQEFALDKSQKFVYEDYVAKLVEENDKHVEEFLKE  
 YPTFKPPINQ

>comp7670\_c0\_seq1 AAATAG, AATTAA

MDEETIEKYCQALDLSVSPDNDLRKQAEAFIIEGME TPGFIAAMLHISSNPDLNRDRKIDITQAAA IQFKNIVETHWKYKDDEYAKEMR  
 EDGYKVI IIPDET KTYVKENILTAYINVHSEKVAKQDFDFIVRCITKHDFPKWPD LANKVKDYIESDDLYGSEM FVGLYTLKSICKRYE  
 YEFDAKREPLNEIADILFPRL EAITTCVEGDNSDQGSRLKNLIGHCFYISNQISLCKRYLDPSMLDFIVKFNTSALEAEIDNSLTQPT  
 SIEEIDHRAESFQWKLKMTAMNFLFRIFQKFSNPQYVNETMKPIAEHCINNYAEGIINLANTLIAKAK SIYIDRQVLSYCFKVVSTSI  
 NQTSYREMIKPLIPEILTSHCV PAMLLTEKDTEDFEADPVEFIRKARDPNPNIYTARN SVLEMIRNVTQHKSNDQK GALPDFLESFFGF  
 LLENLSECIKQDAPDFRIK DALLLCLGQIAPTLLMYDQFHDQLNQLVTGAVFQDLTSENELVKYRALWVYGQCSRVPMEDDHRLEVGK  
 LFQLMNDENTAVKITASTSLYKNLRNNSMKEAFKSELASILEAYLGLMDTIDNEELIAGLEEVVSLYEDCIGPYAIELCSK IVENFN K  
 ITGKEQEEEE YGTMGMATSGLVVTIRSIINSCKGDPETLLKLEPVIIPVVVRSLSADGCEYLDEAMDCITAILNFTQSATERMWALFPH  
 LLIK IIVGGPEDEEGGYAFDYFTSMEDYFR SLIKYGHGDM LTKKIGNDPVMILLIKGI IKILQLVKEGDVNTNAYICIVIVETLLEFP  
 KLDQLLPTFIKILCTELSNKEITKEFRLHALTLVAHCFIYNCTLT LGALTDLKVLPVVCQNF SYLKKFSEVEHLRGLIYGITALLRMD

EMPDVIKGSIQKIIIESLIDLMRKYTRERILELRSKFEDKRNRWDEGTDEYNNLDAPFQKLEWMEEYKDDAYSEDDDDDDNFEEDDYLW  
SRSDSCYYKSCLEDKEAPLFFKETLEDFRENKEEVYRGI IELIPEDSQKLEMMERCEYMQSLQS

>comp5528\_c0\_seq1 ATATAG

MSSQEILANSITNTVDKEKSAQEEQDDEVIIIDDQNPLLEDDLQIIDEPEQKVNTDEPDQRNQEDEASENEQNLSDFINNTEFSYQSSST  
TQNLKNLLIQSTIGLALKLKPGLKMLITNSDGGCCDDIRKSLDLNKQLLGEDVADLISVKQITWDESLQVSGTRYDYICITGSHFSQE  
FVQILEKIVPTVLSVVDDQERVFLGPTSEEDISQFEDNVGDTIFESKKEEIDVPTKNSNSLGQFGDPDNHYSSENKDLIDEGIFDDQD  
VLQREGHLGLPSLEDDNEDDYFEPIG

>comp8412\_c0\_seq1 ATATAA

MSKNTKSKQEI DSTSKKLSRKERKNLEYIQYAKERKEYQKWEKEEADNLGFEGEESAPPVQNTSTAAGEKKKKGGKKEKPTDKVTTSP  
EQKKAYSETVAKQDALIAELQVLDQREKRMKDLKKTQEQLSKLKDQTMKLTKERDDAKASLSKVEDKCNGLGQDYQELIE SVNREN  
DNEKLI NDLTNDKANLKDIVFLMFEKQKEGNSATEHPVVI PDNLQEEFNRSQTKSSQNNPQLKTLLEFANEQIKRLQKEIKEARNH  
LPKPELGEIDEATEEKED

>comp6034\_c0\_seq2 ATATAA

MSKNTKSKKQVTSNAKKGNGKGGKKAEPVQPPKEKKELAEWDLMPNFGFEPKKIAPTASKGPAVSGDKKKKGGKKEKTVEDTLISIE  
EAKRANPEE IARQETLITELKSQLEQKDQAIADLEKDQEQFKQLTEQAQQLTEERDETRAALAVAEGQCNQKLDQDFKQTVDRVNRN  
ENKLI SELTSEKSNLKDIVFLMFEKQKEGDSAPEGEEEEITDEITDEIHGEFDRNTRRQAPQDNSQVKTLLDFANEQIKRLQTELKE  
VRNQIPESALQELDQIDETLKETED

>comp2483\_c0\_seq1 ATATAA, AAATAA

MEKFGDLRASRHRVKHSMKSKNHRQYEQEEVKHARSRPDRFPDPPQIDEE SKYSAGIDEA IQLVEITEKGVCKINPIAMNIVKGIKTKV  
GIISVVGYPYRTGKSFLLNRLGQDGFIEGPTVQSCTRGIWIWGPVKVSEDMHVI LMDTEGLGSCNRTMNIDIKIFTLSVLLSSMFVY  
NCLNAIDENALEVLSLVNLAKEYISNQKKNDSMDVYNQANYSFYFMWVVRDFSLQMPPEEELKAGHDPATYWDKLENQEA AAKEYLEK  
SLEAIDLGTINEENKRTVTKKNEIRKAIKNFFHQREATCLFRPINEEELRIVNKIPYEDLRKPFPRKQVEHLINKIYYNVKPKSINGQT  
LTGKMFQMLEEYTSMMNNGMPEINTAWDRVMDTEIKRVLQESTTKINYLQEVVIDKMPMPLKQLISIERNVRKSALKLLYDPNKN  
APKDKLSRLQDKFIENLDEIFEGIFNENEIISKRQAKDLLPRMYQKIKAMINKGEFETIHDFSDIYGKMAISYFDNTNEPENYKI IQN  
FQINTVFEDLDEIMQTOVQRHESQNEQYETKLETKDHQIEHLNEQLKKEKTKNKDREQLRSKNMNI RSNLEEEIQMIKINQISNKDQ  
FESLGTMIKEGWNNSEQVLKEIKAKEIENIKATIALESQKKIKELETTHQEQQLHYKKEKKALEKTLAGLKMSYEDEIRLLKKNVKDQ  
DKKITLLKMKVCRKDTQIQMLEEKAQSNEKQDKLQKEHRDILFELARAFKEGTTPGKDSTTNESATPY

>comp6951\_c0\_seq1 GAGTAA

MYSTKFRVMTMAPLLL ANPALALCEEPSTADRIRGNYE NKIRFFAAPE KIFE TFSNIREEDGQVYMSYQDFHSLTPYNFVASKDDD  
DDDDDEENKDKKEKEPEGYFDKFTPEIMTIVDANQDKKIDFNEYIFFITLLQLPEGEVMRIIEKVNPEERKINKAQFAKYLTCLRKCTA  
LGLKQMSKSFMPDGRKISTDEDHISKTILLHLFNDKEYITIEDFCELKSKLKHALLHYEFYQFDVDEDETI SAESFAKSLLSCLNYTQA  
SKYSRRIHSLKLEGRVSFKYVAFHNLIKADI IKMKISTYRFLSLGMFRDLCDDFAKLDPYCNQNKVSI SDTQIATFFKVLDEDENGA  
LEYDEVVDILEGKKNIGLGEDKFKREMMEKIDRYIKKFQKYVGWT

>comp3853\_c0\_seq1 GTATAA

MSEENKEEVKGTTHTDDEDQYHHGFGNHFSEAEI EGALPKHRNPNQCKFGLYAEQISGTPFTYPRAKMQRSWLYRIMPTVAHPPYKALK  
DYNLWIANFARDDDEEVFTTPQQMR WTPIDLPSSEITFVQGIQTV TGAGDPSMKAGINMGVYTCNTSMK NEAFFSSDGDIMIVPQLG  
KLSIMTEFGHIEAESWEVVVPRGIKFAVEVNEDCRGYCYCELYDGHQLQIPDLGPIGTNGSANPRDFAIPKAKYFDETNEFRVIQKYLK  
FFEYTI PHNIFDIVAWHGNYPYKYDCHHFNMTGSI SYDHPDPSVFTVLTCTQTPDHGQAALDFAIFPPRWLSMEDTFRPPYFHRNTMNE  
FMGNVAGQYDAKEEGFSPGAVSLHSCMSAHGPEAEVVEK ASTCELKPQKVGE GCLAFMFETCYTMKVTKSFMHDLEGATDSYSVNSSKA  
VDES YHDCWKGMRKLFDPNDPDAGYKYLSEHKN

>comp5973\_c0\_seq1 TTATAG

MSHLKNFQFSSVQITEIDTYIEHLYSENMDLKLKGCISILYLCFSAENMEEMIEHESLLPAVSRILRDDYKKSLLDLSLYLLNVFYAYSH  
FTEFHPLLIENQIGDTCVKIIEYEIKRYKARVNEYTKTAQLVKQTQQTSPADTDLKELQNNFRKEEKRLSVTIKKQEKVLFVTFHILLN  
LAEDLKIERKMKRRIVPLLVSMLENNPDLLYIVLSFLKLSVFGSNKDDMLELDIMKKNRIFPCQNALLTQTALRLLFNLSFDNEI  
RERVNAIGMIPKLVLELLKVAQYRSILLRILYHLSSDDKIKATFAYTSCIPLVYQLVIHFPDAIIGKELIALAINLTTNKTNAALISQDD  
QLEALIERAFKYNDVLLFRVVRNIAQFGPVTNIDIYEKYMDKIELTKQCGDNTDLQIELIGTLVYINIEKWDTVLSQGDFLDFIHNND  
VSDYSEDDLVLLETIMLIGTMRSEKCAEAIAGSYIIGMLHELLGAKQEDDEMVOQIILYTYHRLLYRVYVREIMLEQTQIVNVILELLND  
KNPNIRKLVNSTLDLVQLHDEIWKQEI KTKKFEMHNE VYL GLMEEYE AQAEALDEEALYDYA QDPEALAALENGEFGEDDQWLDQND  
LAQRIWNGEMDPDQMMDPNQ

>comp4582\_c0\_seq1 TTATAA

LTVDSEFILLADKKNKNCITLSTFQDLISKIARKKHIFALNKNNEFAPNPMIGFIQNLCDKIYTTITDKEGKTAKEFLQDFEYCHNEEAEI  
 DIPKPKIMKKMPPGIKKRLLADYNKVEAAKKEVSKRAKNKVVIVSSKTLLEAFDLQDYHSFEYLFQYVEDKGIYAEELLHCLRNESN  
 RKIFVLILDYVLTTLPEEEFE **LIDVTNTTTQE**ISLRELFDPIDLKEFCLALYDSKNVPGEIPLKSKYLYTKLEVYTKKYSTLDEKNRTK  
 FLTTSLLVTGNTNPNEGYECLITKILDIISLYNIEIPIIYEGEVQEALRSNFKKLIFIRNYELVLKLQEIVKKNLRGLYEK **L** **SQEHLS**  
**YISR**LVQNSDAELGLEKDLLSDNEDVGVINSRQAVKDTLVFCLEQITLFDQYNQINFNDAPEKIIHMKVGFHILGGFVNIIVGF'DSLDN  
 KEVNEGVDVSEIKRLVTVTEQYKEAKHKFSQRLLLEFFSTFQKYNDSLSEYELIDVDSPLRWIIDCPGQESPNFFFEYCIEQGNIDLAMKLI  
 ESCDISEVISMFLQERTISNLLNSPHIFEFLLKMSKEEEKIKKLIDRTNILEIPIMKLENSLSIDFDDEEDGNSGPKKYTQDQLTLYY  
 FCYLKDSLVPKVGKEIPYFNLLFFNQGFQKYSLDELVKVLPDLKIKELNSLGYQIGKIIISQKPVNTKDLIEI

>comp7073\_c0\_seq1 AAATAA, AAATAA, TCCTAA

KVSKESSELSQNKNKPIKRRKITEDDKVEHLLSNSNSNSQOVNQVQVPREEIKQPPQDPHKDQNMADMARLESLDIPKVGRQPDKHKD  
 HPMETDHDQKPQADANQQARDPEKPVVPEDMRI PPSQPHVNPHTLAPLRDAPSSQPLRAPQASPIHEIETAKKGGKVAPEVIRPDND  
 VDMSKNMFENKSDRPMQQERAQVVTTPQFTEQVPQRKDKAVVHKSISEIKKENDAPNHRDRKGRANDLSAK **L**KLKFDKYSTSQGRKE  
 LGNMIRRISGPVQVQIVRLMRQFHVGNKEGKEFKFSLNTLTPAQCARVGMLEIGISDPGASSTGRAQTGKPGSHGERSSSAVGSQDAS  
 GAGRVSEREREIERRKRAEEEEARYKERRK **L**KEHEMKLQERKKDELRRKEQEQRKEENRKFKEQQEELLRRQEHERQQESDPHGSPYESKS  
 PVPPTTSEQQEAARVKAHQEQLEQKRLEEEKRRQAEAEERERIEQERRRAEEDKRRKAEELRKSEEQERQRELAKLRLEEERRKKKEAEE  
 QRRREERKRLELIKQKEEERRRQENS SPSK **KSS** **KACEEERRKRE**QEQLRKREEERRRQEQELEQKKKEEQRIREEQERRKREMEELR  
 IREEEQRRRQEQEEDRKRQELQRK **LKEDDEERRLKAEQERKQREEEQRRIRREEQERQRR**EEEQRRRLREEQERKRKQEEERKRKEEEERKR  
 KEEEEEERKRKEQEELRLREEQERKRREEEERRRIEEERRRMEEERKRKEEEERKR

## Supplementary Note 2. Executable Analysis Document Supporting Proteomics Component.

### 1 Introduction

The vignette describes and reproduces all the steps that aimed to confirm frameshifts in the *Euplotes crassus* proteome. The global 8M urea soluble proteome was digested using conventional trypsin protocol and alternatively with Glu-C protease under high pH (7.5) conditions. The latter restricts specificity of Glu-C cleavages to C-terminal of glutamic acid (E). The peptides resulting from trypsin digest were fractionated using two different approaches: with strong cation exchange (SCX) and high pH reverse phase (HPRP) chromatographies. The peptides from Glu-C digest were fractionated using HPRP only.

The datasets were deposited to PRIDE and available by this link <http://dx.doi.org/10.6019/PXD004333>. Summary of the datasets shown in the table below:

| Dataset Prefix    | Digestion Enzyme | Fractionation Chromatography Type |
|-------------------|------------------|-----------------------------------|
| Euplotes_1_SCX    | trypsin          | SCX                               |
| Euplotes_1_HPRP_1 | trypsin          | HPRP                              |
| Euplotes_1_HPRP_2 | Glu-C (pH 7.5)   | HPRP                              |

Preprocessing of the raw files prior MS/MS searches was done in two steps. First, the raw files were processed with [DeconMSn](#) to correct for wrong assignments of monoisotopic peaks. The parameters are as follows:

```
DeconMSN.exe -I35 -G1 -F1 -L6810 -B200 -T5000 -M3 -XCDA
```

At the second step the peak files were processed with [DtaRefinery](#) to perform post-acquisition recalibration of parent ion mass-to-charge ratios. The peak lists (concatenated dta files in this case) were searched using [MS-GF+](#) tool against 6-frame translated *Euplotes Crassus* genome concatenated with tentatively frameshifted sequences and common contaminants. The 6-frame translated FASTA file, DtaRefinery and MS-GF+ parameter files are available in `extdata` folder of the `EuplotesCrassus.proteome` package.

For example:

```
fpath <- system.file("extdata",
  "MSGFDB_GluC_StatCysAlk_10ppmParTol.txt",
  package="EuplotesCrassus.proteome")
```



```

cat(readLines(fpath, n=12), sep = '\n')
## #Parent mass tolerance
## # Examples: 2.5Da or 30ppm
## # Use comma to set asymmetric values, for example "0.5Da,2.5Da" will set 0.5Da to the left (expMass<
## PMTolerance=10ppm
##
## #Max Number of Modifications per peptide
## # If this value is large, the search will be slow
## NumMods=3
##
## #Modifications (see below for examples)
## StaticMod=C2H3N1O1, C, fix, any, Carbamidomethyl # Fixed Carbamidomethyl C (alkylation

```

## 2 Post MS/MS Search Analysis Steps

---

### 2.1 Prerequisites

#### 2.1.1 Downloading Datasets

To download the datasets we will take advantage of `rpx` R package. Note, this step may take awhile (10-30 min) depending on the speed of the internet connection. However, if they are downloaded the script will use the available datasets instead of downloading them again.

```

library(rpx)
id <- "PXD004333"
px <- PXDataset(id)
repoFiles <- pxfiles(px)
mzids <- grep('*msgfplus.mzid.gz', repoFiles, value=T)
system.time(pxget(px, mzids))
## user system elapsed
## 0.295 0.012 3.000

```

#### 2.1.2 Reading Frameshift Marks

The FASTA files containing 595 sequences with frameshifts available as a part of this package and available as `system.file("extdata", "Euplotes_Crassus_frameshifts.fasta", package="EuplotesCrassus.proteome")`. There is an additional FASTA file with frameshift locations marked with exclamation mark !.

```

library(Biostrings)
fasta_clean <- readAAStringSet(
  system.file("extdata",
    "Euplotes_Crassus_frameshifts.fasta",
    package="EuplotesCrassus.proteome"),
  format="fasta", nrec=-1L, skip=0L, use.names=TRUE)
fasta_marks <- readAAStringSet(
  system.file("extdata",
    "Euplotes_Crassus_frameshifts_with_mark.fasta",
    package="EuplotesCrassus.proteome"),
  format="fasta", nrec=-1L, skip=0L, use.names=TRUE)
length(fasta_clean)

```

####

```
## [1] 595
```

## 2.2 Processing of MS/MS Search Results

### 2.2.1 Trypsin Digest Fractionated by SCX

For processing of MS/MS identification we will use [MSnID](#) R package. First step is to read the LC-MS/MS datasets corresponding to 25 SCX fractions.

```
library(MSnID)
trypscX <- grep('Euplotes_1_SCX_.*msgfplus.mzid.gz', repoFiles, value=T)
trypscXPrj <- MSnID()
system.time(trypscXPrj <- read_mzIDs(trypscXPrj, trypscX, backend = 'mzR'))
##      user  system elapsed
##  4.829   0.214   5.106
```

Assess the peptide termini for their corresponding cleavage patterns. We will leave peptides that resulted only from proper trypsin cleavage events. That is we won't allow peptide resulting from irregular cleavages.

```
trypscXPrj <- assess_termini(trypscXPrj, validCleavagePattern="[KR]\\.[^P]")
trypscXPrj <- apply_filter(trypscXPrj, "numIrregCleavages == 0")
```

Note, that for this project we are interested only in peptides covering the sites of the frameshifting events. So if a peptide identification can be explained by a regular protein sequence we are not interested in pursuing this identification. The protein/accession names of normal (non-frameshifted) sequences starts with Contig or Contaminant. If the FASTA entry sequence is a results of the frameshift event if starts with comp. Therefore in the code below we retain only peptide-to-spectrum matches that can appear only due to frameshifted sequences.

```
## Rule on how to split the names.
## Contig + Contaminants - main piece
## comp - sequences with frameshifts
trypscXPrj.main <- apply_filter(trypscXPrj, "!grepl('comp', accession)")
trypscXPrj.fmsH <- apply_filter(trypscXPrj, "grepl('comp', accession)")
## if peptide matches to the main piece we don't care about it
trypscXPrj.fmsH <- apply_filter(trypscXPrj.fmsH,
                               "!(peptide %in% peptides(trypscXPrj.main))")

show(trypscXPrj.fmsH)
## MSnID object
## Working directory: "."
## #Spectrum Files: 25
## #PSMs: 442 at 58 % FDR
## #peptides: 348 at 67 % FDR
## #accessions: 291 at 66 % FDR
```

Setting-up and optimizing filtering options for MS/MS identifications. Since the number of peptides mapping frameshifted sequences is rather low we will loosen up the FDR of the identification up to 5%, however, then follow-up with manual spectra validation.

```
trypscXPrj.fmsH$mme.ppm <- abs(mass_measurement_error(trypscXPrj.fmsH))
trypscXPrj.fmsH$score <- -log10(trypscXPrj.fmsH$`MS.GF.SpecEValue`)
trypscXPrj.fmsH <- apply_filter(trypscXPrj.fmsH, "mme.ppm < 10")

filtr <- MSnIDFilter(trypscXPrj.fmsH)
filtr$mme.ppm <- list(comparison="<", threshold=5.0)
filtr$score <- list(comparison=">", threshold=8.0)
```

```
###
```

```

#' pre-optimization with brute-force approach
filtr.grid <- optimize_filter(filtr, trypscxCPrj.fmsH, fdr.max=0.05,
                             method="Grid", level="peptide", n.iter=20000)
evaluate_filter(trypscxCPrj.fmsH, filtr.grid)
##           fdr    n
## PSM      0.02970297 104
## peptide  0.03703704  56
## accession 0.04166667  50

```

```

#' fine tune with optimization using simulated annealing technique
filtr.sann <- optimize_filter(filtr.grid, trypscxCPrj.fmsH, fdr.max=0.05,
                              method="SANN", level="peptide", n.iter=20000)
evaluate_filter(trypscxCPrj.fmsH, filtr.sann)
##           fdr    n
## PSM      0.02941176 105
## peptide  0.03636364  57
## accession 0.04081633  51

```

```

trypscxCPrj.fmsH <- apply_filter(trypscxCPrj.fmsH, filtr.sann)
show(trypscxCPrj.fmsH)
## MSnID object
## Working directory: "."
## #Spectrum Files: 18
## #PSMs: 105 at 2.9 % FDR
## #peptides: 57 at 3.6 % FDR
## #accessions: 51 at 4.1 % FDR

```

Finally we will extract only those peptides that exactly span the frameshift sites. That is their sequences should be present/identifiable in normal FASTA file, however missing in the file with frameshifts masked with the exclamation mark !.

```

#' extract only those that map frameshift sites
library(dplyr)
pepSeq <- unique(trypscxCPrj.fmsH$pepSeq)
pepSeqMapped_to_clean <- pepSeq %>%
  sapply(grep, x=fasta_clean) %>%
  sapply(length) %>%
  subset(>0) %>%
  names
pepSeqMapped_to_with_marks <- pepSeq %>%
  sapply(grep, x=fasta_marks) %>%
  sapply(length) %>%
  subset(>0) %>%
  names
pepSeqFmsH_trypscxC <- setdiff(pepSeqMapped_to_clean, pepSeqMapped_to_with_marks)
print(pepSeqFmsH_trypscxC)
## [1] "SAQEEQDDEVIIDDQNPLLEDDLQIDEPEQK" "WTPIDLPSSEITFVQGIQTVTGAGDPSMK"
## [3] "ESNHNNDITNKNEIAYILR" "KKKQEENNLKR"

```

Reporting extra information on the peptide sequences spanning frameshift sites: dataset, scan, charge, score, and mass measurement error.

```

meta_trypscxC <- trypscxCPrj.fmsH %>%
  apply_filter('pepSeq %in% pepSeqFmsH_trypscxC') %>%
  psms %>%

```

####

```

select(spectrumFile,MS.GF.SpecEValue,mme.ppm,spectrumID,chargeState,peptide) %>%
rename(SpecEValue = MS.GF.SpecEValue, charge = chargeState, `MME (ppm)`=mme.ppm) %>%
mutate(spectrumFile = sub('_msgfplus.mzid.gz',' ',spectrumFile))
library(xtable)
print(xtable(meta_tryp_scx, display = c('d','s','e','f','s','d','s')),
      include.rownames=FALSE,
      comment = FALSE,
      size='scriptsize',
      floating = F)

```

| spectrumFile                              | SpecEValue | MME (ppm) | spectrumID  | charge | peptide                             |
|-------------------------------------------|------------|-----------|-------------|--------|-------------------------------------|
| Euplotes_1_SCX_10_13Nov09_Falcon_09-09-14 | 3.41e-15   | 0.30      | index=6106  | 3      | K.SAQEEQDDEVIIDDQNPLLEDDLQIDEPEQK.V |
| Euplotes_1_SCX_10_13Nov09_Falcon_09-09-14 | 3.41e-15   | 0.30      | index=6106  | 3      | K.SAQEEQDDEVIIDDQNPLLEDDLQIDEPEQK.V |
| Euplotes_1_SCX_12_13Nov09_Falcon_09-09-14 | 1.53e-21   | 0.08      | index=8908  | 2      | R.WTPIDLPSSEITFVQGIQTVTGAGDPSMK.A   |
| Euplotes_1_SCX_12_13Nov09_Falcon_09-09-14 | 1.07e-20   | 1.10      | index=8896  | 2      | R.WTPIDLPSSEITFVQGIQTVTGAGDPSMK.A   |
| Euplotes_1_SCX_12_13Nov09_Falcon_09-09-14 | 7.29e-19   | 1.10      | index=8897  | 2      | R.WTPIDLPSSEITFVQGIQTVTGAGDPSMK.A   |
| Euplotes_1_SCX_12_13Nov09_Falcon_09-09-14 | 2.17e-15   | 0.94      | index=8895  | 3      | R.WTPIDLPSSEITFVQGIQTVTGAGDPSMK.A   |
| Euplotes_1_SCX_18_13Nov09_Falcon_09-09-15 | 9.27e-17   | 0.11      | index=5912  | 2      | K.ESNHNDITNKNEIAYILR.Y              |
| Euplotes_1_SCX_20_13Nov09_Falcon_09-09-15 | 2.23e-11   | 0.70      | index=10317 | 3      | R.WTPIDLPSSEITFVQGIQTVTGAGDPSMK.A   |
| Euplotes_1_SCX_22_13Nov09_Falcon_09-09-15 | 4.36e-10   | 3.76      | index=9720  | 3      | R.WTPIDLPSSEITFVQGIQTVTGAGDPSMK.A   |
| Euplotes_1_SCX_23_13Nov09_Falcon_09-09-15 | 2.47e-09   | 1.64      | index=9440  | 3      | R.WTPIDLPSSEITFVQGIQTVTGAGDPSMK.A   |
| Euplotes_1_SCX_24_13Nov09_Falcon_09-09-15 | 3.42e-10   | 8.85      | index=2127  | 3      | R.KKKQEENLKR.K                      |

####

## 2.2.2 Trypsin Digest Fractionated by HPRP

All the processing steps are conceptually the same as in the section above.

```
tryphprp <- grep('Euplotes_1_HPRP_1_.*msgfplus.mzid.gz', repoFiles, value=T)
tryphprpPrj <- MSnID()
system.time(tryphprpPrj <- read_mzIDs(tryphprpPrj, tryphprp, backend = 'mzR'))
##      user  system elapsed
##  2.716   0.175   2.945
```

```
tryphprpPrj <- assess termini(tryphprpPrj, validCleavagePattern="[KR]\\.[~P]")
tryphprpPrj <- apply_filter(tryphprpPrj, "numIrregCleavages == 0")
```

```
tryphprpPrj.main <- apply_filter(tryphprpPrj, "!grepl('comp', accession)")
tryphprpPrj.fmsH <- apply_filter(tryphprpPrj, "grepl('comp', accession)")
tryphprpPrj.fmsH <- apply_filter(tryphprpPrj.fmsH,
                                "!(peptide %in% peptides(tryphprpPrj.main))")
show(tryphprpPrj.fmsH)
## MSnID object
## Working directory: "."
## #Spectrum Files: 24
## #PSMs: 511 at 49 % FDR
## #peptides: 399 at 62 % FDR
## #accessions: 293 at 78 % FDR
```

```
tryphprpPrj.fmsH$mme.ppm <- abs(mass_measurement_error(tryphprpPrj.fmsH))
tryphprpPrj.fmsH$score <- -log10(tryphprpPrj.fmsH$`MS.GF.SpecEValue`)
tryphprpPrj.fmsH <- apply_filter(tryphprpPrj.fmsH, "mme.ppm < 10")
```

```
filtr <- MSnIDFilter(tryphprpPrj.fmsH)
filtr$mme.ppm <- list(comparison="<", threshold=5.0)
filtr$score <- list(comparison=">", threshold=8.0)
filtr.grid <- optimize_filter(filtr, tryphprpPrj.fmsH, fdr.max=0.05,
                             method="Grid", level="peptide", n.iter=20000)
evaluate_filter(tryphprpPrj.fmsH, filtr.grid)
##           fdr  n
## PSM      0.02631579 195
## peptide  0.04504505 116
## accession 0.07142857 75
```

```
filtr.sann <- optimize_filter(filtr.grid, tryphprpPrj.fmsH, fdr.max=0.05,
                             method="SANN", level="peptide", n.iter=20000)
evaluate_filter(tryphprpPrj.fmsH, filtr.sann)
##           fdr  n
## PSM      0.02604167 197
## peptide  0.04504505 116
## accession 0.07142857 75
```

```
tryphprpPrj.fmsH <- apply_filter(tryphprpPrj.fmsH, filtr.sann)
show(tryphprpPrj.fmsH)
## MSnID object
## Working directory: "."
## #Spectrum Files: 23
## #PSMs: 197 at 2.6 % FDR
## #peptides: 116 at 4.5 % FDR
```

###

```
## #accessions: 75 at 7.1 % FDR
```

```
library(dplyr)
pepSeq <- unique(tryphprpPrj.fmsH$pepSeq)
pepSeqMapped_to_clean <- pepSeq %>%
  sapply(grep, x=fasta_clean) %>%
  sapply(length) %>%
  subset(>0) %>%
  names
pepSeqMapped_to_with_marks <- pepSeq %>%
  sapply(grep, x=fasta_marks) %>%
  sapply(length) %>%
  subset(>0) %>%
  names
pepSeqFmsH_tryphprp <- setdiff(pepSeqMapped_to_clean, pepSeqMapped_to_with_marks)
print(pepSeqFmsH_tryphprp)
## [1] "FFAAPEK" "ELAFLKRAQEIGLEPYNEYHGKKK"
## [3] "VVQEGNTNVKK" "WTPIDLPSSEITFVQGIQTVTGAGDPSMK"
## [5] "IIQNFQINTVFEDLDEIMQTQVQR" "KSSKACEEERRKR"
## [7] "LINDLTNDK" "LISELTSEK"
## [9] "IVENFNK" "LSQEHLISYISR"
## [11] "LINDLTNDKANLK"
```

```
meta_tryphprp <- tryphprpPrj.fmsH %>%
  apply_filter('pepSeq %in% pepSeqFmsH_tryphprp') %>%
  psms %>%
  select(spectrumFile, MS.GF.SpecEValue, mme.ppm, spectrumID, chargeState, peptide) %>%
  rename(SpecEValue = MS.GF.SpecEValue, charge = chargeState, `MME (ppm)` = mme.ppm) %>%
  mutate(spectrumFile = sub('_msgfplus.mzid.gz', '', spectrumFile))
library(xtable)
print(xtable(meta_tryphprp, display = c('d', 's', 'e', 'f', 's', 'd', 's')),
  include.rownames=FALSE,
  comment = FALSE,
  size='scriptsize',
  floating = F)
```

| spectrumFile                                 | SpecEValue | MME (ppm) | spectrumID  | charge | peptide                           |
|----------------------------------------------|------------|-----------|-------------|--------|-----------------------------------|
| Euplotes_1_HPRP_1_04_17Nov09_Falcon_09-09-14 | 7.58e-11   | 0.08      | index=3031  | 1      | R.FFAAPEK.I                       |
| Euplotes_1_HPRP_1_04_17Nov09_Falcon_09-09-14 | 2.44e-09   | 0.00      | index=3046  | 2      | R.FFAAPEK.I                       |
| Euplotes_1_HPRP_1_05_17Nov09_Falcon_09-09-14 | 1.46e-09   | 5.31      | index=8245  | 3      | R.ELAFLKRAQEIGLEPYNEYHGKKK.T      |
| Euplotes_1_HPRP_1_06_17Nov09_Falcon_09-09-14 | 5.54e-10   | 2.21      | index=759   | 2      | K.VVQEGNTNVKK.L                   |
| Euplotes_1_HPRP_1_08_17Nov09_Falcon_09-09-14 | 5.93e-22   | 2.11      | index=8644  | 2      | R.WTPIDLPSSEITFVQGIQTVTGAGDPSMK.A |
| Euplotes_1_HPRP_1_08_17Nov09_Falcon_09-09-14 | 2.18e-21   | 0.78      | index=8638  | 2      | R.WTPIDLPSSEITFVQGIQTVTGAGDPSMK.A |
| Euplotes_1_HPRP_1_08_17Nov09_Falcon_09-09-14 | 3.05e-21   | 2.11      | index=8646  | 2      | R.WTPIDLPSSEITFVQGIQTVTGAGDPSMK.A |
| Euplotes_1_HPRP_1_08_17Nov09_Falcon_09-09-14 | 4.19e-16   | 0.82      | index=8639  | 3      | R.WTPIDLPSSEITFVQGIQTVTGAGDPSMK.A |
| Euplotes_1_HPRP_1_09_17Nov09_Falcon_09-09-14 | 1.19e-21   | 0.70      | index=8806  | 2      | R.WTPIDLPSSEITFVQGIQTVTGAGDPSMK.A |
| Euplotes_1_HPRP_1_09_17Nov09_Falcon_09-09-14 | 1.20e-21   | 1.57      | index=8812  | 2      | R.WTPIDLPSSEITFVQGIQTVTGAGDPSMK.A |
| Euplotes_1_HPRP_1_09_17Nov09_Falcon_09-09-14 | 5.49e-20   | 1.64      | index=8802  | 2      | R.WTPIDLPSSEITFVQGIQTVTGAGDPSMK.A |
| Euplotes_1_HPRP_1_09_17Nov09_Falcon_09-09-14 | 4.33e-15   | 1.53      | index=8810  | 3      | R.WTPIDLPSSEITFVQGIQTVTGAGDPSMK.A |
| Euplotes_1_HPRP_1_16_22Nov09_Falcon_09-09-14 | 4.51e-21   | 0.33      | index=10684 | 2      | K.IIQNFQINTVFEDLDEIMQTQVQR.H      |
| Euplotes_1_HPRP_1_16_22Nov09_Falcon_09-09-14 | 1.36e-11   | 1.25      | index=10678 | 3      | K.IIQNFQINTVFEDLDEIMQTQVQR.H      |
| Euplotes_1_HPRP_1_18_17Nov09_Falcon_09-09-15 | 5.08e-09   | 2.64      | index=13785 | 2      | K.KSSKACEEERRKR.E                 |
| Euplotes_1_HPRP_1_20_17Nov09_Falcon_09-09-15 | 1.91e-11   | 0.00      | index=3425  | 1      | K.LINDLTNDK.A                     |
| Euplotes_1_HPRP_1_22_17Nov09_Falcon_09-09-15 | 6.65e-11   | 1.67      | index=3600  | 2      | K.LISELTSEK.S                     |
| Euplotes_1_HPRP_1_22_17Nov09_Falcon_09-09-15 | 2.55e-10   | 0.78      | index=3602  | 1      | K.LISELTSEK.S                     |
| Euplotes_1_HPRP_1_22_17Nov09_Falcon_09-09-15 | 1.89e-09   | 0.49      | index=2595  | 2      | K.IVENFNK.I                       |
| Euplotes_1_HPRP_1_23_17Nov09_Falcon_09-09-15 | 3.01e-13   | 1.01      | index=2200  | 2      | K.LSQEHLISYISR.L                  |
| Euplotes_1_HPRP_1_24_17Nov09_Falcon_09-09-15 | 2.45e-16   | 1.41      | index=2709  | 2      | K.LINDLTNDKANLK.D                 |

```
####
```

### 2.2.3 Glu-C Digest Fractionated by HPRP

All the processing steps are conceptually the same as in the section above. The only substantial difference is the specification of the enzyme digestion rule.

```
gluchprp <- grep('Euplotes_1_HPRP_2_.*msgfplus.mzid.gz', repoFiles, value=T)
gluchprpPrj <- MSnID()
system.time(gluchprpPrj <- read_mzIDs(gluchprpPrj, gluchprp, backend = 'mzR'))
##      user  system elapsed
##  2.780   0.190   3.027
```

```
gluchprpPrj <- assess termini(gluchprpPrj, validCleavagePattern="E\\.[^P]")
gluchprpPrj <- apply_filter(gluchprpPrj, "numIrregCleavages == 0")
```

```
gluchprpPrj.main <- apply_filter(gluchprpPrj, "!grepl('comp', accession)")
gluchprpPrj.fmsH <- apply_filter(gluchprpPrj, "grepl('comp', accession)")
gluchprpPrj.fmsH <- apply_filter(gluchprpPrj.fmsH,
                                "!(peptide %in% peptides(gluchprpPrj.main))")
show(gluchprpPrj.fmsH)
## MSnID object
## Working directory: "."
## #Spectrum Files: 24
## #PSMs: 555 at 67 % FDR
## #peptides: 440 at 80 % FDR
## #accessions: 297 at 89 % FDR
```

```
gluchprpPrj.fmsH$mme.ppm <- abs(mass_measurement_error(gluchprpPrj.fmsH))
gluchprpPrj.fmsH$score <- -log10(gluchprpPrj.fmsH$`MS.GF.SpecEValue`)
gluchprpPrj.fmsH <- apply_filter(gluchprpPrj.fmsH, "mme.ppm < 10")
```

```
filtr <- MSnIDFilter(gluchprpPrj.fmsH)
filtr$mme.ppm <- list(comparison="<", threshold=5.0)
filtr$score <- list(comparison=">", threshold=8.0)
filtr.grid <- optimize_filter(filtr, gluchprpPrj.fmsH, fdr.max=0.05,
                             method="Grid", level="peptide", n.iter=20000)
evaluate_filter(gluchprpPrj.fmsH, filtr.grid)
##           fdr  n
## PSM      0.02222222 46
## peptide  0.03448276 30
## accession 0.05000000 21
```

```
filtr.sann <- optimize_filter(filtr.grid, gluchprpPrj.fmsH, fdr.max=0.05,
                             method="SANN", level="peptide", n.iter=20000)
evaluate_filter(gluchprpPrj.fmsH, filtr.sann)
##           fdr  n
## PSM      0.02222222 46
## peptide  0.03448276 30
## accession 0.05000000 21
```

```
gluchprpPrj.fmsH <- apply_filter(gluchprpPrj.fmsH, filtr.sann)
show(gluchprpPrj.fmsH)
## MSnID object
## Working directory: "."
## #Spectrum Files: 18
## #PSMs: 46 at 2.2 % FDR
```

```
## #peptides: 30 at 3.4 % FDR
## #accessions: 21 at 5 % FDR
```

```
library(dplyr)
pepSeq <- unique(gluchprpPrj.fmsH$pepSeq)
pepSeqMapped_to_clean <- pepSeq %>%
  sapply(grep, x=fasta_clean) %>%
  sapply(length) %>%
  subset(>0) %>%
  names
pepSeqMapped_to_with_marks <- pepSeq %>%
  sapply(grep, x=fasta_marks) %>%
  sapply(length) %>%
  subset(>0) %>%
  names
pepSeqFmsH_gluchprp <- setdiff(pepSeqMapped_to_clean, pepSeqMapped_to_with_marks)
print(pepSeqFmsH_gluchprp)
## [1] "NFNKITGKEQEEEE"          "SVNRENLDNEKLINDLTNDKANLKDIVFDLMFE"
## [3] "NLDNEKLINDLTNDKANLKDIVFDLMFE"  "NKIRFFAAPEKIFE"
## [5] "MQDEEILKSIEESKLEQEKEEKKNE"    "VYLGLMEEYE"
```

```
meta_gluc_hprp <- gluchprpPrj.fmsH %>%
  apply_filter('pepSeq %in% pepSeqFmsH_gluchprp') %>%
  psms %>%
  select(spectrumFile, MS.GF.SpecEValue, mme.ppm, spectrumID, chargeState, peptide) %>%
  rename(SpecEValue = MS.GF.SpecEValue, charge = chargeState, `MME (ppm)`=mme.ppm) %>%
  mutate(spectrumFile = sub('_msgfplus.mzid.gz', '', spectrumFile))
library(xtable)
print(xtable(meta_gluc_hprp, display = c('d', 's', 'e', 'f', 's', 'd', 's')),
      include.rownames=FALSE,
      comment = FALSE,
      size='scriptsize',
      floating = F)
```

| spectrumFile                                 | SpecEValue | MME (ppm) | spectrumID  | charge | peptide                               |
|----------------------------------------------|------------|-----------|-------------|--------|---------------------------------------|
| Euplotes_1_HPRP_2_06_22Nov09_Falcon_09-09-15 | 6.80e-07   | 2.95      | index=13369 | 2      | E.NFNKITGKEQEEEE.Y                    |
| Euplotes_1_HPRP_2_08_25Nov09_Falcon_09-09-15 | 3.78e-17   | 0.19      | index=9982  | 3      | E.SVNRENLDNEKLINDLTNDKANLKDIVFDLMFE.K |
| Euplotes_1_HPRP_2_08_25Nov09_Falcon_09-09-15 | 3.33e-07   | 0.57      | index=9974  | 4      | E.SVNRENLDNEKLINDLTNDKANLKDIVFDLMFE.K |
| Euplotes_1_HPRP_2_09_17Nov09_Falcon_09-09-17 | 5.74e-16   | 0.44      | index=10771 | 3      | E.NLDNEKLINDLTNDKANLKDIVFDLMFE.K      |
| Euplotes_1_HPRP_2_09_17Nov09_Falcon_09-09-17 | 5.03e-07   | 1.11      | index=10770 | 4      | E.NLDNEKLINDLTNDKANLKDIVFDLMFE.K      |
| Euplotes_1_HPRP_2_12_17Nov09_Falcon_09-09-17 | 2.09e-09   | 0.43      | index=3933  | 3      | E.NKIRFFAAPEKIFE.T                    |
| Euplotes_1_HPRP_2_12_17Nov09_Falcon_09-09-17 | 1.62e-07   | 0.07      | index=3930  | 2      | E.NKIRFFAAPEKIFE.T                    |
| Euplotes_1_HPRP_2_15_17Nov09_Falcon_09-09-17 | 2.83e-07   | 1.61      | index=1758  | 2      | E.MQDEEILKSIEESKLEQEKEEKKNE.E         |
| Euplotes_1_HPRP_2_21_22Nov09_Falcon_09-09-17 | 2.17e-07   | 0.10      | index=6671  | 1      | E.VYLGLMEEYE.A                        |
| Euplotes_1_HPRP_2_22_22Nov09_Falcon_09-09-17 | 2.12e-08   | 0.88      | index=6753  | 1      | E.VYLGLMEEYE.A                        |

```
###
```



## 2.3 Compendium of Peptides Covering Frameshift Locations

Final set of peptides and corresponding references to LC-MS/MS datasets and spectra. Overall, **4**, **11**, and **6** unique peptide sequences spanning the frameshift sites were identified in trypsin/SCX, trypsin/HPRP, and 'Glu-C/HPRP' experiments, respectively.

| spectrumFile                                 | SpecEValue | MME (ppm) | spectrumID  | charge | peptide                               | experiment   |
|----------------------------------------------|------------|-----------|-------------|--------|---------------------------------------|--------------|
| Euplotes_1_SCX_10_13Nov09_Falcon_09-09-14    | 3.41e-15   | 0.30      | index=6106  | 3      | K.SAQEEQDDEVIIDDQNPILLEDDLQIDEPEQK.V  | trypsin/SCX  |
| Euplotes_1_SCX_10_13Nov09_Falcon_09-09-14    | 3.41e-15   | 0.30      | index=6106  | 3      | K.SAQEEQDDEVIIDDQNPILLEDDLQIDEPEQK.V  | trypsin/SCX  |
| Euplotes_1_SCX_12_13Nov09_Falcon_09-09-14    | 1.53e-21   | 0.08      | index=8908  | 2      | R.WTPIDLPSSEITFVQGIQTVTGAGDPSMK.A     | trypsin/SCX  |
| Euplotes_1_SCX_12_13Nov09_Falcon_09-09-14    | 1.07e-20   | 1.10      | index=8896  | 2      | R.WTPIDLPSSEITFVQGIQTVTGAGDPSMK.A     | trypsin/SCX  |
| Euplotes_1_SCX_12_13Nov09_Falcon_09-09-14    | 7.29e-19   | 1.10      | index=8897  | 2      | R.WTPIDLPSSEITFVQGIQTVTGAGDPSMK.A     | trypsin/SCX  |
| Euplotes_1_SCX_12_13Nov09_Falcon_09-09-14    | 2.17e-15   | 0.94      | index=8895  | 3      | R.WTPIDLPSSEITFVQGIQTVTGAGDPSMK.A     | trypsin/SCX  |
| Euplotes_1_SCX_18_13Nov09_Falcon_09-09-15    | 9.27e-17   | 0.11      | index=5912  | 2      | K.ESNHNDITNKNEIAYILR.Y                | trypsin/SCX  |
| Euplotes_1_SCX_20_13Nov09_Falcon_09-09-15    | 2.23e-11   | 0.70      | index=10317 | 3      | R.WTPIDLPSSEITFVQGIQTVTGAGDPSMK.A     | trypsin/SCX  |
| Euplotes_1_SCX_22_13Nov09_Falcon_09-09-15    | 4.36e-10   | 3.76      | index=9720  | 3      | R.WTPIDLPSSEITFVQGIQTVTGAGDPSMK.A     | trypsin/SCX  |
| Euplotes_1_SCX_23_13Nov09_Falcon_09-09-15    | 2.47e-09   | 1.64      | index=9440  | 3      | R.WTPIDLPSSEITFVQGIQTVTGAGDPSMK.A     | trypsin/SCX  |
| Euplotes_1_SCX_24_13Nov09_Falcon_09-09-15    | 3.42e-10   | 8.85      | index=2127  | 3      | R.KKKQEENLKR.K                        | trypsin/SCX  |
| Euplotes_1_HPRP_1_04_17Nov09_Falcon_09-09-14 | 7.58e-11   | 0.08      | index=3031  | 1      | R.FFAAPEK.I                           | trypsin/HPRP |
| Euplotes_1_HPRP_1_04_17Nov09_Falcon_09-09-14 | 2.44e-09   | 0.00      | index=3046  | 2      | R.FFAAPEK.I                           | trypsin/HPRP |
| Euplotes_1_HPRP_1_05_17Nov09_Falcon_09-09-14 | 1.46e-09   | 5.31      | index=8245  | 3      | R.ELAFKRAQEGILEPYNEYHGKKK.T           | trypsin/HPRP |
| Euplotes_1_HPRP_1_06_17Nov09_Falcon_09-09-14 | 5.54e-10   | 2.21      | index=759   | 2      | K.VVQEGNTNVKK.L                       | trypsin/HPRP |
| Euplotes_1_HPRP_1_08_17Nov09_Falcon_09-09-14 | 5.93e-22   | 2.11      | index=8644  | 2      | R.WTPIDLPSSEITFVQGIQTVTGAGDPSMK.A     | trypsin/HPRP |
| Euplotes_1_HPRP_1_08_17Nov09_Falcon_09-09-14 | 2.18e-21   | 0.78      | index=8638  | 2      | R.WTPIDLPSSEITFVQGIQTVTGAGDPSMK.A     | trypsin/HPRP |
| Euplotes_1_HPRP_1_08_17Nov09_Falcon_09-09-14 | 3.05e-21   | 2.11      | index=8646  | 2      | R.WTPIDLPSSEITFVQGIQTVTGAGDPSMK.A     | trypsin/HPRP |
| Euplotes_1_HPRP_1_08_17Nov09_Falcon_09-09-14 | 4.19e-16   | 0.82      | index=8639  | 3      | R.WTPIDLPSSEITFVQGIQTVTGAGDPSMK.A     | trypsin/HPRP |
| Euplotes_1_HPRP_1_09_17Nov09_Falcon_09-09-14 | 1.19e-21   | 0.70      | index=8806  | 2      | R.WTPIDLPSSEITFVQGIQTVTGAGDPSMK.A     | trypsin/HPRP |
| Euplotes_1_HPRP_1_09_17Nov09_Falcon_09-09-14 | 1.20e-21   | 1.57      | index=8812  | 2      | R.WTPIDLPSSEITFVQGIQTVTGAGDPSMK.A     | trypsin/HPRP |
| Euplotes_1_HPRP_1_09_17Nov09_Falcon_09-09-14 | 5.49e-20   | 1.64      | index=8802  | 2      | R.WTPIDLPSSEITFVQGIQTVTGAGDPSMK.A     | trypsin/HPRP |
| Euplotes_1_HPRP_1_09_17Nov09_Falcon_09-09-14 | 4.33e-15   | 1.53      | index=8810  | 3      | R.WTPIDLPSSEITFVQGIQTVTGAGDPSMK.A     | trypsin/HPRP |
| Euplotes_1_HPRP_1_16_22Nov09_Falcon_09-09-14 | 4.51e-21   | 0.33      | index=10684 | 2      | K.IIQNFQINTVFEDLDEIMQTVQQR.H          | trypsin/HPRP |
| Euplotes_1_HPRP_1_16_22Nov09_Falcon_09-09-14 | 1.36e-11   | 1.25      | index=10678 | 3      | K.IIQNFQINTVFEDLDEIMQTVQQR.H          | trypsin/HPRP |
| Euplotes_1_HPRP_1_18_17Nov09_Falcon_09-09-15 | 5.08e-09   | 2.64      | index=13785 | 2      | K.KSSKACEEERRR.E                      | trypsin/HPRP |
| Euplotes_1_HPRP_1_20_17Nov09_Falcon_09-09-15 | 1.91e-11   | 0.00      | index=3425  | 1      | K.LINDLTNDK.A                         | trypsin/HPRP |
| Euplotes_1_HPRP_1_22_17Nov09_Falcon_09-09-15 | 6.65e-11   | 1.67      | index=3600  | 2      | K.LISELTSEK.S                         | trypsin/HPRP |
| Euplotes_1_HPRP_1_22_17Nov09_Falcon_09-09-15 | 2.55e-10   | 0.78      | index=3602  | 1      | K.LISELTSEK.S                         | trypsin/HPRP |
| Euplotes_1_HPRP_1_22_17Nov09_Falcon_09-09-15 | 1.89e-09   | 0.49      | index=2595  | 2      | K.IVENFNK.I                           | trypsin/HPRP |
| Euplotes_1_HPRP_1_23_17Nov09_Falcon_09-09-15 | 3.01e-13   | 1.01      | index=2200  | 2      | K.LSQEHLISYISR.L                      | trypsin/HPRP |
| Euplotes_1_HPRP_1_24_17Nov09_Falcon_09-09-15 | 2.45e-16   | 1.41      | index=2709  | 2      | K.LINDLTNDKANLK.D                     | trypsin/HPRP |
| Euplotes_1_HPRP_2_06_22Nov09_Falcon_09-09-15 | 6.80e-07   | 2.95      | index=13369 | 2      | E.NFNKIKGQEEEEE.Y                     | Glu-C/HPRP   |
| Euplotes_1_HPRP_2_08_25Nov09_Falcon_09-09-15 | 3.78e-17   | 0.19      | index=9982  | 3      | E.SVNRENLDNEKLINDLTNDKANLKDIVFDLMFE.K | Glu-C/HPRP   |
| Euplotes_1_HPRP_2_08_25Nov09_Falcon_09-09-15 | 3.33e-07   | 0.57      | index=9974  | 4      | E.SVNRENLDNEKLINDLTNDKANLKDIVFDLMFE.K | Glu-C/HPRP   |
| Euplotes_1_HPRP_2_09_17Nov09_Falcon_09-09-17 | 5.74e-16   | 0.44      | index=10771 | 3      | E.NLDNEKLINDLTNDKANLKDIVFDLMFE.K      | Glu-C/HPRP   |
| Euplotes_1_HPRP_2_09_17Nov09_Falcon_09-09-17 | 5.03e-07   | 1.11      | index=10770 | 4      | E.NLDNEKLINDLTNDKANLKDIVFDLMFE.K      | Glu-C/HPRP   |
| Euplotes_1_HPRP_2_12_17Nov09_Falcon_09-09-17 | 2.09e-09   | 0.43      | index=3933  | 3      | E.NKIRFFAAPEKIFE.T                    | Glu-C/HPRP   |
| Euplotes_1_HPRP_2_12_17Nov09_Falcon_09-09-17 | 1.62e-07   | 0.07      | index=3930  | 2      | E.NKIRFFAAPEKIFE.T                    | Glu-C/HPRP   |
| Euplotes_1_HPRP_2_15_17Nov09_Falcon_09-09-17 | 2.83e-07   | 1.61      | index=1758  | 2      | E.MQDEEILKSIEESKLEQEEEEKNE.E          | Glu-C/HPRP   |
| Euplotes_1_HPRP_2_21_22Nov09_Falcon_09-09-17 | 2.17e-07   | 0.10      | index=6671  | 1      | E.VYLGLMEEYE.A                        | Glu-C/HPRP   |
| Euplotes_1_HPRP_2_22_22Nov09_Falcon_09-09-17 | 2.12e-08   | 0.88      | index=6753  | 1      | E.VYLGLMEEYE.A                        | Glu-C/HPRP   |

### 3 Manual Validation

Manual validation was performed by LCMSSpectator. The spectra that have passed the consensus opinion of 5 independent experts are shown below. Necessary raw and mzIdenML files to reproduce the analysis are available at <http://dx.doi.org/10.6019/PXD004333>. Note, the MS/MS scan number is not the same identifier as spectrumID in the table above.

#### SAQEEQDDEVIIDDQNPLLEDDLQIDEPEQK

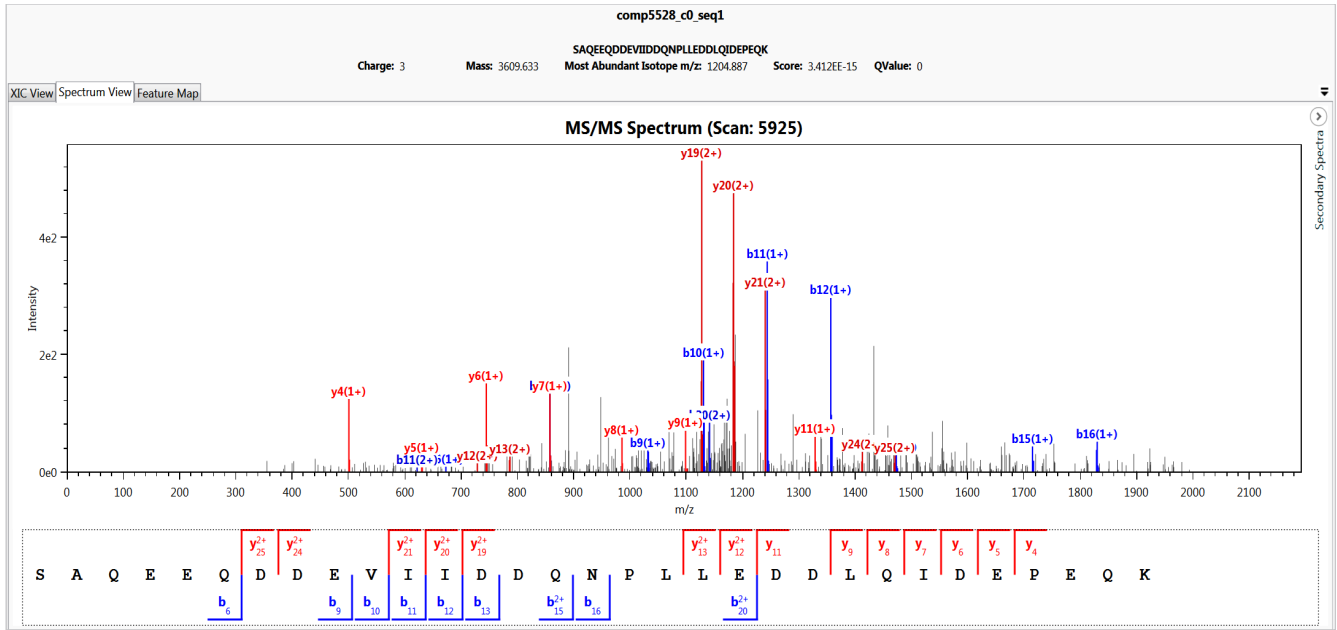

#### SVNRENLDNEKLINDLTNDKANLKDIVFDLMFE

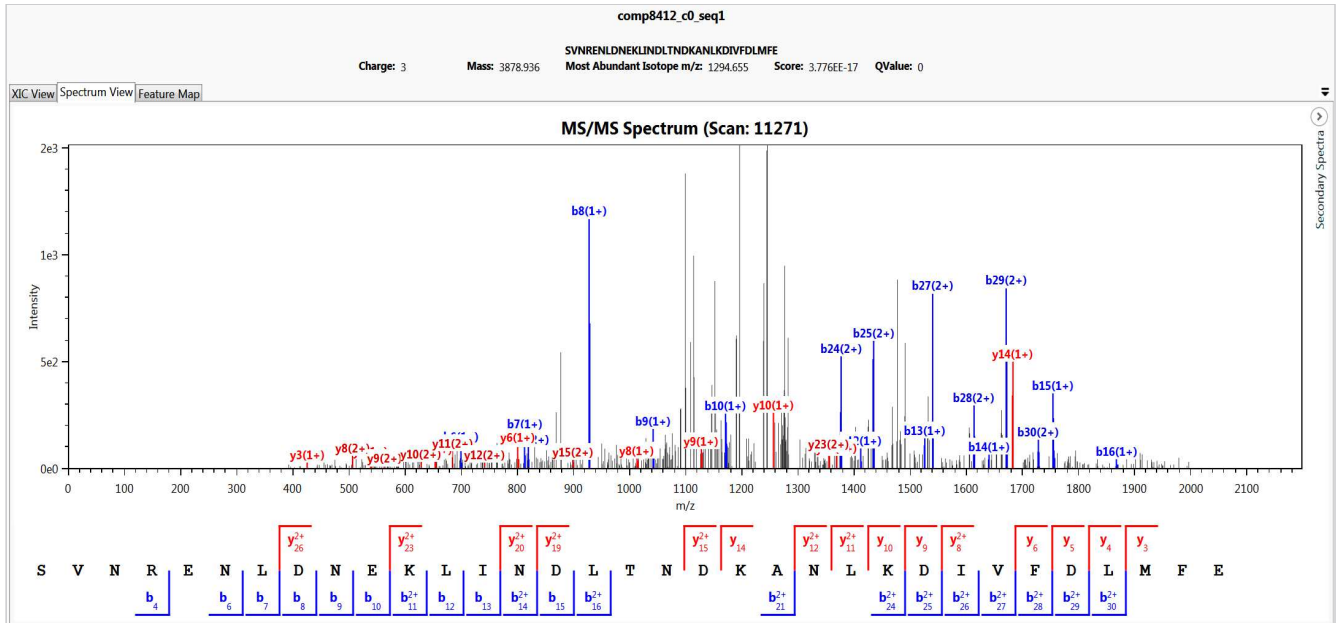

####

WTPIDL PSEITFVQGIQTVTGAGDPSMK

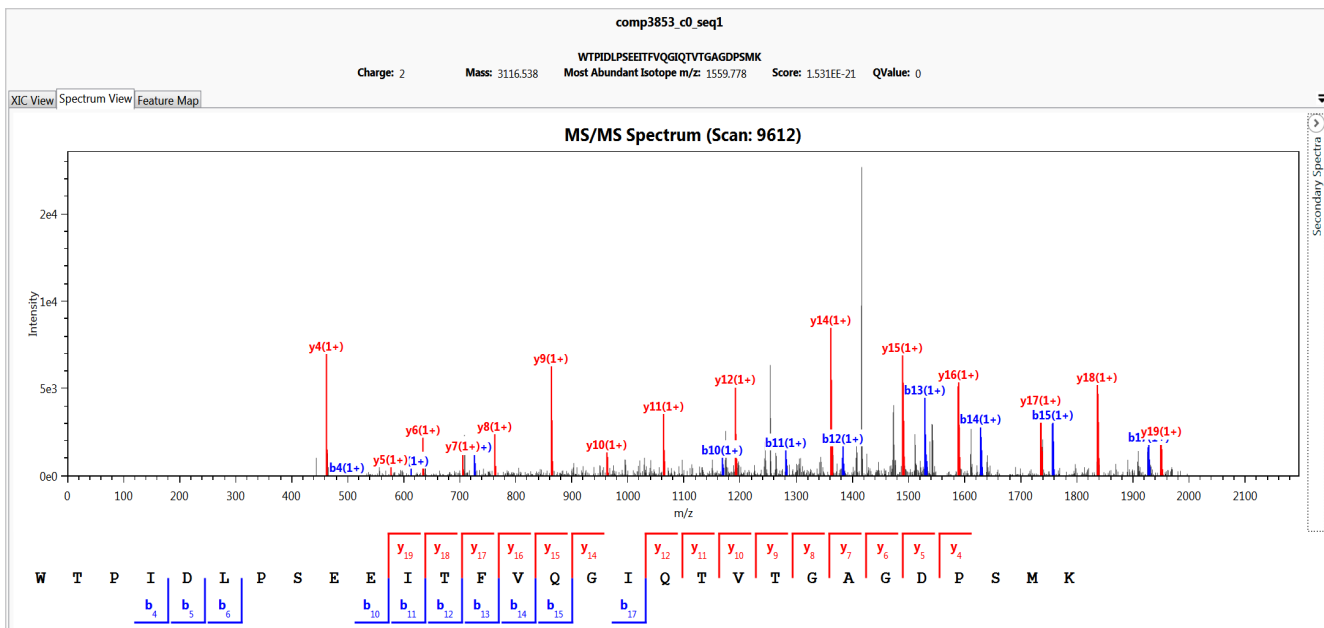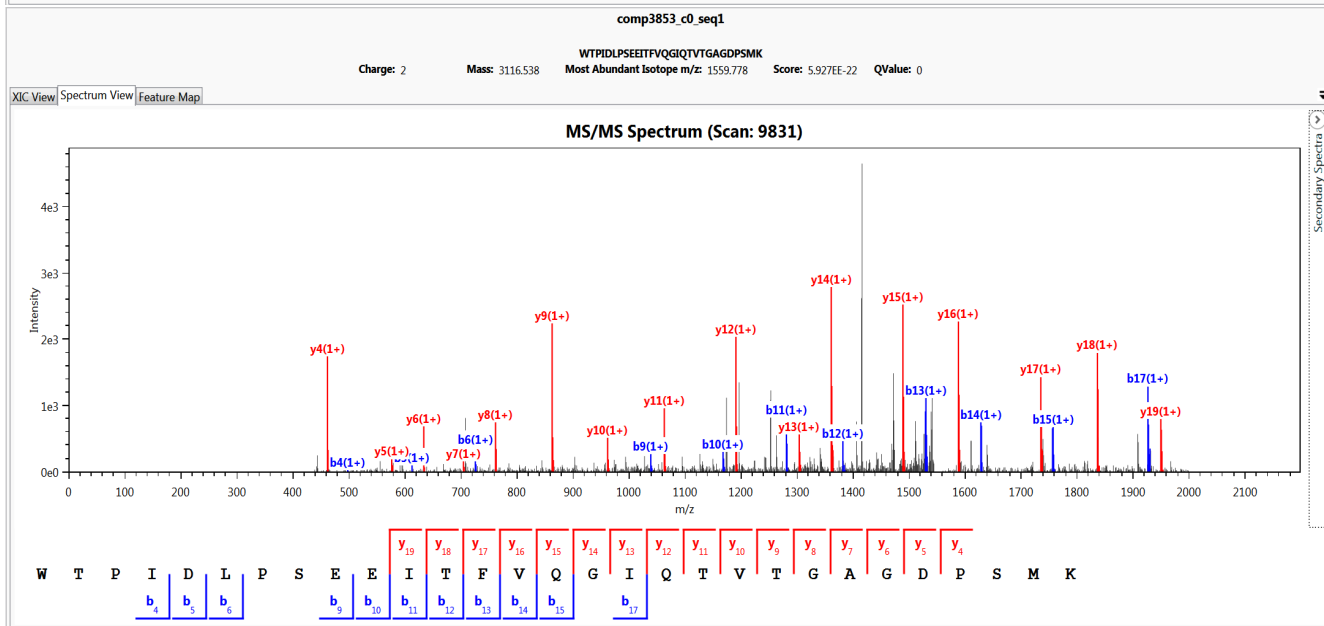

ESNHNNNDITNKNEIAYILR

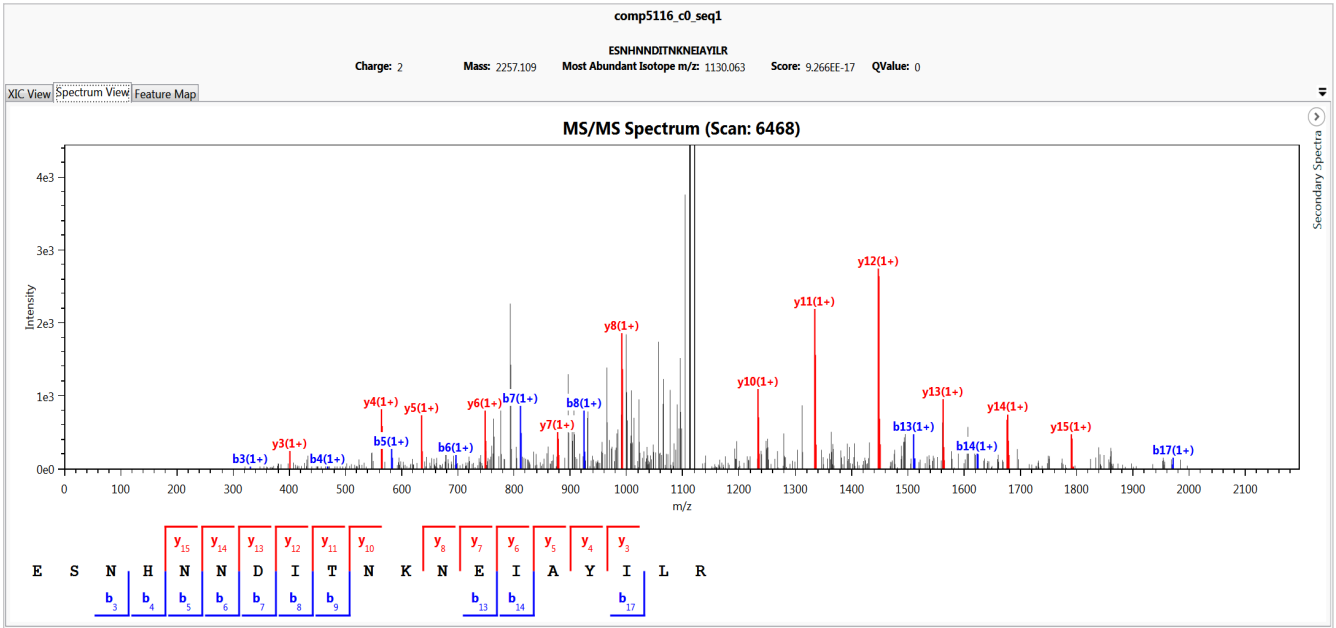

FFAAPEK

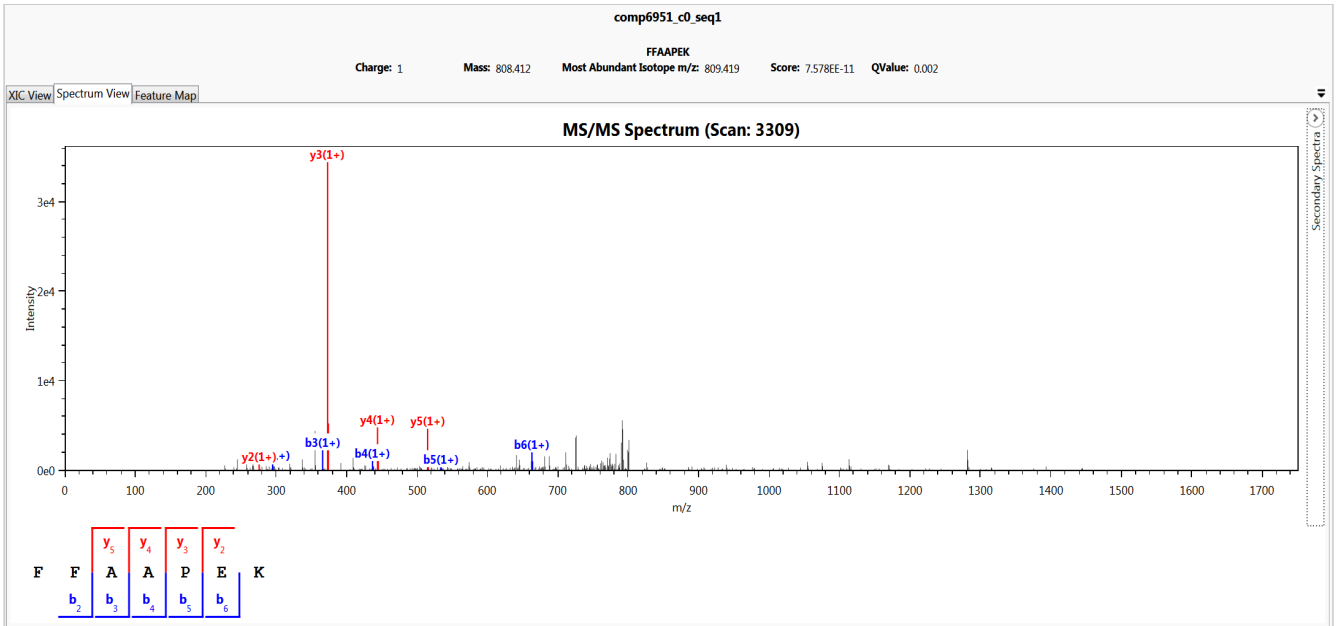

IIQNFQINTVFEDLDEIMQTQVQR

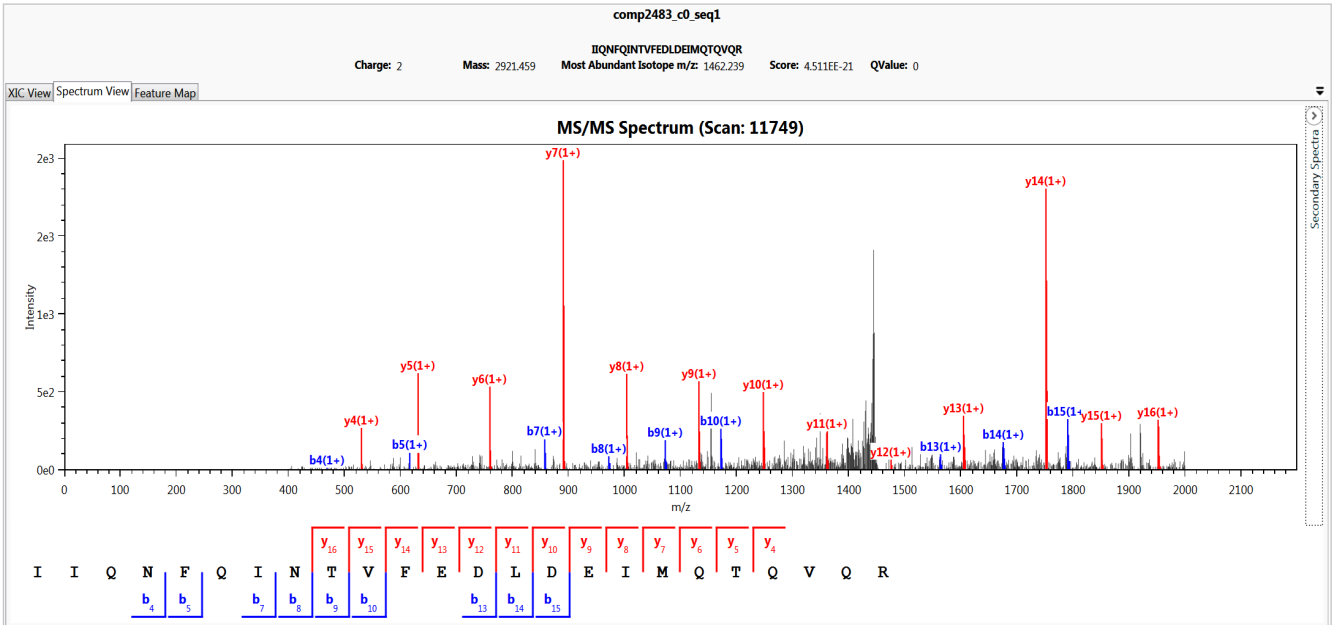

LINDLTNDK

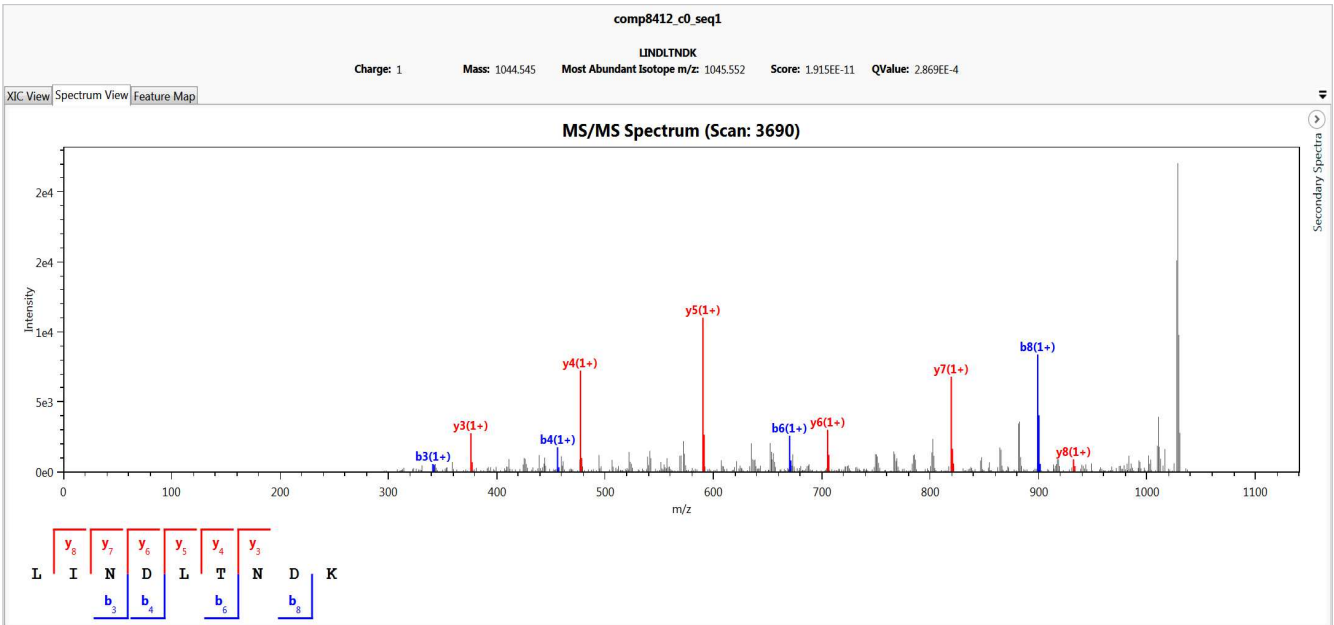

LINDLTNDKANLK

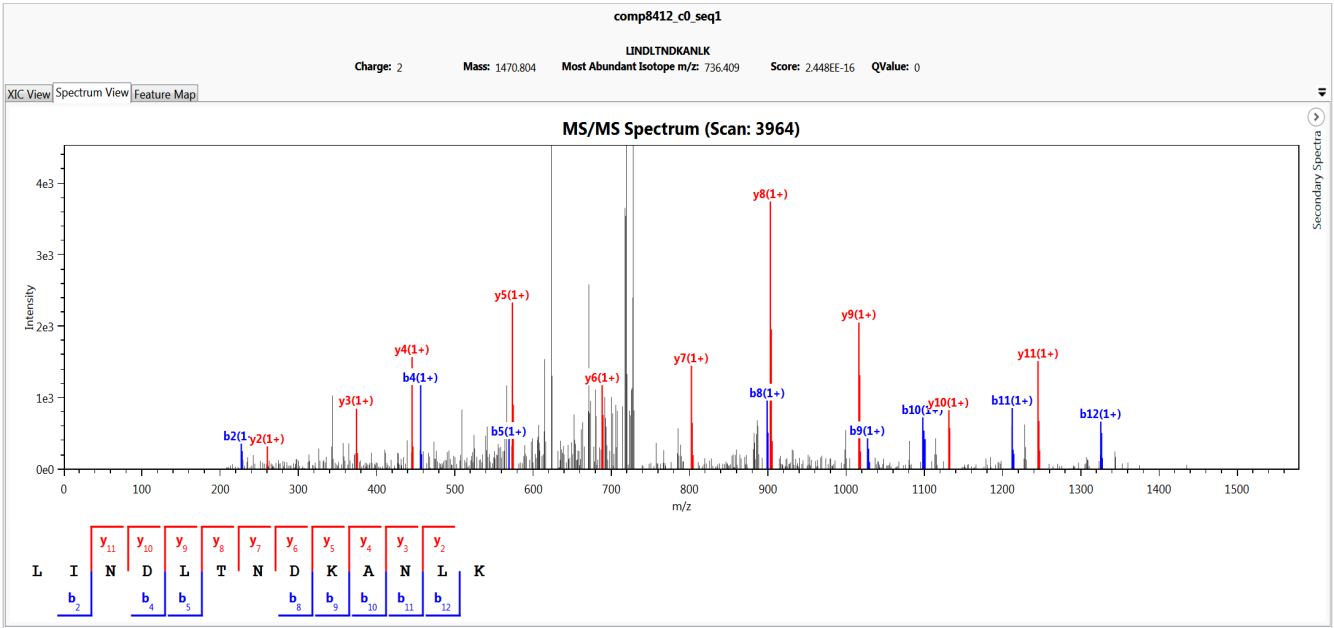

IVENFNK

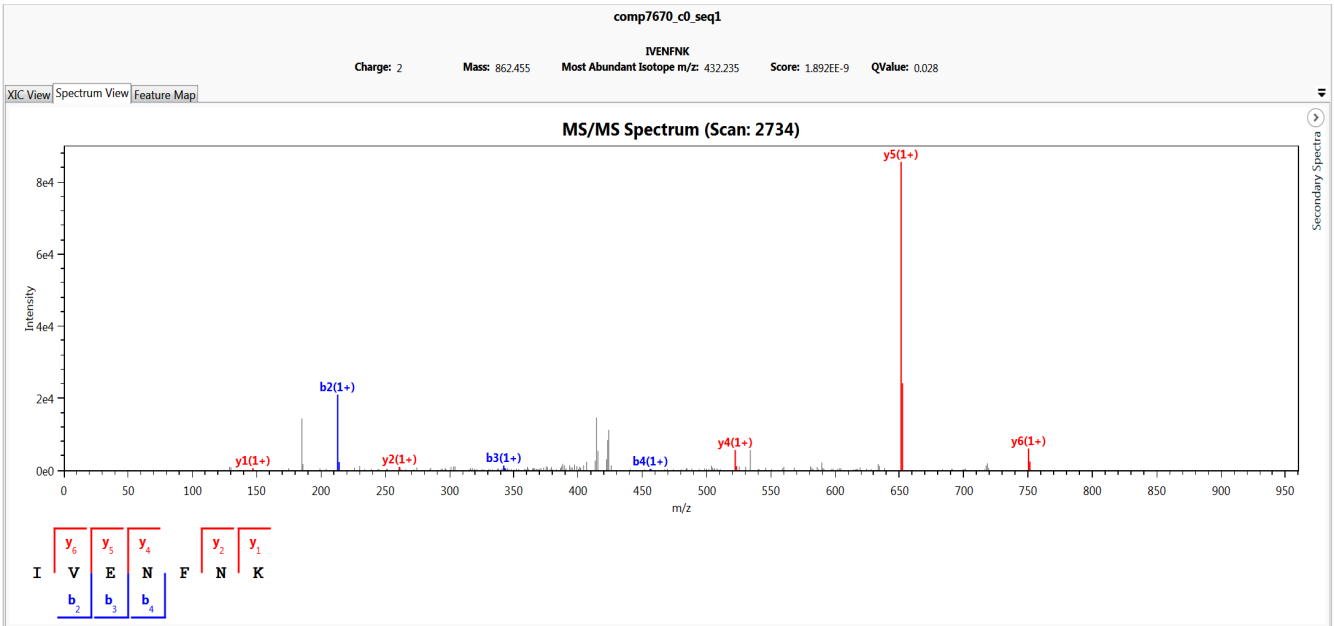

## LISELTSEK

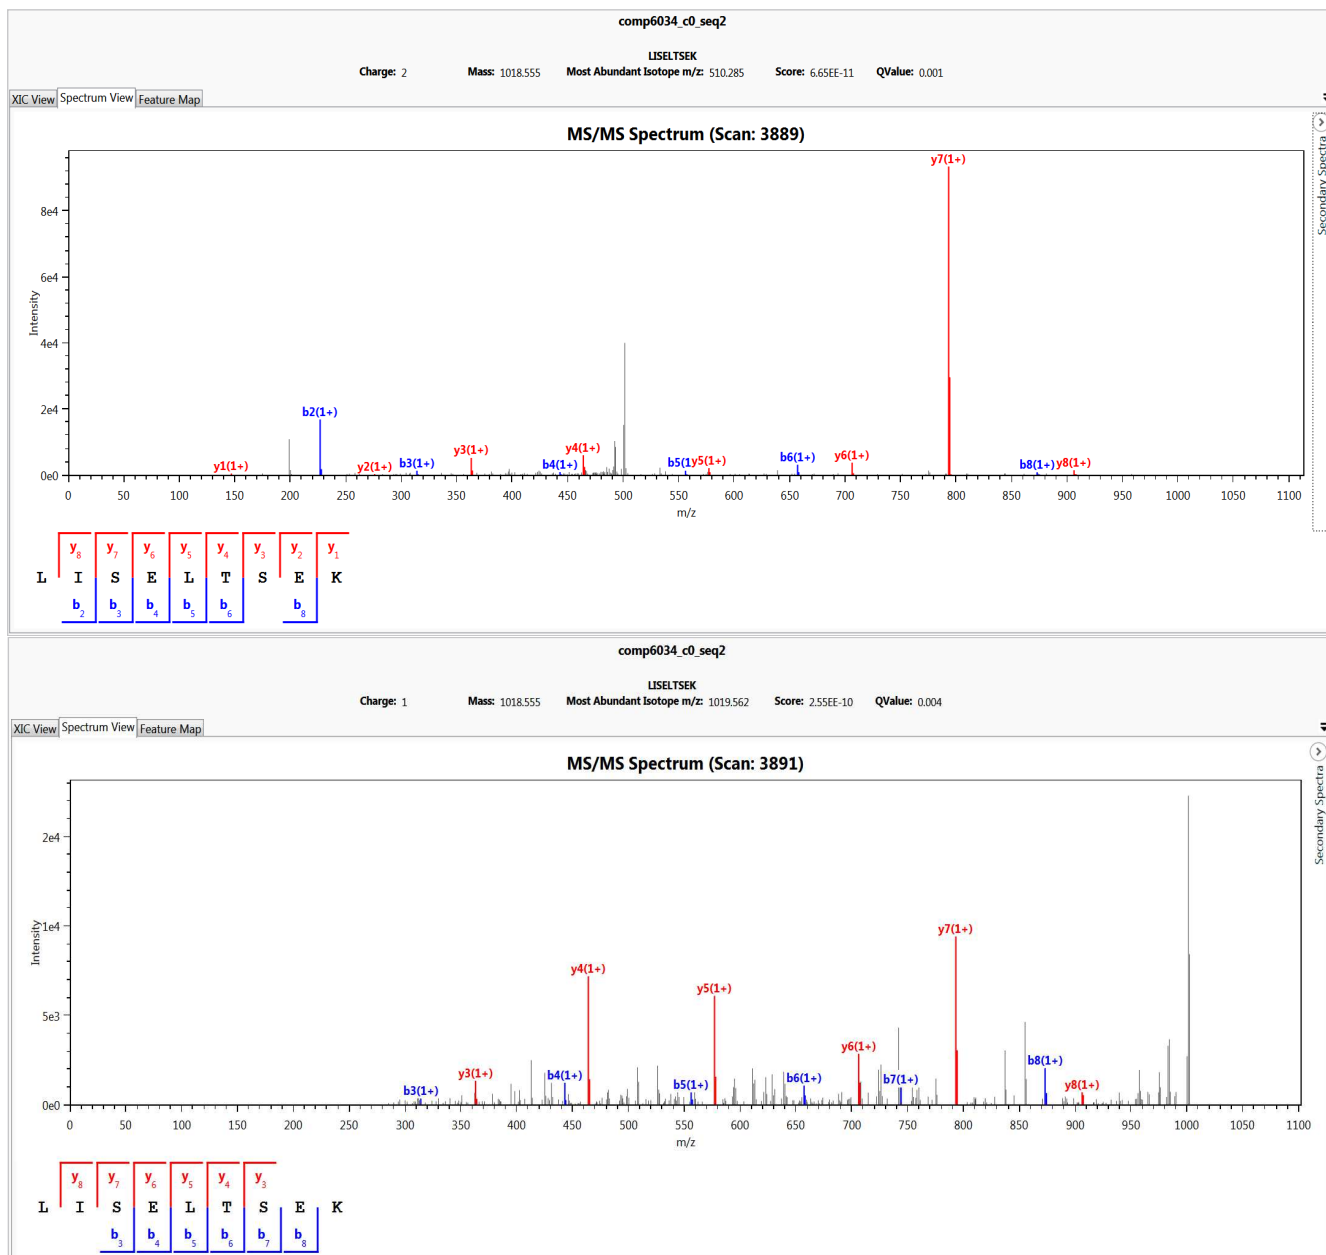

LSQEHLISYISR

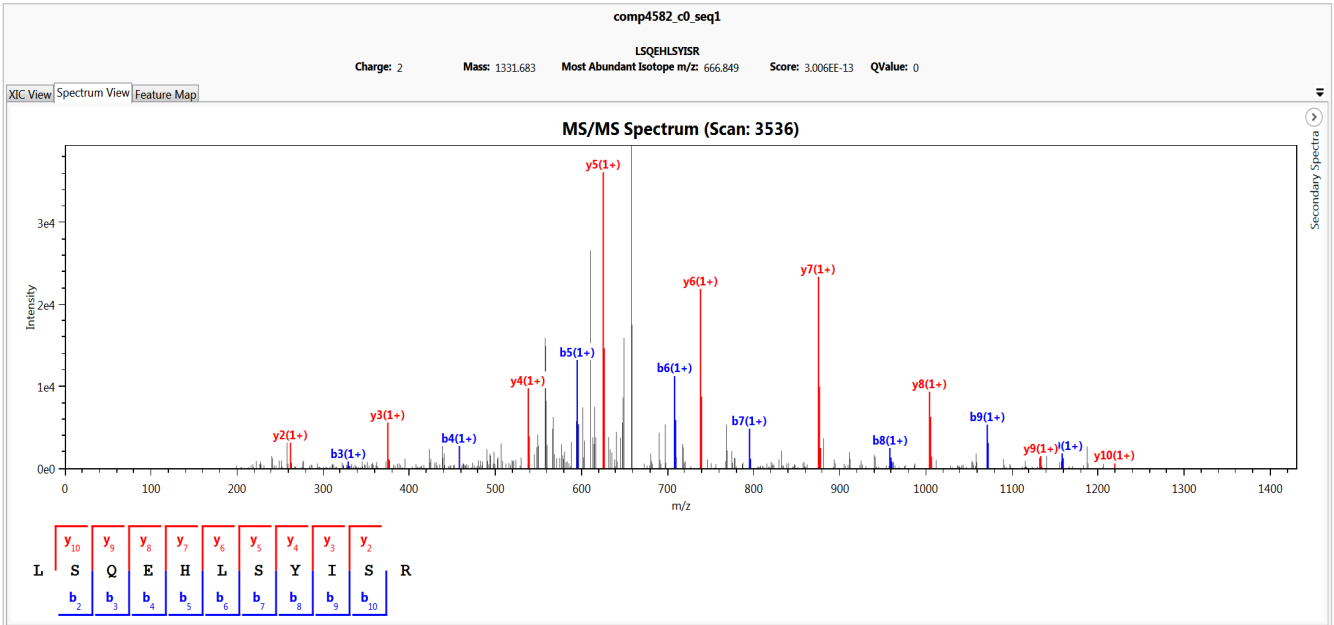

NKIRFFAAPEKIFE

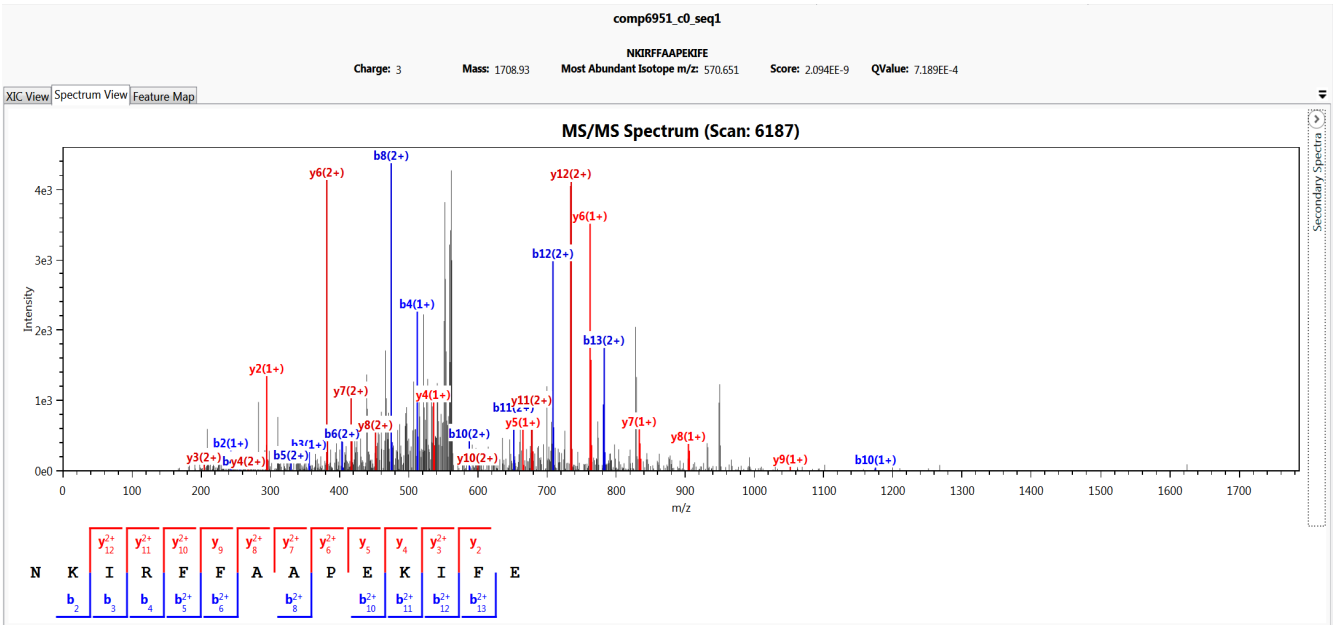



VYLGLMEEYE

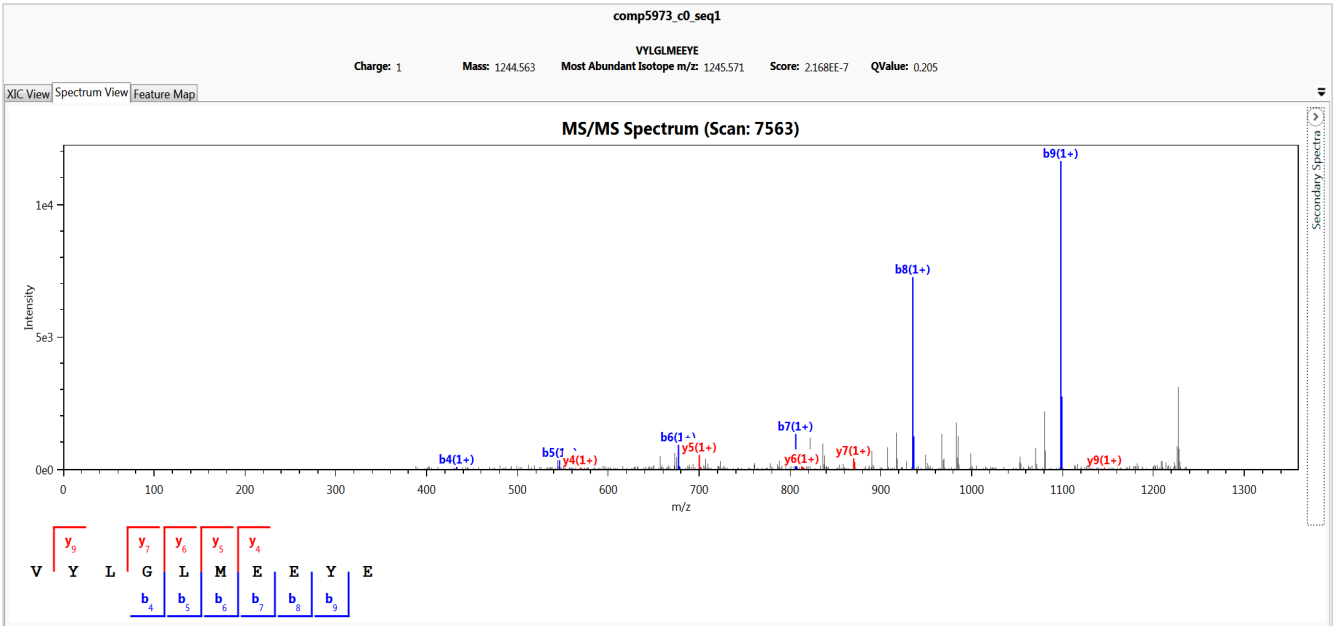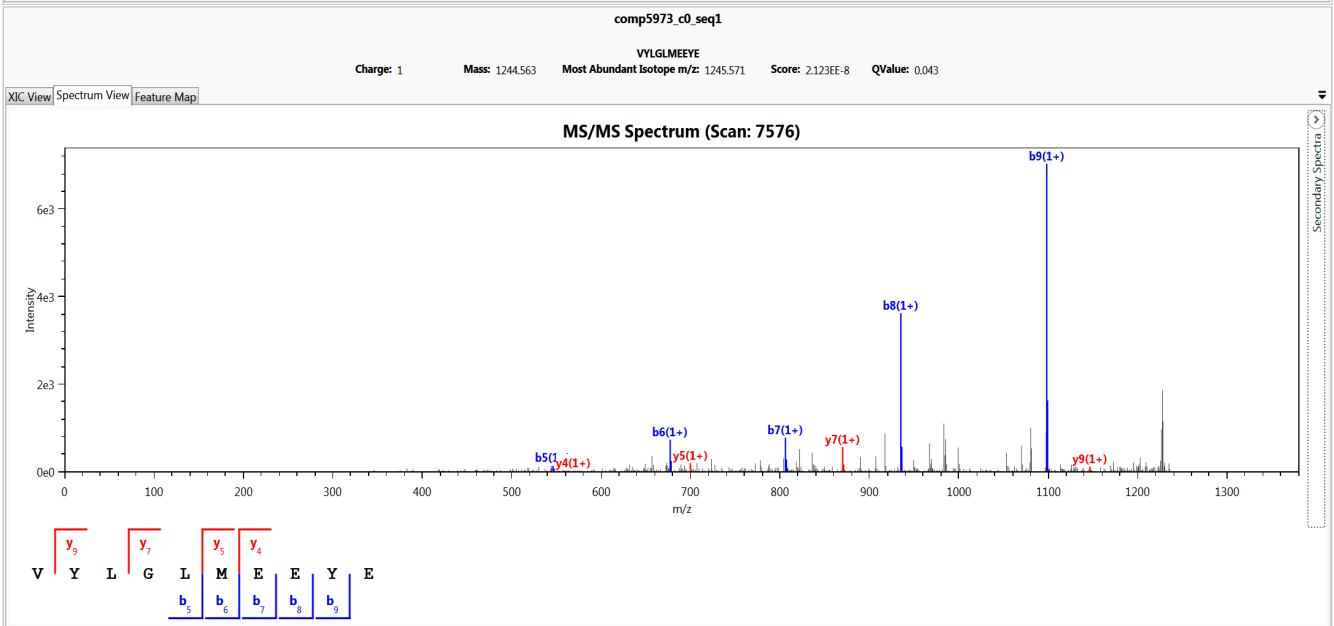

## 4 Session Information

---

All software and respective versions used in this document, as returned by `sessionInfo()` are detailed below.

- R version 3.2.4 (2016-03-10), x86\_64-apple-darwin13.4.0
- Locale: en\_US.UTF-8/en\_US.UTF-8/en\_US.UTF-8/C/en\_US.UTF-8/en\_US.UTF-8
- Base packages: base, datasets, graphics, grDevices, methods, parallel, stats, stats4, utils
- Other packages: BiocGenerics 0.16.1, BiocStyle 1.8.0, Biostrings 2.38.4, dplyr 0.5.0, IRanges 2.4.8, knitr 1.12.3, MSnID 1.7.3, Rcpp 0.12.7, rpx 1.6.0, S4Vectors 0.8.11, xtable 1.8-2, XVector 0.10.0
- Loaded via a namespace (and not attached): affy 1.48.0, affyio 1.40.0, assertthat 0.1, Biobase 2.30.0, BiocInstaller 1.20.3, BiocParallel 1.4.3, bitops 1.0-6, chron 2.3-47, codetools 0.2-14, colorspace 1.2-6, data.table 1.9.6, DBI 0.5-1, digest 0.6.10, doParallel 1.0.10, evaluate 0.8.3, foreach 1.4.3, formatR 1.3, futile.logger 1.4.3, futile.options 1.0.0, ggplot2 2.1.0.9000, grid 3.2.4, gtable 0.2.0, highr 0.5.1, htmltools 0.3.5, impute 1.44.0, iterators 1.0.8, lambda.r 1.1.9, lattice 0.20-33, lazyeval 0.2.0, limma 3.26.9, magrittr 1.5, MALDIquant 1.14, MSnbase 1.18.1, munsell 0.4.3, mzID 1.8.0, mzR 2.4.1, pcaMethods 1.60.0, plyr 1.8.4, preprocessCore 1.32.0, ProtGenerics 1.2.1, R.cache 0.12.0, R.methodsS3 1.7.1, R.oo 1.20.0, R.utils 2.3.0, R6 2.1.2, RCurl 1.95-4.8, reshape2 1.4.1, rmarkdown 0.9.5, scales 0.4.0, stringi 1.1.1, stringr 1.1.0, tibble 1.2, tools 3.2.4, vsn 3.38.0, XML 3.98-1.4, yaml 2.1.13, zlibbioc 1.16.0

### SUPPLEMENTARY NOTE 3. Representative profiles of ribosome density mapped to *E. crasus* transcripts and supporting BLAST hits alignments.

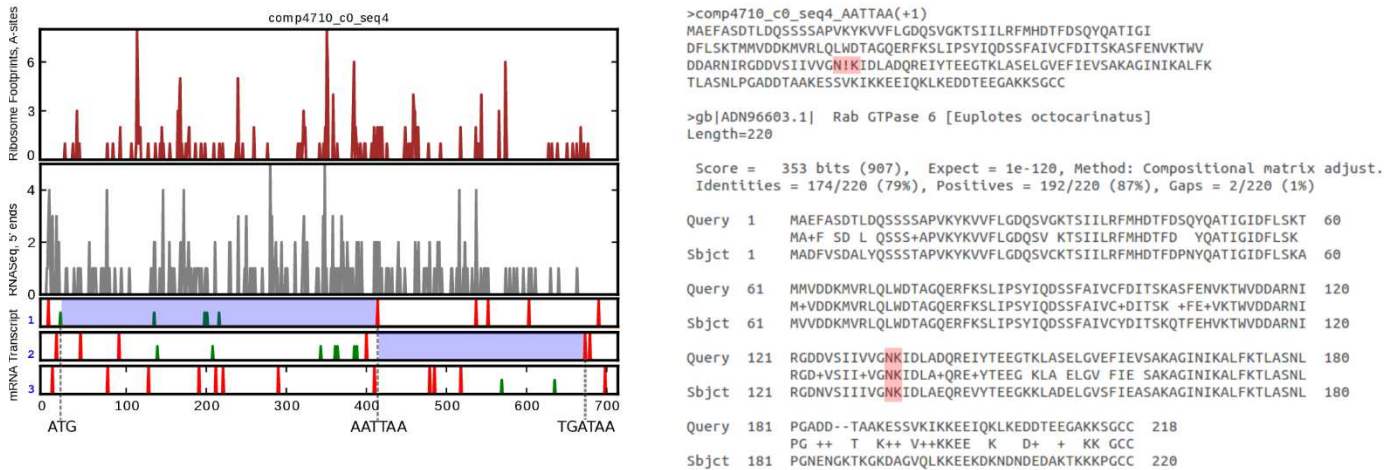

**Supplementary Note Figure 1. Supporting information for +1 frameshifting at AAT\_TAA.** Left panel: density of ribosome footprints (top) and mRNA-seq reads (middle) for a transcript whose ORF is shown at the bottom (red lines correspond to stop codons, and green lines to ATG codons). Identity of stop codons and adjacent 5' codons is indicated for the frameshift site and for the site of termination. Translated segments of ORFs are highlighted in blue. Right panel shows protein sequence produced with inferred frameshifting (top) and its alignment to the closest BLAST hit (bottom).

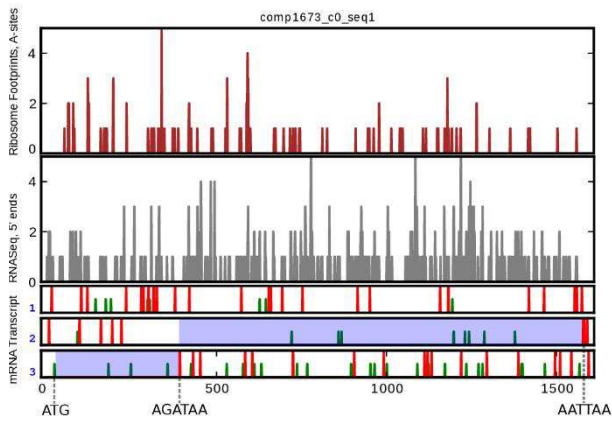

```

>comp1673_c0_seq1_AGATAA(+2
MEGGNQGPYNVGEPTKILHLISCRKLADLDIITVSDPVCHVVIADSDHPDDW
MLYGKTEQIENNLNPDFVTFYFEMDYFFEKIQIKVEFVDVTRLERIGNFETTLGEMG
SVNTTLTEGR!ILRTEKVATSNLIYFSLRINDLVSNKGWFCGSDDPFIFIERARENDQE
EFLRVIQTEPIRNDLNPTWRYLKYEAIKCNGLQCPKFKVYSWRNSGHHKFFGEFETT
MLRIRNGDTQYNLFKDKGAQQKSIKCSFEFFIEERASFFDFLHSGWKMMLMVCVDFASNG
EVTVPSSLHYLNPTGEFNDYQNAIRQVGNILELYDYNRQYPCYGGGIPRYSGSNQVSHC
FHLNGLEDPEVDGVNGILESYQFSLNCGLYGPTNFGECKRKTVDYIKERMDERMYHILLI
ILDGDIDHMPITRDIIVEGSHYPLSIIIGLGESSFDMKIELDGDVVLKNTREGATR
DIVQFVKFDFRHLKSKQALAEVLEEVPEQVVSYSQNNKILDEVN

>emb|CDW78601.1| copine family protein [Stylonychia lemnae]
Length=554

Score = 420 bits (1080), Expect = 3e-137, Method: Compositional matrix adjust.
Identities = 211/516 (41%), Positives = 330/516 (64%), Gaps = 21/516 (4%)

Query 16 EKILTHISCRKLADLDIITVSDPVCHVVIADSDHPDDWMLYGKTEQIENNLNPDFVTFYFE 75
++++L ISCR L +LD+++ SDP+C VVI D +W L GKTE I NNLNPDF +
Sbjct 19 QRVLSISCRNLKNDLVLSKSDPMCEVYIKDR-KTTNWTLLGKTETINNLNPDFSSIIY 77

Query 76 MDYFFEKIQIKVEFVDV---TRLERIGNFETTLGEMGSVN-----TTLTE 121
DY+FE+ Q IK +++D+D T + IG+ ETTLG I+GS+ +T +
Sbjct 78 CDYFFEREQNIKFDLYIDNQHTSRDFIGSNETTLGGIIGSMQTYVADLKDNKSTRSR 137

Query 122 GRIL-RTEKVATSNLIYFSLRINDLVSNKGWFCGS-DDPFIFIERARE-NDQEEFLRVI 178
G+I+ R + V T+ND + LR++ V + CG+ D+P+ I RAR+ N+ ++F+RV
Sbjct 138 GKIIVRLDNVNTTNDV--RLRVSARVQSNAGCCGTQDNPPYIISRARDVNNHKDFVRVY 195

Query 179 QTEPIRNDLNPTWRYLKYEAIKCNGLQCPKFKVYSWRNSGHHKFFGEFETTLRIRN 238
++ + N P W K + +ICNG P+KF++YS SG + +GE T++ +++
Sbjct 196 KSSAMLNSTQPMNVQKIKLSQICNGINLPIKFELYSQNISGTDQAYGEGITSIEQLQS 255

Query 239 GDTQYNLFKDKGAQQKSIKCSFEFFIEERASFFDFLHSGWKMMLMVCVDFASNGEVTVPS 298
G + + K + + F I E + F ++L SGW +N+ +D+TASNGE T P+
Sbjct 256 GQKSVEITDKKRKIKGSLNIDNFVIREMPNFMEYLRSGWAINMSFAIDYASNGEKTDPN 315

Query 299 SLHYLNPTGE-FNDYQNAIRQVGNILELYDYNRQYPCYGGGIPRYSGSNQVSHCFHLNG 357
SLH +P+G N Y+ A+ VG ++E Y N+ + +GFGGIPR++GSNQ+SHCF+LNG
Sbjct 316 SLHKQDPSGRNLNQYEQALLSVGKVMPEYALNQMFATFGGGIPRFTGSNQISHCFNLNG 375

Query 358 LEDPEVDGVNGILESYQFSLNCGLYGPTNFGECKRKTVDYIKERMDERMYHILLILTGD 417
P++ G+ + +Y+ ++ GL GPT+F ++ + Y+++ + +MYH L+I+TDG
Sbjct 376 SVSPQIQGLQNVYMAKRTIHQIGLAGPTHFSSVLQSLLVYVQCLQFQMYHCLMIITDG 435

Query 418 DIHDPITRDIIVEGSHYPLSIIIGLGESSFDMKIELDGDVVLKNTREGATRDIIVQF 477
+IHDMP T D+IVE S +P+SIIIIIG+G F+KM LD D+ L+N++G+ RDIVQF
Sbjct 436 EIHDMPATIDLIVELSRFPVSIIGVGNEGFEKMNFLDSDNQLRNSKQVAARDIVQF 495

```

**Supplementary Note Figure 2. Supporting information for +2 frameshifting at AGA\_TAA.** See Supplementary Fig. S8 for the legend.

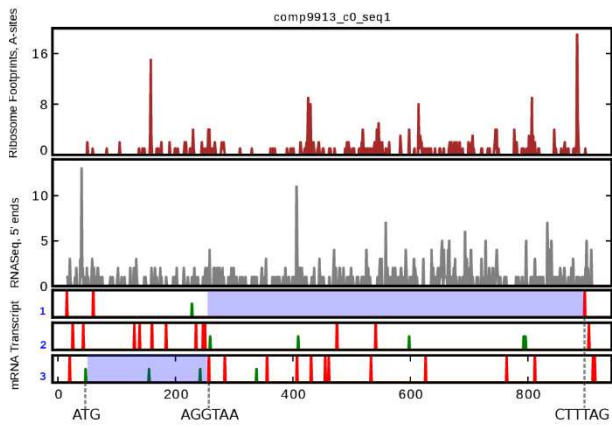

```

>comp9913_c0_seq1_AGGTAA(+1)
MSRILERSGVSNNPLNCSTAKQF5FSKADRFQQTMTRGLSSGY
LNLPSTRSTRSTTFQYVDKIMTKR!RNDSPSPGTYKIPSGFEPGKKGVYSFRCSWKSYS
KVVYQKEGFQNTKASDPNVPGPGTYKSVPTFGNKGKFTLKGKLDLPSSVKVPGPGAYKD
LTTLPRTGRNFYSKFKSVCNGAIGPPTNTRFKDQQTSAEIPGPGQYTPKTLTGTGHYF
LSRFKSSGTTVLGGARRASTHRVSDNGPGPGSYILPSDFGYPTSFHRRRKSRRATSQL

>gb|EJY73919.1| hypothetical protein OXYTRI_04827 [Oxytricha trifallax]
Length=322

Score = 170 bits (430), Expect = 1e-46, Method: Compositional matrix adjust.
Identities = 111/289 (38%), Positives = 150/289 (52%), Gaps = 36/289 (12%)

Query 1  MSRILERSGVSNNPLNCSTAKQF5FSKADRFQQTMTRGLSSGYLNLPSTRSTRSTTFG 60
MS+++ ++ +P+N ST+KQ F5FSKA+RFQQ + +LPS +STR+ G
Sbjct 1  MSQVVSTPQQINQHPVNNSTSKQLF5FSKAERFGQPKSMNHRIAYDLPSMKSTRAAGLG 60

Query 61  YGDKIMTKR!RNDSPSPGTYKIPSGFEPGKKGVYSFRCSWKSYSKVVYQKEGFQNTKASDP 120
YG + N RNDSPSP Y + S F K +SF S ++YSKVY KE +D
Sbjct 61  YGSRNAFNIRNDSPSPTNYNLKSEFTKSPSNKAFSFGISREAYSKVYIKEN----PLADA 116

Query 121  NVPGPGTYKSVPTFGNKGKFTLKGKLDLPSSVK--VPGPGAYKDLTTLPRTRGRNFYSK 178
+VPGPG Y+ P G + K+TL+ K ++ + PGGG Y L G F SK
Sbjct 117  SVPGPGQYQIPPIVIGKEALKYTLRPKTQNPYTYKQPPGGQYDTKPALNDKGLYFNSK 176

Query 179  FKSVCNGAIGPPTNTRFKD-----QTQSAEIPGPGQYTPKTLTGTGHYFLS 226
FK+ +I PP++ RFKD Q +PGPG Y P + TG YF+S
Sbjct 177  FKNSSATSIDPPSSVRFKDINGKLVFDVNNIQLGKRVPVPGPGTYQNPNIEMNKTGSYFVS 236

Query 227  RFKS-----GTTVLGGARRASTHRVSDNGPGPGSYILPSDFGY 265
F+S5 T +LG + + PGGG+Y LP5DFGY
Sbjct 237  NFKS5MCRSHYHFDRTNILGSTMKGT-----PGGNVRLPSDFGY 277

```

**Supplementary Note Figure 3. Supporting information for +1 frameshifting at AGG\_TAA.** See Supplementary Fig. S8 for the legend.

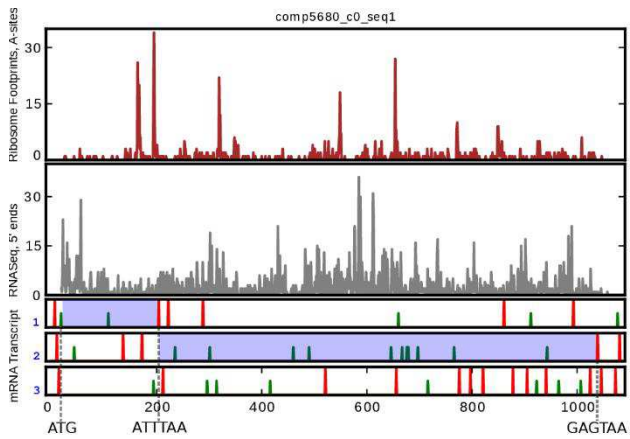

```

>comp5680_c0_seq1_ATTAA(+1)
MSLPRYYANACVDKPESEYDYTNFELSWGPMDDYEVVQKIGRGKYSEVFDGVTN
LNNQKCVI[K]ILKPKIKLEKMQREIKILQTLYGGKNIKLYDMAQDDVSEVTALVFERVNH
DHKVLYKQKDFDIRYYIYEVLLGLDYCHSLGIMHRDIKPHNIMIDHEQRQLRIDWGLA
EYYIPGKEYNVRVASRYKGPPELLVDDRLYNYSLDMWSLGTMANMMFQRDPMPKGVND
DQLIKIVEICIDGLMDYLKTYKLEINRYHQKHLKNWEKVSWEFEITKKNKHLVTKEALD
FLEKCLQYDREKRIMPQEAIEHEYFAPVIEYKKKIHGGGEVKTTEE

>gb|EJY69411.1| Casein kinase II subunit alpha [Oxytricha trifallax]
Length=333

Score = 392 bits (1008), Expect = 3e-132, Method: Compositional matrix adjust.
Identities = 181/330 (55%), Positives = 249/330 (75%), Gaps = 2/330 (1%)

Query 1 MSLPRYYANACVDKPESEYDYTNFELSWGPMDDYEVVQKIGRGKYSEVFDGVTN 60
      M+LP+YYAN C + P Y DY N+E+ +G + YE+++KIGRGKYSEV++G+NTLNN++
Sbjct 1 MNLKPYANVCEEMPPEYSDYENYEVKFGSQENYEIIKKIGRGKYSEVYEGINTLNNERI 60

Query 61 VIKILKPKIKLEKMQREIKILQTLYGGKNIKLYDMAQDDVSEVTALVFERVNH--TDHKV 118
      VIKILKP+K K++REIKILQTL G NII L D+ +D +++ AL+ E V+ D +
Sbjct 61 VIKILKPVKTKIRREIKILQTLKNGINIINLIDVVRDPMTKTPALIMEVDTGDVDFRT 120

Query 119 LYKQKDFDIRYYIYEVLLGLDYCHSLGIMHRDIKPHNIMIDHEQRQLRIDWGLAEYYI 178
      LYK F DFDIRYY++E+L LD+CHS GI HRD+KPHNIMIDH R+LR+IDWGLAE+Y
Sbjct 121 LYKSFTDFDIRYYMFEILKALDFCHSKGITHRDVVKPHNIMIDHASRKLRLIDWGLAEFYH 180

Query 179 PGKEYNVRVASRYKGPPELLVDDRLYNYSLDMWSLGTMANMMFQRDPMPKGVNDNDQLI 238
      PG+EYNVRVASRY+KGPPELL+D + Y+YSLD+WSLGC + M+FQ++P F+G DN DQL+
Sbjct 181 PGQEQNVRVASRYFKGPPELLIDLQTYDYSLDIWSLGCMSFGMIFQKPEFFQKGDNDYDQLV 240

Query 239 KIVEICIDGLMDYLKTYKLEINRYHQKHLKNWEKVSWEFEITKKNKHLVTKEALDFLEK 298
      KI ++ G + L Y++ Y + ++ ++ L K W +FI N+HLV++EALD L K
Sbjct 241 KIAKVLGTEELYAYIEKYVNTLDSHYDDILQHTKPKWHKFINANEHLVSEALDLLSK 300

Query 299 CLQYDREKRIMPQEAIEHEYFAPVIEYKKK 328
      L+YD +RI+P++A++H YF PV E+ K
Sbjct 301 MLKYDHAERIVPKDAMDHPYFKPVKEFHAK 330

```

**Supplementary Note Figure 4. Supporting information for +1 frameshifting at ATT\_TAA. See Supplementary Fig. S8 for the legend.**

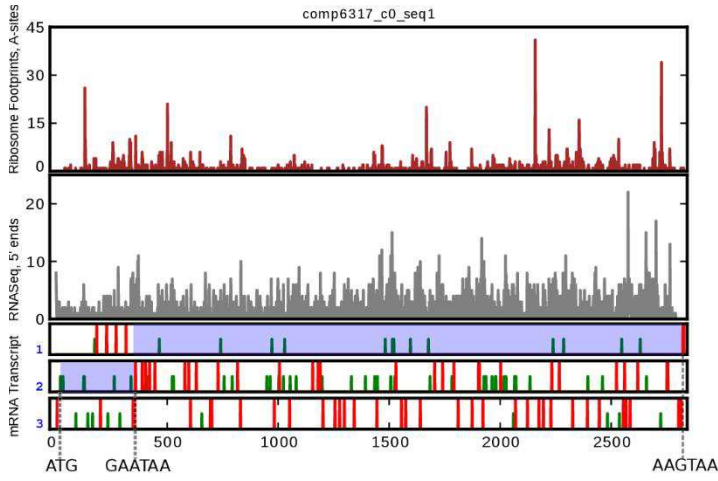

```
>comp6317_c0_seq1_GAATAA(+2/-1)
MSSYMKKSSLEELKIELNSLKVDEQKAVKQVIAMMTIGKDVSLFPHVTKCI
LSPSIELKLVLYIINYAKSPDLTMAVSAFTKDAHEKSNPLRALAVRTMGCIRIEI
KIATYLCESLKDCLVDDPPYVKKTAASVAKIYHTPEHTKELGFIKLLQGLLQDGNVAV
VANAVAALFEISRVAGKNYLKANKETIGKLLNALNETNEWGQIYILESIINYKPKQKQEA
EEIIERIMPRQLQHANPAVVLGATKNVHFLKFNVLKSNKTTILKLSAPLITLLSSEPEI
QYIALCNILLIQIPNVFEKNVMMFCRFSDPYIYVLAQDVMVGVADNTNVDIITEL
HEYCNIDQDFVRRSVKAIQVQVVKVDRVAKKVEALREHVNQEQGSDSALQEAIVASK
ILRKYPKKFEGLVKDQVQDRIDEPEKSAFIIWILGEYSKIEDAGEKLVYIDSFDE
NINVCLQILTSVAKMFIKDSNYEDMVMNVKLASESSANPDLRDRGVIYWRMLSTDPQ
TKDVLAKRPEVEEDTLKMDDETDFIDIFISDTKHSALRPEKTASAPEDSDEEVEE
EEKPKSKKDKKSKQKVKKEETKEEELPEEVVTEKPKDLDLDFGLIGDDPVSN
DEPAVDPLAGILDEGNGGEGSTQAASPHDDNGLFGGFGASGSEASLFIKSEHAELVSSST
PGSQNKAAGLQIKARFYREGTSIKLDMIFYNSTAGIISDFIMINKNPFLLKPGPISVIP
ISAGQTFTTTVECSIDQSNADLKNPPQCPYVQTAIKNSLDVYVQVPCLLHLLQGTVP
AVTQTCQQMANSIANKHSFTVSSARFAGSADLKRMQNSFPYIYDELNSQIFATSTV
NNIPILLRCTPEGSDIQLIACTPVAPLYQLIEEAIVEISK

>emb|CDW87346.1| ap-2 complex subunit [Stylylonchta lemnae]
Length=1023

Score = 706 bits (1821), Expect = 0.0, Method: Compositional matrix adjust.
Identities = 428/1024 (42%), Positives = 610/1024 (60%), Gaps = 93/1024 (9%)

Query 1 MSSYMK--KSSLEELKIELNSLKVDEQKAVKQVIAMMTIGKDVSLFPHVTKCILSPS 58
M++Y + KSSLE EL+ ELNSLK +E++EA KQVIAMMTIGKDVSL FPH+ KC+ +
Sbjct 1 MTNYFQNMKSSELAELQHELNSLKEPEERAAKQVIAMMTIGKDVSLFPHVTKMETTQ 60

Query 59 IELKLVLYIINYAKSPDLTMAVSAFTKDAHEKSNPLRALAVRTMGCIRIEKIATY 118
+ELKLVLYIINYAK KPDLT+MAV+++F KD+ + +P+++RALAVRTMGCIR+E+I Y
Sbjct 61 MELKLVLYIINYAKVCPDLTMAVNSFQKDSRDIQSPMMRALAVRTMGCIRVERITEY 120

Query 119 LCESLKDCLVDDPPYVKKTAASVAKIYHTPEHTKELGFIKLLQGLLQDGNVAV 178
+CESLK+ L D DPYVKKTA+ VAK++ T P K+ IK+LQG+L DGNA+VVANA
Sbjct 121 MCESLKERLNDQDPYVKKTAALGVAKLFQTSRPLVKDHSLLIKLQGLYDGNVAVANA 180

Query 179 AALFEISRVAGKNYLK-ANKETIGKLLNALNETNEWGQIYILESIINYKPKQKQEAEEI 237
A+L EISR +GKNYL+ N + + KLL ALN+ NEWG+IYILE I +Y + KE+E I+
Sbjct 181 ASLLEISRASGKNYLRKNDQGLNKLKLLIANDANEWGKIYILEGESSYDTSDSKESENI 240

Query 238 ERIMPRQLQHANPAVVLGATKNVHFLKFNVLKSNKTTILKLSAPLITLLSSEPEIQYIA 297
ER++P L H NPAV+L A K VL F+ V+ + I+KKL PLITLLS+E EIQY+A
Sbjct 241 ERVLPMLTHNPAVILSAVKTVLKFMNVSTQDLKGIKLGPPPLITLLSSTAEIQYVA 300

Query 298 LCNILLIQIPNVFEKNVMMFCRFSDPYIYVLAQDVMVGVADNTNVDIITELHEYC 357
L NI ILQ+ ++FE+NV++FFC+++DP+YVKL K+D++V VAD+ NV+ I+ EL EY
Sbjct 301 LRNINFILQKYSHLFEQNVVRFCKYNDPVPVVKLEKIDILVKVADKKNVETILAEKEYS 360

Query 358 NNIDQDFVRRSVKAIQVQVVKVDRVAKKVEALREHVNQEQGSDSALQEAIVASKILRK 417
+ID + V++SV+AIQ+++KVD+ A K VE+ E V QG+ +QEAVIVA I RK
Sbjct 361 GDIDPELVKSVRAIQIILKVDKAASKAVEIIEIVT--QGGEIGVQEAIVAKDIFRK 418
```

**Supplementary Note Figure 5. Supporting information for +2 frameshifting at GAA\_TAA. See Supplementary Fig. S8 for the legend.**

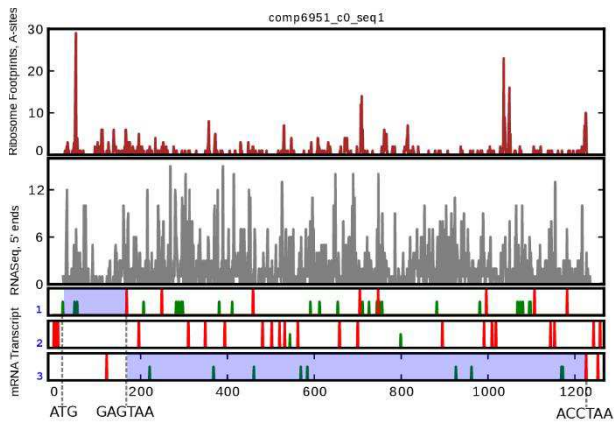

```

>comp6951_c0_seq1_GAGTAA(+2)
MYSTKFRRVMTMAPLLANPALALCEEPSTADIRGNENKIRFFAAPELKIFE
TFSNIREEDGQVYMSYQDFHSLTPYNFVASKDDDDDDDEENKDKKEKEKPGYFDKFTP
EIMTIVDANQDKKIDFNEYIFFITLLQLPEGEVMRIIEKVNPEERKINKAQFAKYLTKLR
KCTALGLKQMSKSFMPDGRKISTDEDHISKITLLHLFNDKEYITIEDFCCLKSKLKHALL
HYEFYQFDVDEDETI SAESFAKSLLSCLNYTQASKYSRRIHSLKLEGRVSFKEYVAFHNL
IEKADIIKMKISTYRFLSLGMFRDLCDDFAKLDPCYNQNKVISDQTATFFKVLDEDEEN
GALEYDEVVDILEGKKNIGLKEDKFKREMMEKIDRYIKKFQKYVGVGT

>emb|CDW75918.1| calciumbinding atopy-related autoantigen [Stylonychia lemnae]
Length=426

Score = 311 bits (798), Expect = 2e-98, Method: Compositional matrix adjust.
Identities = 169/401 (42%), Positives = 246/401 (61%), Gaps = 27/401 (7%)

Query 9 VMTMAPL----LLANPA--LALCEEPSTADIRGNENKIRFFAAPEKIFETFSNIREED 62
M + PL L+ N L+ CEE DRIRGNENKIRFF+ EKIFETFF++ + E
Sbjct 42 AMIITPLAFQMLILNNQHNLSQLCEEAPRQDRIRGNENKIRFFSPPEKIFETFASSKNEK 101

Query 63 GQVMSYQDFHSLTPYNFVASKDDDDDDDEENKDKKEKEKPGYFDKFTPEIMTIVDAN 122
G + MSY DFF +LTPYN KD +P YFDK+ P+I+ + D+N
Sbjct 102 GDVMSYSDFFRALTPYNHSEIKDS----- --KP-YFDKYKPDILKVADSN 144

Query 123 QDKKIDFNEYIFFITLLQLPEGEVMRIIEKVNPEERKINKAQFAKYLTKLRKCTALGLKQ 182
D I F E+ FFIT+LQ+P G + + K E K+N+ +F+K LT LRK T LG KQ
Sbjct 145 GDGVISFPEFFFFITILQMPGLIHKEFTKHVKEGGKMNQDEFSKLTTLRKKTLGLGKQ 204

Query 183 MSKSFMPDGRKISTDEDHISKT---ILLHLFNDKEYITIEDFCCLKSKLKHALLHYEFYQ 239
++K +PD R IS ED S+T I LF +K + EDF + +LK AL HVEF+Q
Sbjct 205 INKGMVPDARLISATEDDFSQTNNEICNQLFKNKTLFSYEDFINFRDELKIALRHYEFHQ 264

Query 240 FVDVE-DETI SAESFAKSLLSCLNYTQASKYSRRIHSLKLEGRVSFKEYVAFHNLIEKAD 298
++V+E +++IS E F KSL+ CL Y +A Y +R+H LKL+G VSFKE++AF I+ D
Sbjct 265 YEVNEENDSISMEDFTKSLMVCLPYKEAHMYIKRVHELKLDGEVVSFKEFLAFQRFIDVD 324

Query 299 IIKMKISTYRFLSLGMFRDLCDDFAKLDPCYNQNKVISDQTATFFKVLDEDENGALEY 358
IK K+ YR+++L + LC +F + D +C + V I+ Q+ ++LD D NG L++
Sbjct 325 HIKEKVLVRYITLDQLKSLCKEFCEDFCKKENVQINPKQVEALVRLDLDGNGQLDH 384

Query 359 DEVVDILEGKKNIGLKEDKFKREMMEKIDRYIKKFQKYVG 399
DEV+ +L+ ++ +G GKE++ K + ++ F++ +G
Sbjct 385 DEVIGLDQRQLLGQGENELKEAIESSFKVQVQFRETIG 425

```

**Supplementary Note Figure 6. Supporting information for +2 frameshifting at GAG\_TAA.** See Supplementary Fig. S8 for the legend.



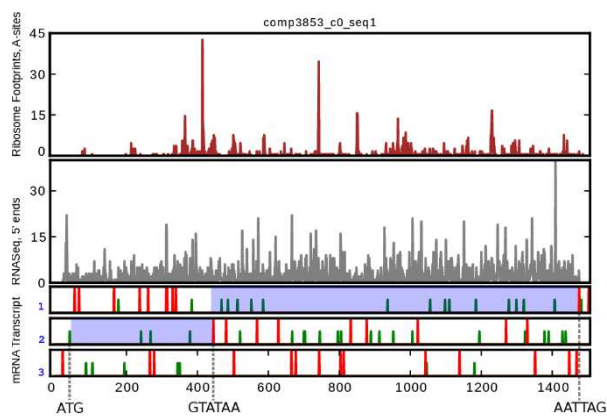

```
>comp3853_c0_seq1_GTATAA(+2)
MSEENKEEVKGTHTDEDQVHHGFGNHFESAIEGALPKHRNNPQQC
KFLYAEIQISGTPFTYPRAKMQRSLYRIMPTVAHPYKALKDYNLMIANFARDDDEEV
FTTPQMRWTPIDLPEEITFVQGIQTVITGAGDPSMKAGINMGVYTCNTSMKNEAFFSS
DGDIMIVPQLGKLSIMTEFGHIEAESWEVVIPRGKFAVEVNEDCRGYYCELYDGHQLI
PDLGPIGTNGSANPRDFAIPKAKYFDETFEVRVQKYLKGFYEYIIPHNIFDIVAHGNY
YPYKYDCHHNTNGSISYDHPDPSVFTVLTCTQTPDHGQAALDFAIFPPRMLSMEDTFRPP
YFHRNTMNEFMGNVAGQYDAKEEGFSPGAVSLHSCMSAHGPEAEVVEKASTCELPKQVQ
EGCLAFMFETCYTMKVTKFSMHDLLEGATDSYSVNSKAVDESVDKWKMKRFLDPNDPD
AGYKKYLSEHKN
```

Homogentisate 1,2-dioxygenase [Oxytricha trifallax]

Sequence ID: gb|EJY66813.1|Length: 439Number of Matches: 1

Related Information

Range: 1 to 435GenPeptGraphics Next Match Previous Match

Alignment statistics for match #1 Score Expect Method Identities Positives Gaps

514 bits(1323) 5e-176 Compositional matrix adjust. 249/442(56%) 314/442(71%) 19/442(4%)

Query 23 GFGNHFESAIEGALPKHRNNPQQCKFLYAEIQISGTPFTYPRAKMQRSLYRIMPTVAH 82

Sbjct 9 GFGNHFEE+E+EGALPK +N+PQ+ GLYAEQ+SGTPFTY R + QRSW YRI PTV H

GFGNHFETESVEGALPKDQNSPKVPHGLYAEQLSGTPFTYARHRNQRSWYRIQPTVLH 68

Query 83 PPKYKALDYNL--WIANFARDDDEEVFTTPQMRWTPIDLPEE-EITFVQGIQTVITGAG 139

P+K + D W+ F +DD + +P Q RW P +P++ ++TF++GIQT+ GAG

Sbjct 69 RPFKPVADQERFKNLITFDKDSR-LHISPAQYRMRPQTIPTDKQVTFIEGIQTMGGAG 127

Query 140 DPSMKAGINMGVYTCNTSMKNEAFFSSDGDIMIVPQLGKLSIMTEFGHIEAESWEVVIP 199

P++K G+ + +Y CN SM+ EAF+SSDGD++IVPQ+G++ +TEFG I E E+VV+

Sbjct 128 GPALKNGLGIHLACNKSMEKEAFYSSDGDLLIVPQVGEILVKTEFGRIYVEPQEIIVVQ 187

Query 200 RGKFAVEVNE-DCRGYYCELYDGHQLIPLDLGPIGTNGSANPRDFAIPKAKYFDETFEVR 258

RGIKF VE+ E RG+ CE+Y H IPDLGPI+NG ANPRDF P A Y D+ E+

Sbjct 188 RGIKFQVELLEGQARGFICEIVKSHFVIPDLGPIGTNGSANPRDFQTPIAWYEDKHEEW 247

Query 259 VIQKYLKGFYEYIIPHNIFDIVAHGNYYPYKYDCHHNTNGSISYDHPDPSVFTVLTCTQ 318

VI K+ G FF+Y + H+ FDIVAHGNY PPKYD +NT+GSIS+DHPDPS+FTVLT Q

Sbjct 248 VINKFQGSFFQYQVTHSPFDIVAHGNYAPKYDLRKYNTIGSISFDHPDPSIFTVLTAQ 307

Query 319 TPDHGQAALDFAIFPPRMLSMEDTFRPPYFHRNTMNEFMGNVAGQYDAKEEGFSPGAVSL 378

T D GQA DF IFPPRML E TFRPPY+HRNTM+EFMGN+ G YDAK E F GA SL

Sbjct 308 TDDPQQAQVDFVIFPPRMLVQEHTFRPPYHRNTMSEFMGNIQGTYDAK-ESFCAGASSL 366

Query 379 HSCMSAHGPEAEVVEKASTCELPKQVGEGLAFMFETCYTMKVTKFSMHDLLEGATDSYS 438

HS MS HGP+AEV +KAS +LKPQ VG ++FMFET Y +K+T Y+

Sbjct 367 HSTMSGHGDAEVFDKASNADLKPQLVGVDSMSFMFETAYMLKLT-----DYA 414

Query 439 VNSKAVDESVDKWKMKRFL 460

VN V YH+CW+ + R F

Sbjct 415 VNEEN-VYTDYHECQKLPREF 435

**Supplementary Note Figure 7. Supporting information for +2 frameshifting at GTA\_TAA.** See Supplementary Fig. S8 for the legend.

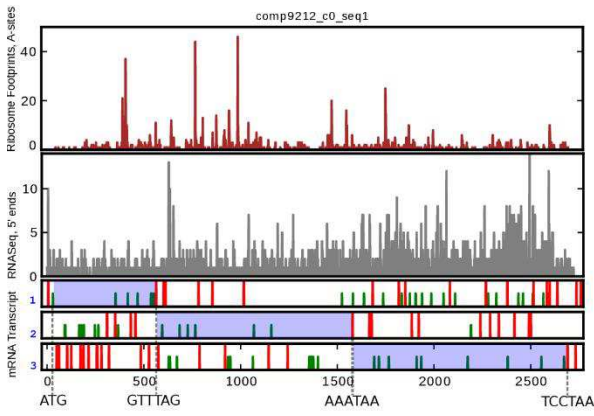

```
>comp9212_c0_seq1_GTTTAG(+1)_AAATAA(+1)
MSGKEEAKSGIKRNTGKGGHDDKHSAPSGQGNICVVCVFRPLNQNELNH
GGSNVCADFHPPNKKSVTIVTEGDVTKNEFTFDRVFDINSSQIEVYNQAAPKPIESVME
GFNGTVFAYGQTGSGKFTFMQGPDIEDIESQGI VPRMVRTVFNRIENSSIEFTVKVSM
MEIYMEKVRDLDLPTKANMKIKVDKHSAYVHDLTERYIGSDLDVYDIMRIGNNNRNVAS
TSMNDQSSRSRHSIFVMTVHQNNLDDQTSKTGILYLDLAGSEKVGKTGASGHTLDEAKGI
NKSLSTLGVINALTDGKSKHIPYRESKLRILSESLGGNARTALITCSPSVYNDMETI
STLRFGTARNIKNPKVKNELTVAEMKLLSKSEKIEVRYRNVKVLGECITELGGEVP
EDEYKDLQLSSKPAPAKEEVEKPEAPSEKPEQDDDDQDEEEKKAIIDELQAKLKRLLQDK
LNIEYTKYCNLTTEFEVSNKLAASQEKCDKLVQVQKLEEFTEKINDLVQTKQKLLL
EEELRNVSNEKLSKLDRIEENGIVLPEMEDGSAHDKRRTAQEAMQKELIRVSQKL
KRISLGLGLSDEVKQILDIEVRHTDEESKEDPDTDEMFKDSLDMHADLSKFKDKLSLIF
LDEEDTKLKSQIELREQQKLDERQKHEFLAQIDSLSELENAAKESMPNIQAITKKLA
DEQIMKAENRAEEKVQLRDLNERNVSKVQLLEISLDEANEKRYRLENTINQCDVPLRKK
INKLENQAEQITIMYHQVVSSEKSLKVDLQVVEKLRKDEKIASLEKALNKLKEGNVAL
KKILRGLKSLKMKANDENRILEGNVVTGIPSSGRVVKPLRGRKDKPARIMSSIQS
```

kinesin motor catalytic domain protein [Tetrahymena thermophila 5B210]  
Sequence ID: gb|EAR95613.3|Length: 916Number of Matches: 1  
Related Information  
Range 1: 8 to 898GenPeptGraphics Next Match Previous Match  
Alignment statistics for match #1 Score Expect Method Identities Positives Gaps  
541 bits(1393) 3e-174 Compositional matrix adjust. 358/939(38%) 538/939(57%) 144/939(15%)

| Query | 30  | GQGNICVVCVFRPLNQNELNHGGSNVCADFHPPNKKSVTIVTEGDG---VTNKNNEFTFDRV | 86  |
|-------|-----|----------------------------------------------------------------|-----|
| Sbjct | 8   | G GNI VVCR RP N++EL GS C +F + +T DG NK F FDRV                  | 66  |
| Query | 87  | FDINSSQIEVYNQAAPKPIESVMEGFNGTVFAYGQTGSGKFTFMQGPDIEDIESQGI VPR  | 146 |
| Sbjct | 67  | F++ ++Q ++Y AAKP+++SV+EGFNGTVFAYGQT SCKTFTMQG I+D + +G++PR     | 126 |
| Query | 147 | MVRTVFNRIENSSIEFTVKVSMMEIYMEKVRDLDLPTKANMKIKVDKHSAYVHDLTE      | 206 |
| Sbjct | 127 | MV+TVF I ++ ++IEF +K+S++EIYMEK+RDLDTK N+ ++ DK + Y+ D+TE       | 186 |
| Query | 207 | RYIGSDLDVYDIMRIGNNNRNVASTSMNDQSSRSRHSIFVMTVHQNNLDDQTSKTGILYLV  | 266 |
| Sbjct | 187 | +Y+ ++ DV+D++RIGN NR V +T+MN+ SSRSH +F+M+V QNNL+D ++KTG L LV   | 246 |
| Query | 267 | DLAGSEKVGKTGASGHTLDEAKGINKSLSTLGVINALTDGKSKHIPYRESKLRILSE      | 326 |
| Sbjct | 247 | DLAGSEKV KTA G LDEAK IN+SLS+LG VINALTDGKS HIPYR SKLTR+L ES     | 306 |
| Query | 327 | LGGNARTALITCSPSVYNDMETISTLRFGTARNIKNPKVKNELTVAEMKLLSKSEK       | 386 |
| Sbjct | 307 | +GGN++T LI+TCSPTS +ND+ET+STLRFG A+ IKNK KVN+E+TVAE++ LL+K EK   | 366 |
| Query | 387 | IIEVRYRNVKVLGECITELGGEVP-EDEYKDLQLSSKPAPAKEEVEK-PAPSKPEQDDD    | 444 |
| Sbjct | 367 | +E + RV LE I +LG ++P E + ++ ++EE+ + PA E+                      | 426 |

Supplementary Note Figure 8. Supporting information for +1 frameshifting at GTT\_TAA. See Supplementary Fig. S8 for the legend.

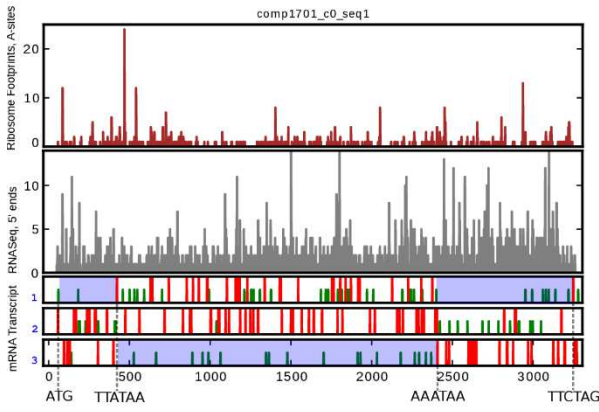

```
>comp1701_c0_seq1_TTATAA(+2)_AAATAA
MAKYEYFIKRTSKSSQIYYKIIPASSQCAQKGLNIEIGSG
LMHEYFEDSESSYFSDGKLIYGLVGLIHIYPTSYLVVISELNDKSVLRVDGKEIYEIKK
VEILSLSGKKKPKNKSYEDGLISKLLSSGFYFSYELDTRRLQRKGDDRYWNRNMYEDF
KTYGISSSWAIKLIQCVYVYSKIIVNSANLELTLISRRRTGMAGTRYSRRGIDDEGNTAN
FVETEILKFEDYILSFVQIRGSVPFWEQTGISADLNLTRLELDRQAFDKHFNDMIGE
YGKLVWANLLNKKRSYEMKLIIRFEELVKMYAGSNRVLVFNHFQECCKNFVMEQKLLK
-----
CLKGHDKRVEALKSHAEDALDDLPEAGYKFSQSPMVGLLIMVFAKENLIGRITDVCV
TKVKSFGGNGVGNKGGVMVRFELDNTSICFCAHLESGQKKEKERRQNLKEVVEGSDK
PSRYNFMNHDKIFFGDLNFRINLPYDDVIGIIDDMEYKDDKMSILLNNDQLNQCRRM
YSWLHYKEMPIKFLPTYKYDKIKSDTYDTSKRRRVPAAWTRILWYHNEEESKDKGSQYI
SPILYERRETNFSDHRPVVAYFEIHAHRHCSEKAKIKNTIASKKATSFIVKPKSPDAE
TQVKKEFGDDFLFSSPPKKEQHIHLNLNRAHPKTEEVKRPVTPNKDPLDQLQFDN
NLIDIREKKQDDGNLIDFSKTRQMPHPGHRFYPHAHSMHGRNPVYIQGPIQGVHNGFG
MQNHFPMTYKPNPFGFFNSNTGKGRMRASVPRKPSADLIGKAAPNVPQKAMPRTTEEF
FKF
```

endonuclease exonuclease phosphatase family protein [Stylonychia lemnae]

Sequence ID: emb|CDW87399.1|Length: 878Number of Matches: 1

Related Information

Range 1: 45 to 842GenPeptGraphics Next Match Previous Match

Alignment statistics for match #1 Score Expect Method Identities Positives Gaps

526 bits(1356) 4e-167 Compositional matrix adjust. 317/823(39%) 459/823(55%) 51/823(6%)

```
Query 61 IYGLVGLIHIYPTSYLVVISELNDKSVLRVDGKEIYEIKKVEILSLSGKKKPKN-KSYED 119
I G+LG+L+I +++VVI+E + ++DG I+ IK V+++ +++ D
Sbjct 45 ISGLLGLVLIQQGNFIVVITE--KQMIQKIDGANIFTIKNVDLIPFGDDHSVNQIRNFID 102

Query 120 GLSKLLSSGFYFSYELDTRRLQRG-----KG-----DDRYWNRNMYEDFK 161
G+ KLL+ GFYFSY D+T QR KG D RY+WN N+ +DF
Sbjct 103 GVKLLTLGIFYSYNTDITSNRQRSANLRNKGMMGGDSQSIWEQCDKRYVFWNFICQDFL 162

Query 162 TYGISSSWAIKLIQCVYVYSKIIVNSANLELTLISRRRTGMAGTRYSRRGIDDEGNTANF 221
+ W + +IQCVY YS I + LE+ LISRRR M+GTRY+ RG+DD+GN AN+
Sbjct 163 YQKVDPRWIVPIIQGYVEYSQIFDQKLEILLISRRRFAMSGTRYNARGLDDGNVANY 222

Query 222 VETEILKFEDYILSFVQIRGSVPFWEQTGISADLNLTRLELDRQAFDKHFNDMIGEY 281
VETEIQ+ + ++I SFVQIRGSVP FW+Q GI A + + R L QAFDKH NDM+ +Y
Sbjct 223 VETEIMSYRNFYISFVQIRGSVPLFWQKGIQAHTSIKRDETLTSQAFDKHLNDMVNDY 282

Query 637 DVCSTKVKSGFGGNGVGNKGGVMVRFELDNTSICFCAHLESGQKKEKERRQNLKEVVEG 696
+ ++KVK+FGGG GNKG V +RF DN+S F HL SQK+ ER ++++E+ +
Sbjct 632 SIRTskvktgfggqsgnkgsvairfnfdnsfafinchltsgqkqvserledireiykks 691

Query 697 FSDKPSRYNFM--NHDVKIFFGDLNFRINLPYDDVIGIIDDMEYKDDKMSILLNNDQL 754
F +FM +HD K FGDNFRILPY+ V D++ + N L + DQL
Sbjct 692 FDCSQKFQDFMIQSHDYKFI FGDNFRISLPYETV---KDEIRKRN---YPYLQSKDQL 744

Query 755 NQCRMDYSWLHYKEMPIKFLPTYKYDKKSDTYDTSKRRRVPAAWTRILWYHNEEESKDK 814
+ S L + E + F PTKYVD S+TYDTS+K R PAW DRIL+ E+S+
Sbjct 745 LSVKQNSILNRFSEGLDFDPTKYVDHSNTYDTSQKLRTPAWCDRILY---EKSQKC 800
```

Supplementary Note Figure 9. Supporting information for +2 frameshifting at TTA\_TAA. See Supplementary Fig. S8 for the legend.

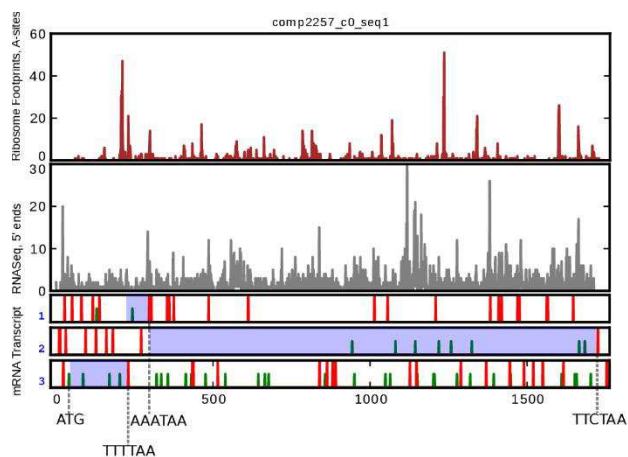

```
>comp2257_c0_seq1_TTTTAA(+1)_AAATAA(+1)
MNLLEDDTYFDQLGMQGNKAYEKIFDFANEPVVFSDTAIKINMWGI
KQERILLMTTKNIFNFKRKSMMRRIAIEKIGAIISTKINSKELVLHVPSEYDRIYQIND
REVFIKLLKREFVKKRPNGLRYYVVKGLKEVTTTEKDAKYKISRLPSELRLDQEVY
GPEYQEEESKTPTESTVAATSFDTKLKAVESRQKQASLEDTEEPDADFTRNSVCVFSH
KEEEKVTLSDFEVKGVIGRGTFGKVLVRLKTTDTLYAIKSLRKDVLVEAQIENVKLE
KEILLACNHPFLAGMEYVFQNDTRLVYVIEFLKGGELYKHFLLKRRFEDEAKFYATQIA
MAIGHLHKQNLHRDLKLENIMINGDGYIKVIDFGLAKIIDDDNLAMSFSGTPEYLAPEM
VKQGHDRGVDWMSLGLIYEMTIGVTPFFSKSRLTLINNIKEDVIFPGKYKIEYSDD
FVDVVLKLLNKDSKRLGSDGIDEVLEHPYFQSLDLEALVNKEIKPPYIPEFTGKDDLQ
SYIKLKSQKVDNMTIPSSKMRKIKKHETDFKNF
```

Protein kinase domain containing protein [Oxytricha trifallax]  
 Sequence ID: gb|EJ72937.1|Length: 553Number of Matches: 1  
 Related Information

Range 1: 23 to 553GenPeptGraphics Next Match Previous Match  
 Alignment statistics for match #1 Score Expect Method Identitles Positives Gaps  
 408 bits(1049) 6e-132 Compositional matrix adjust. 221/545(41%) 349/545(64%) 24/545(4%)

```
Query 27 DFANEPVVFSDTAIKINMWGIKQERILLMTTKNIFNFKRKSMMRRIAIEKIGAIIS-TK 85
+++E+++S+KN+QERI+++T+IFNKK++R+IAIEK++S++
Sbjct 23 EISDELIIYSNRVKKFNRFQWQERIMVITDRRIFNVKQKIQRAIAIEKLLGVTKLSLSE 82
```

```
Query 86 NSKELVLHVPSEYDRIYQINDREVFIKLLKREF--VKRPNGLRYYVVKG-SLKEVTTT 142
+EVLHV EYDVR++R+I++++FV+P L+YVK+L ETT+
Sbjct 83 SNGEFLVHKVEYDVRMRSDTRDQIIEIRKLFISVCGKP---LPFYGVKPKALSEFTTS 139
```

```
Query 143 EKDAKYKISRLPSELRLDQEVYQEEESKTPTESTVA--ATSFDTKLKAVESRQK 200
+KD K+SR+P R+D+ ++T++F+++S
Sbjct 140 KKDLKKGLSRIPLELARIKDEG-----DNSTDMQFNLGDDTEDFSNOHEERTSSYH 190
```

```
Query 201 DASLED--TDEEPDADFTRNSVCVFSHKEEEKVTLSDFEVKGVIGRGTFGKVLVRLK 258
S+D D+E R K+++TLDFVKVIG+G+FGKVF+V
Sbjct 191 QNSIPDFSVDKESQILQGREKSSSTLYSKRRDQETLLDDFTVKVIGQGSFGKVFVHVHN 250
```

```
Query 259 TDTLYAIKSLRKDVLVEAQIENVKLEKEILLACNHPFLAGMEYVFQNDTRLVYVIEFL 318
T+YA+KS+RKDV+++Q+EN++LEK I+L HPF+ MEYVFQ D R+YF+++F+
Sbjct 251 ATGNIYAMKSIKRDVVIDSEQLNLRLEKHIMLCVEHPFIISMAYVFQDRYRIVFLMDFI 310
```

```
Query 319 KGGELYKHFLLKRRFEDEAKFYATQIAMAIHGLHKQNLHRDLKLENIMINGDGYIKVI 378
KGGELY+ K+R+E+AKFYA+Q+A+A+G+LHK I++RDLK ENI+IN DGYIK+
Sbjct 311 KGGELYQLAKKRLDEYQAKFYASQVALALGYLHKSRIIYRDLKPENILINKDGYIKLA 370
```

```
Query 379 DFGLAKIIDDDNLAMSFSGTPEYLAPEMVKQGHDRGVDWMSLGLIYEMTIGVTPFFSK 438
DFGLAK+++A SFCGTPEYL+PEM+ GHD +DWM+LGIL+YEM IG+ PF+++
Sbjct 371 DFGLAKML-GEQVANSFCGTPEYLSPEMITGTGHDHTIDWMTLGLIVYEMIIIGIPPFYVQ 429
```

```
Query 439 SRLTLINNIKEDVIFPG-KKYKIEYSDDFVDVVLKLLNKDSKRLGSDGIDEVLEHPY 497
++ ++I+ ++P +K+ E S++ D++ KLL KD KRLG ++E++ HP+
Sbjct 430 NKHQMYHLIENGPIRNPTMEKHGFISEESKDLISKLEKDKKRLGRVNGVEEIIISHPH 489
```

Supplementary Note Figure 10. Supporting information for +1 frameshifting at TTT\_TAA. See Supplementary Fig. S8 for the legend.

## SUPPLEMENTARY NOTE 4. IGV screenshots of ribo-seq reads alignments in the vicinity of selected frameshifting sites

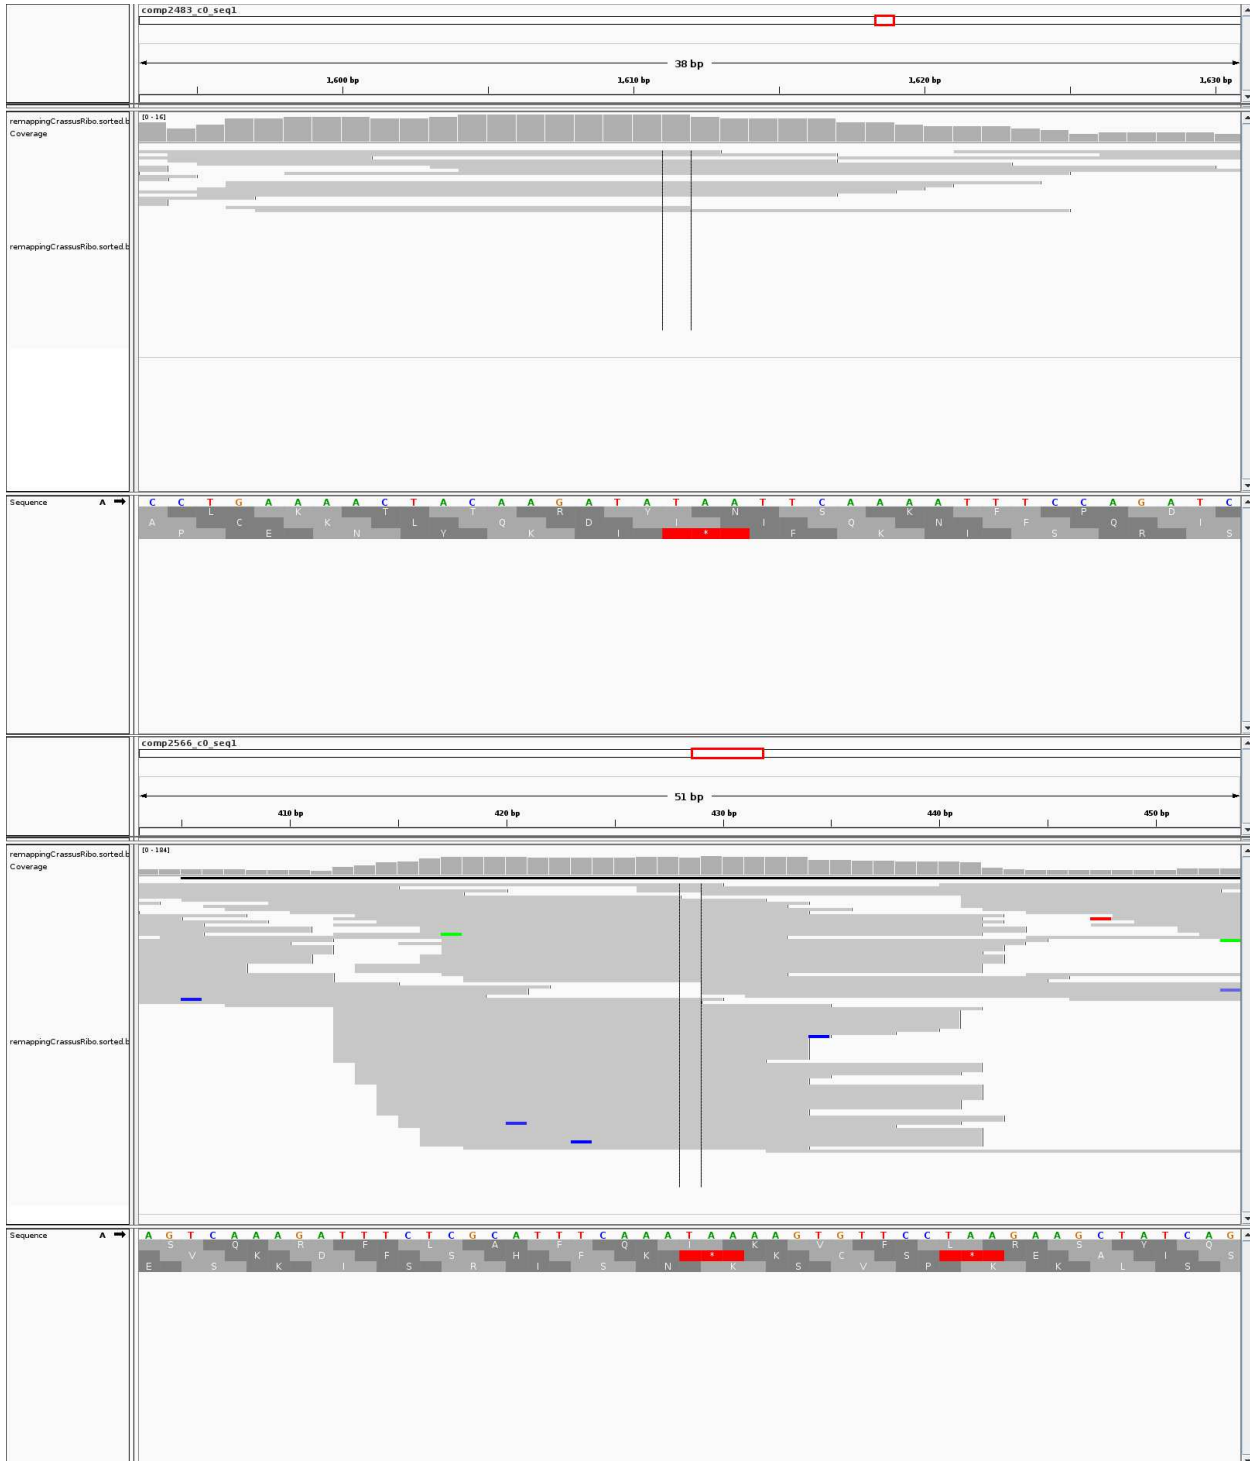

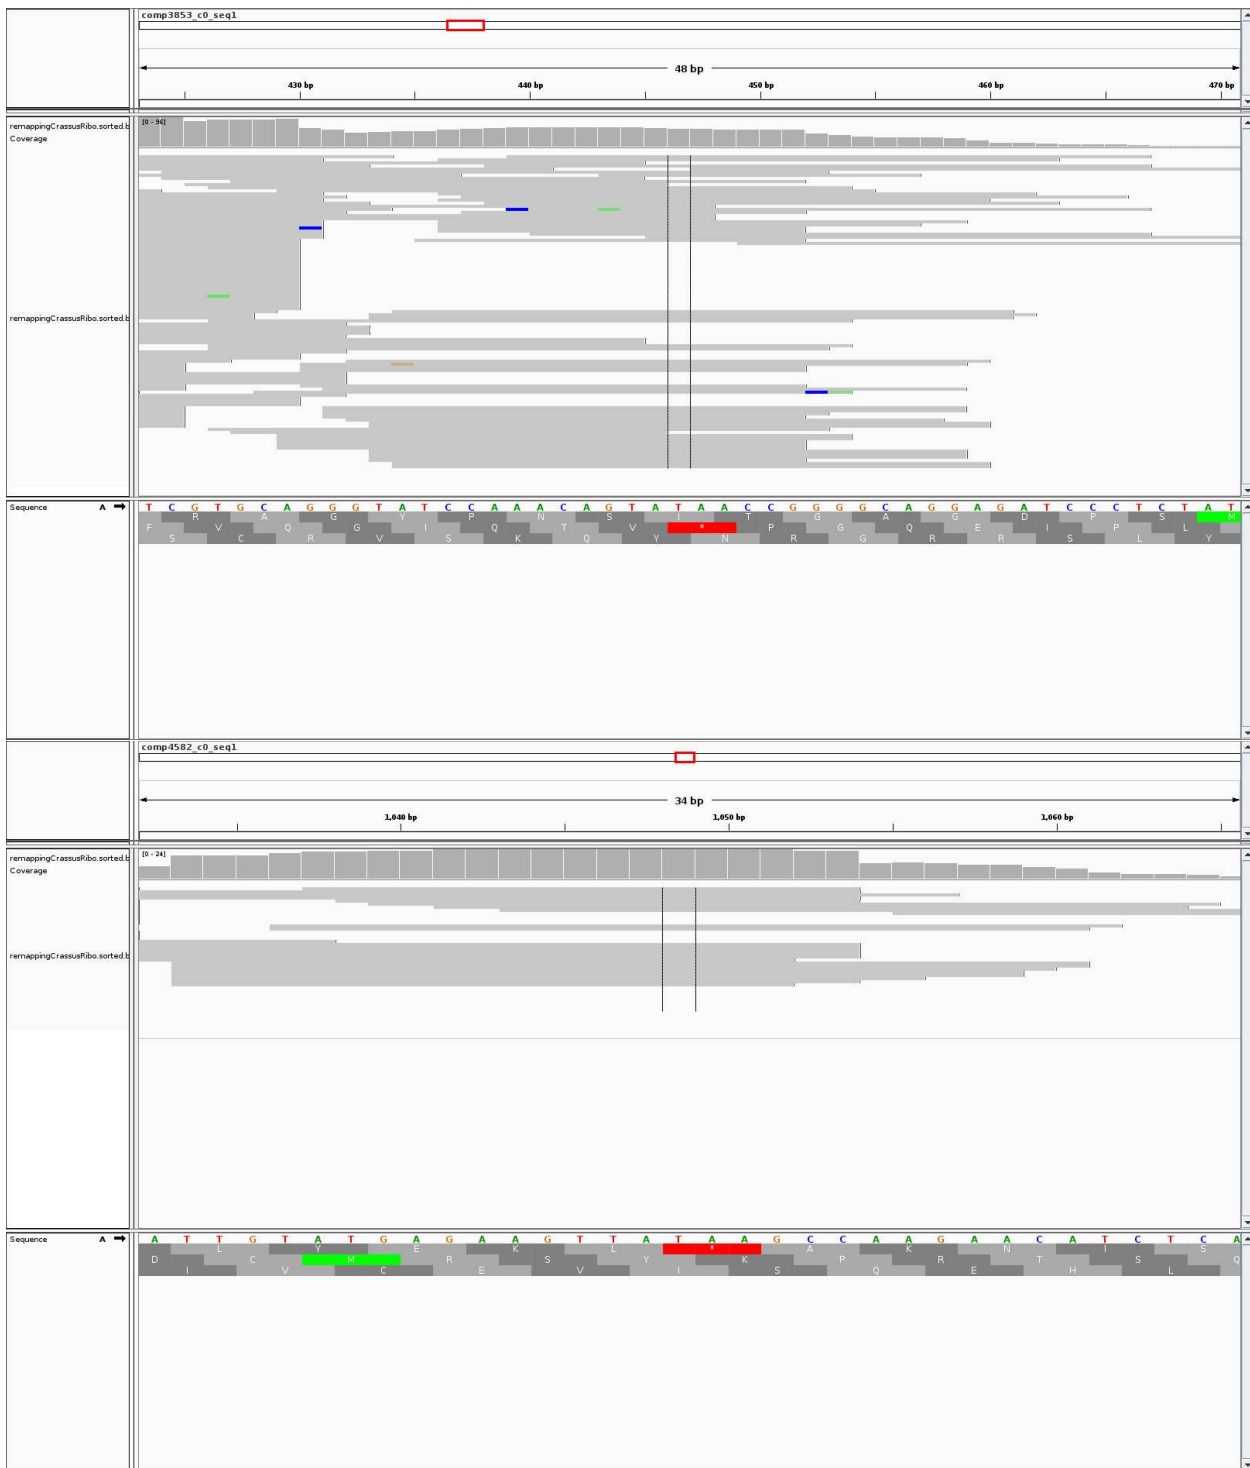

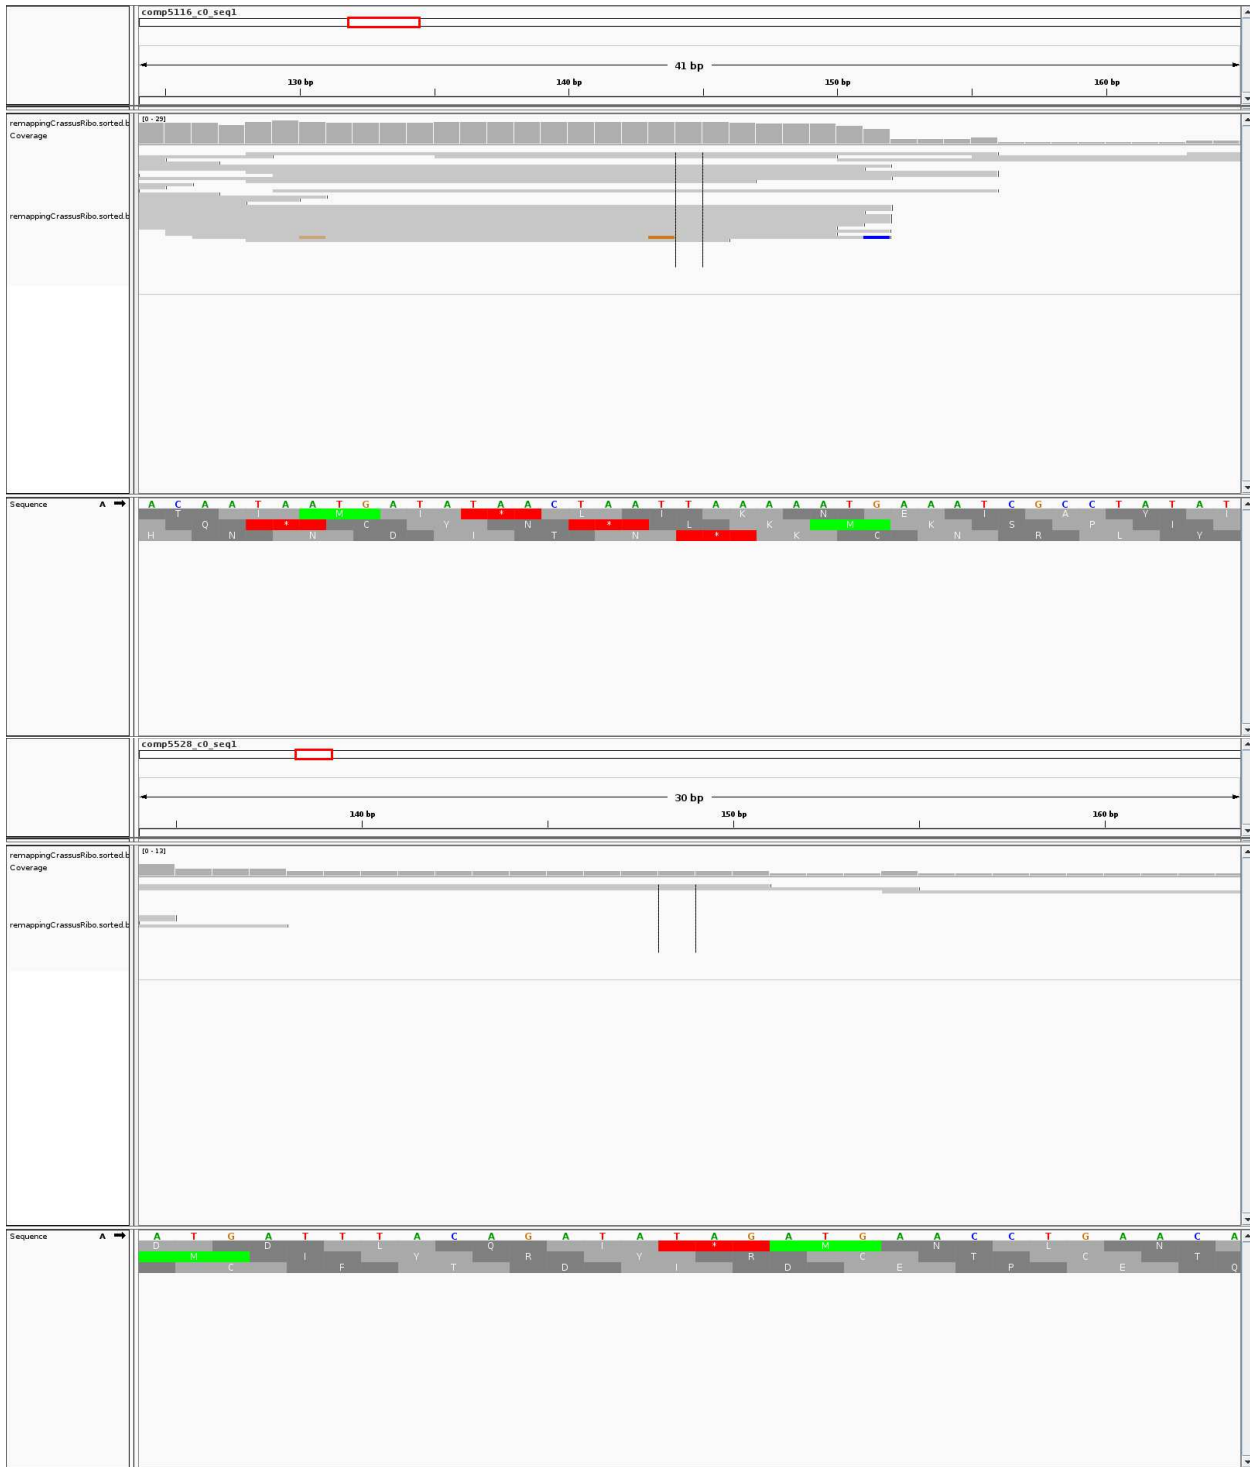

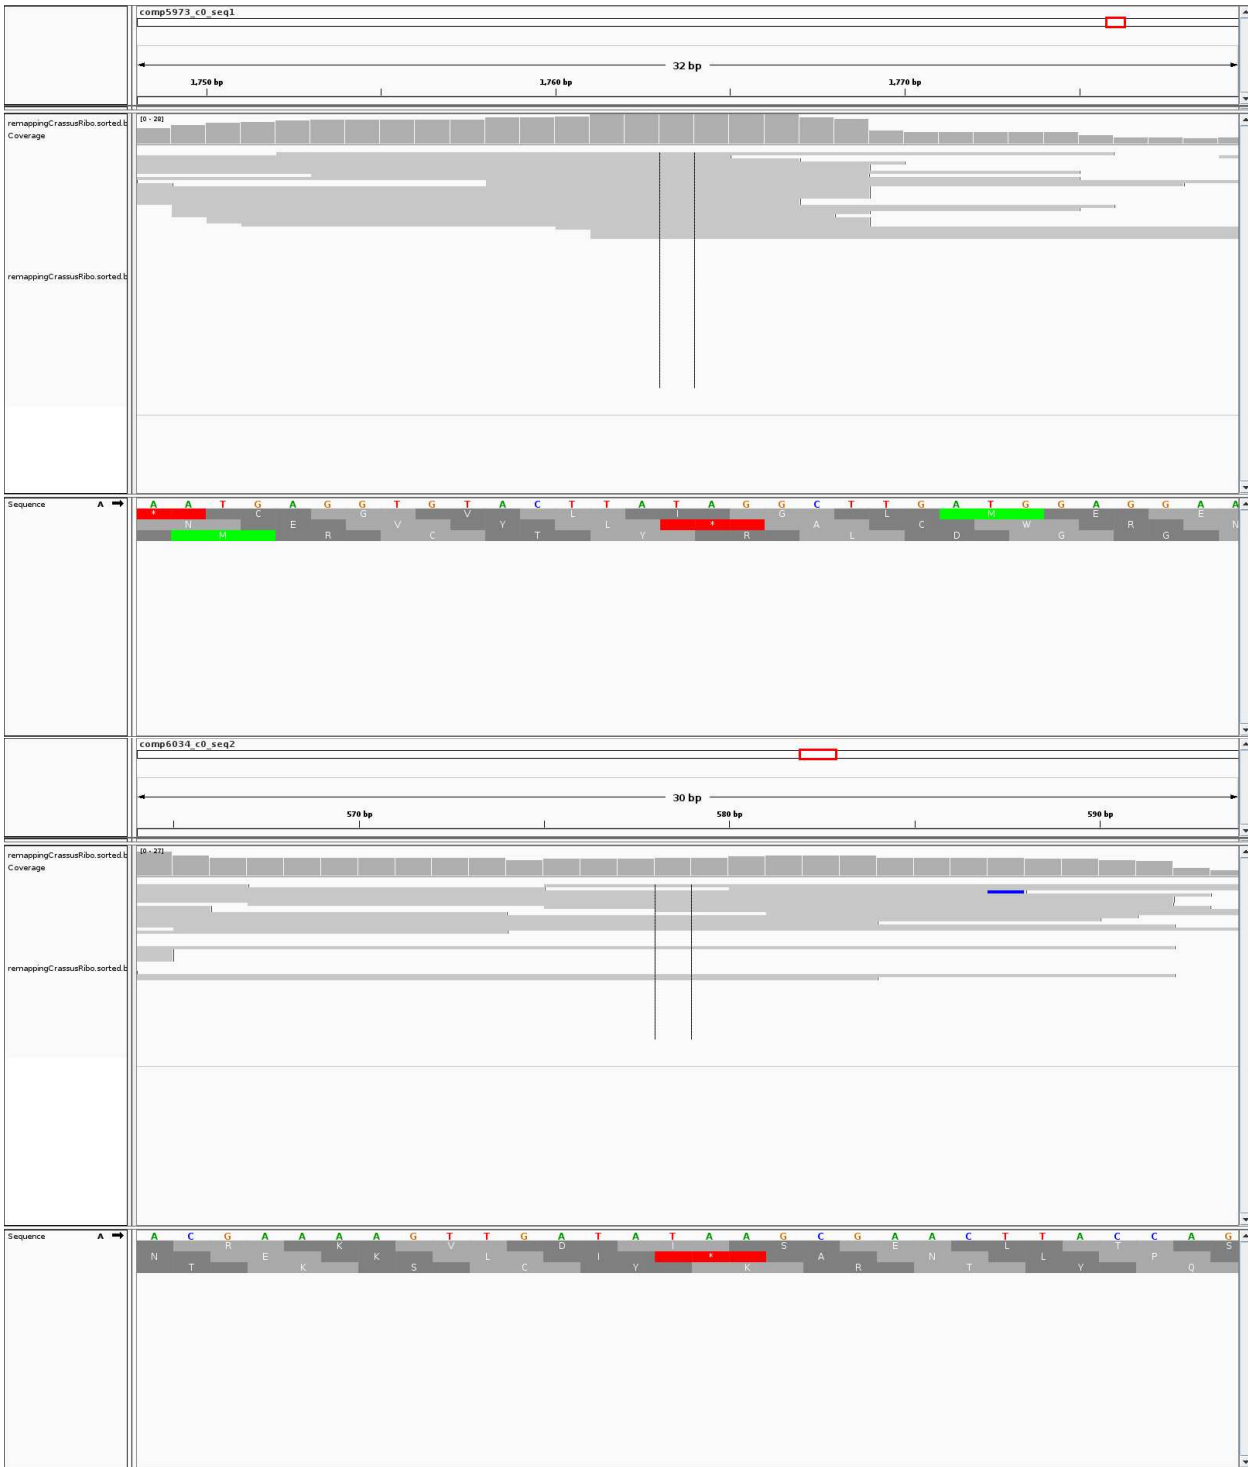



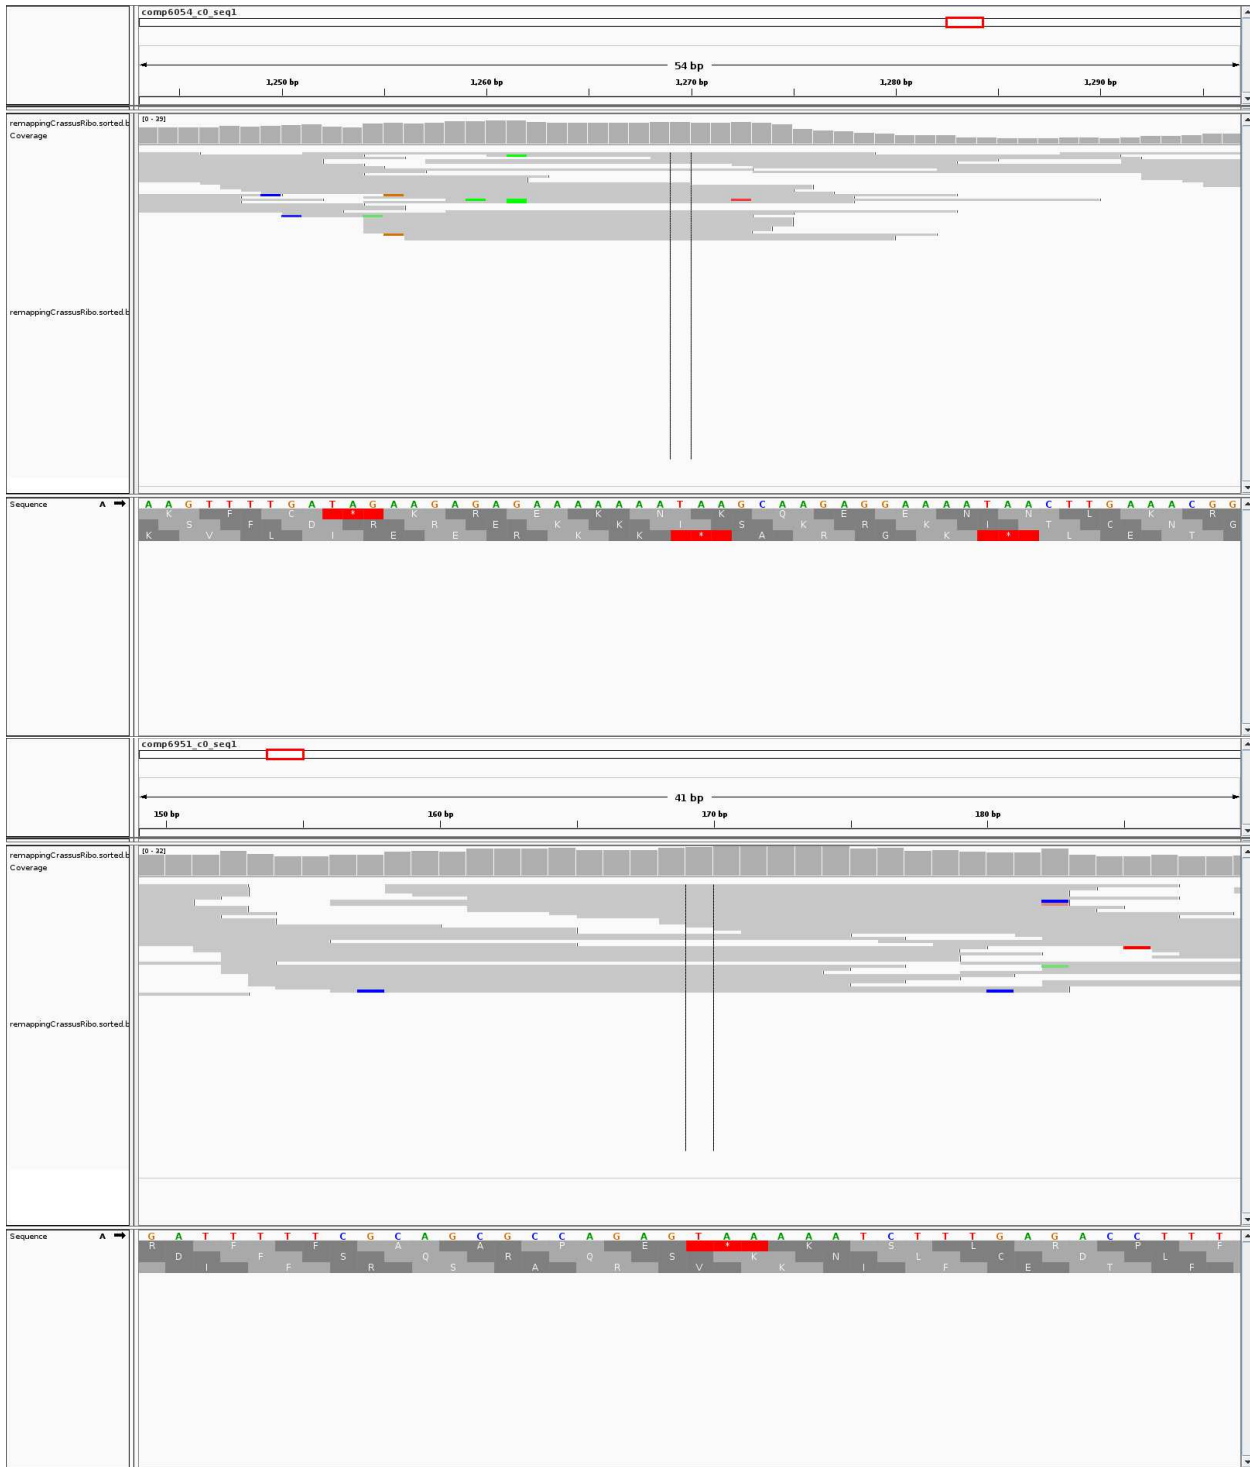

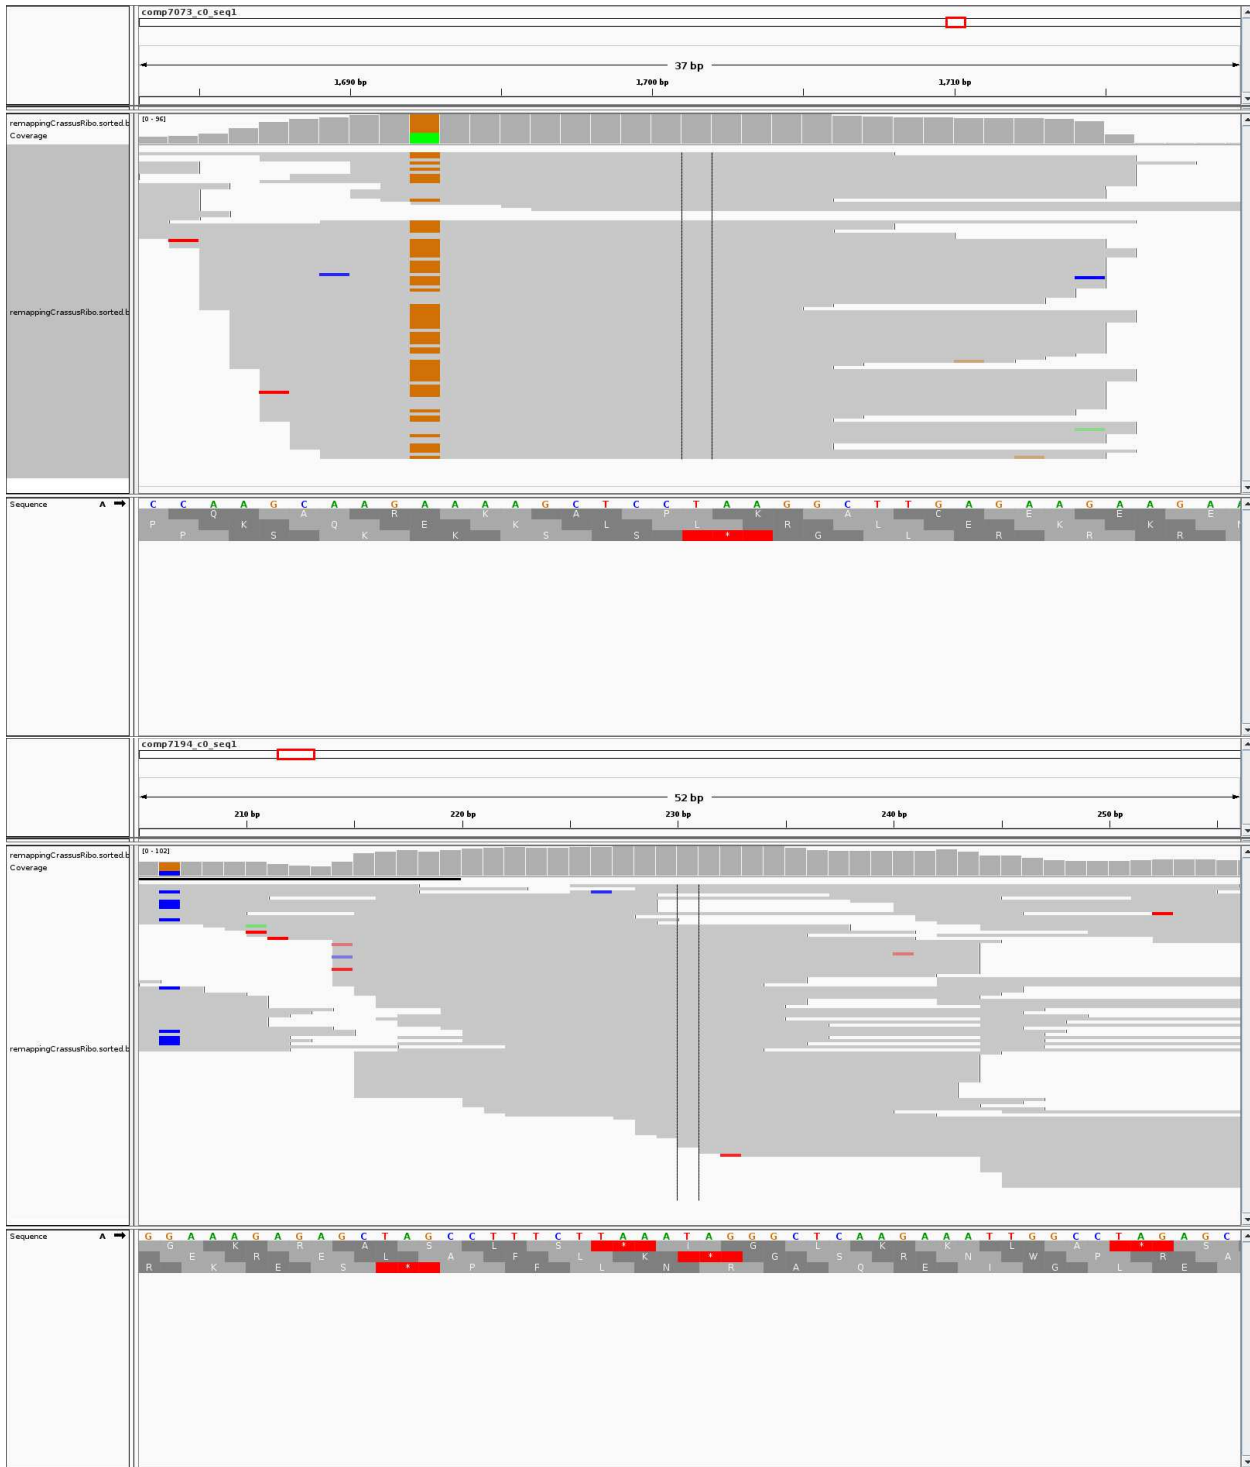

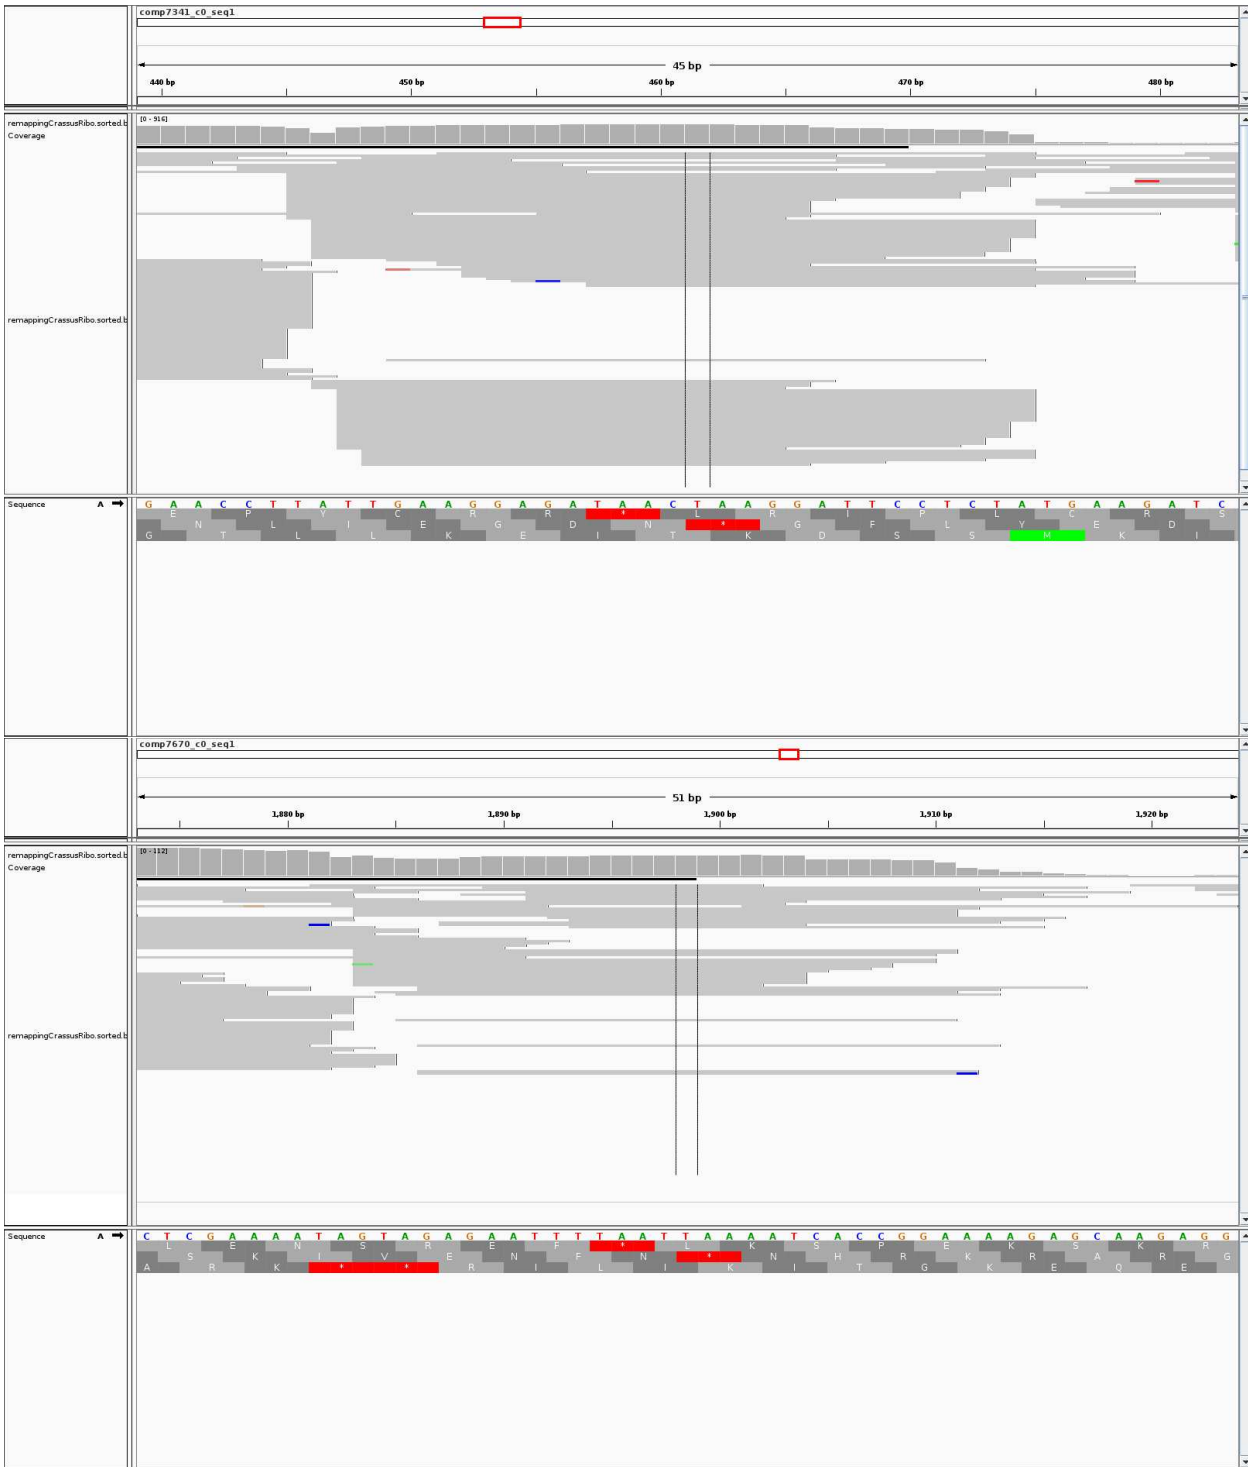

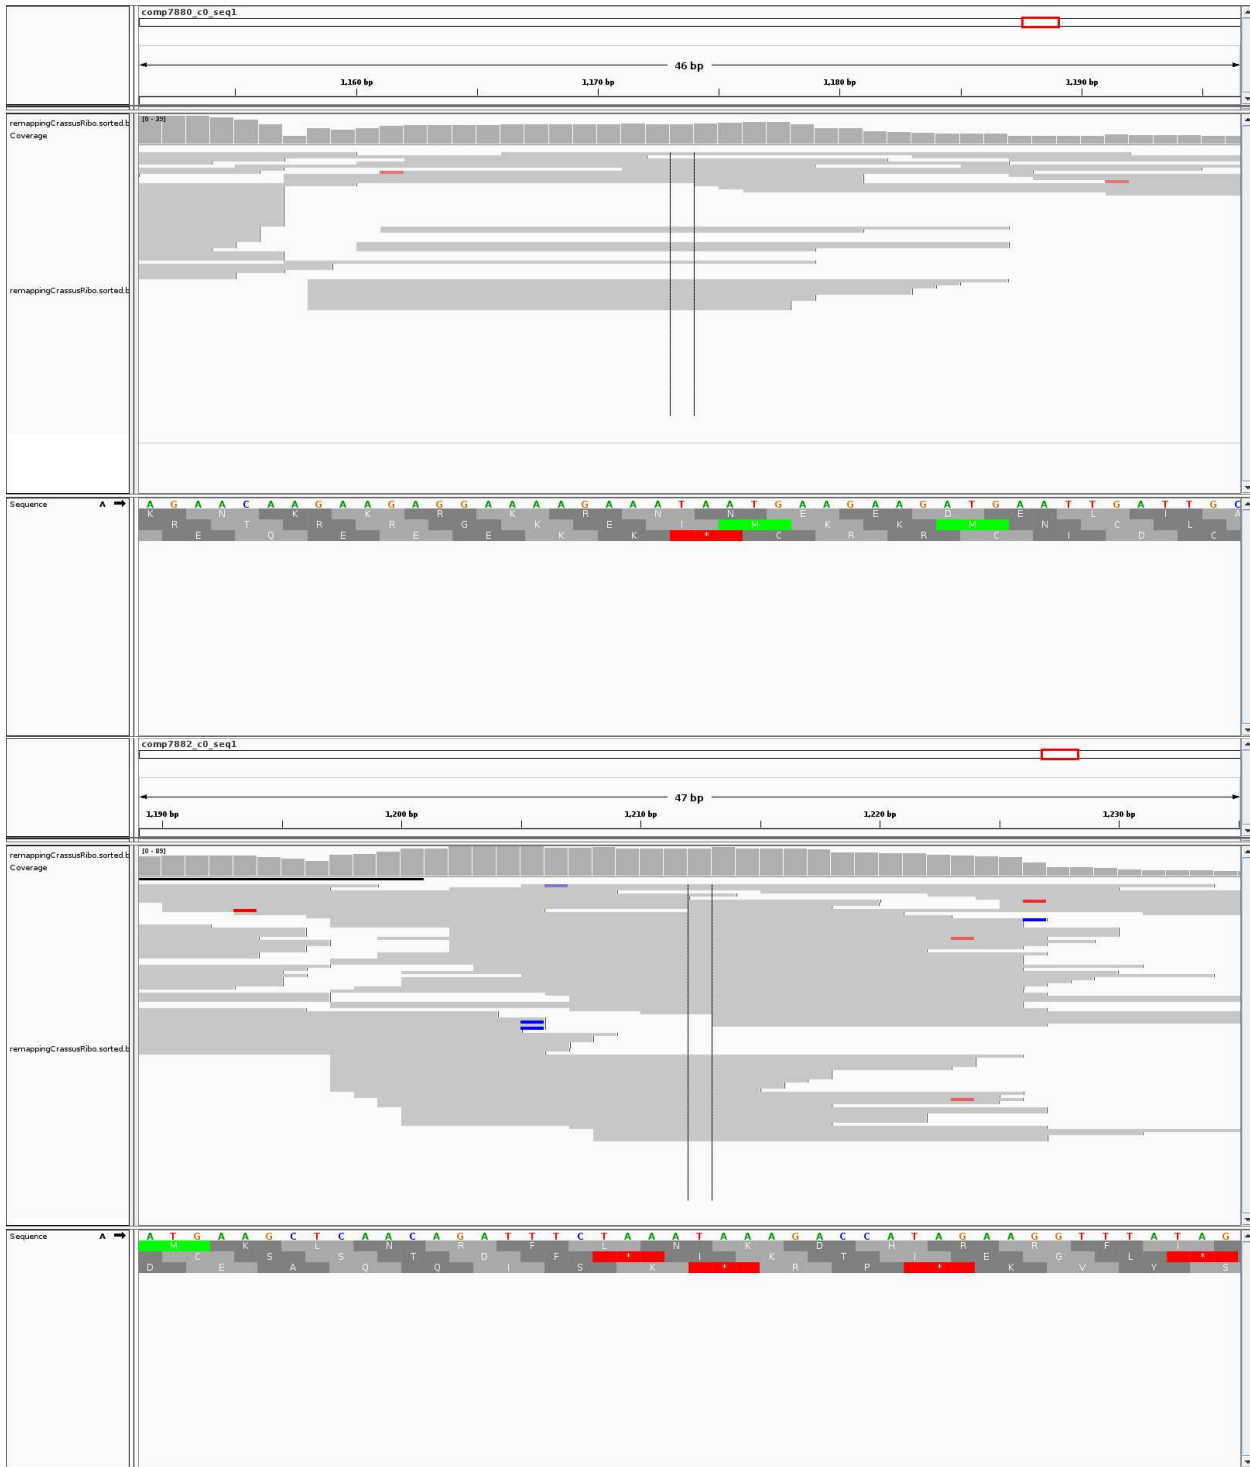

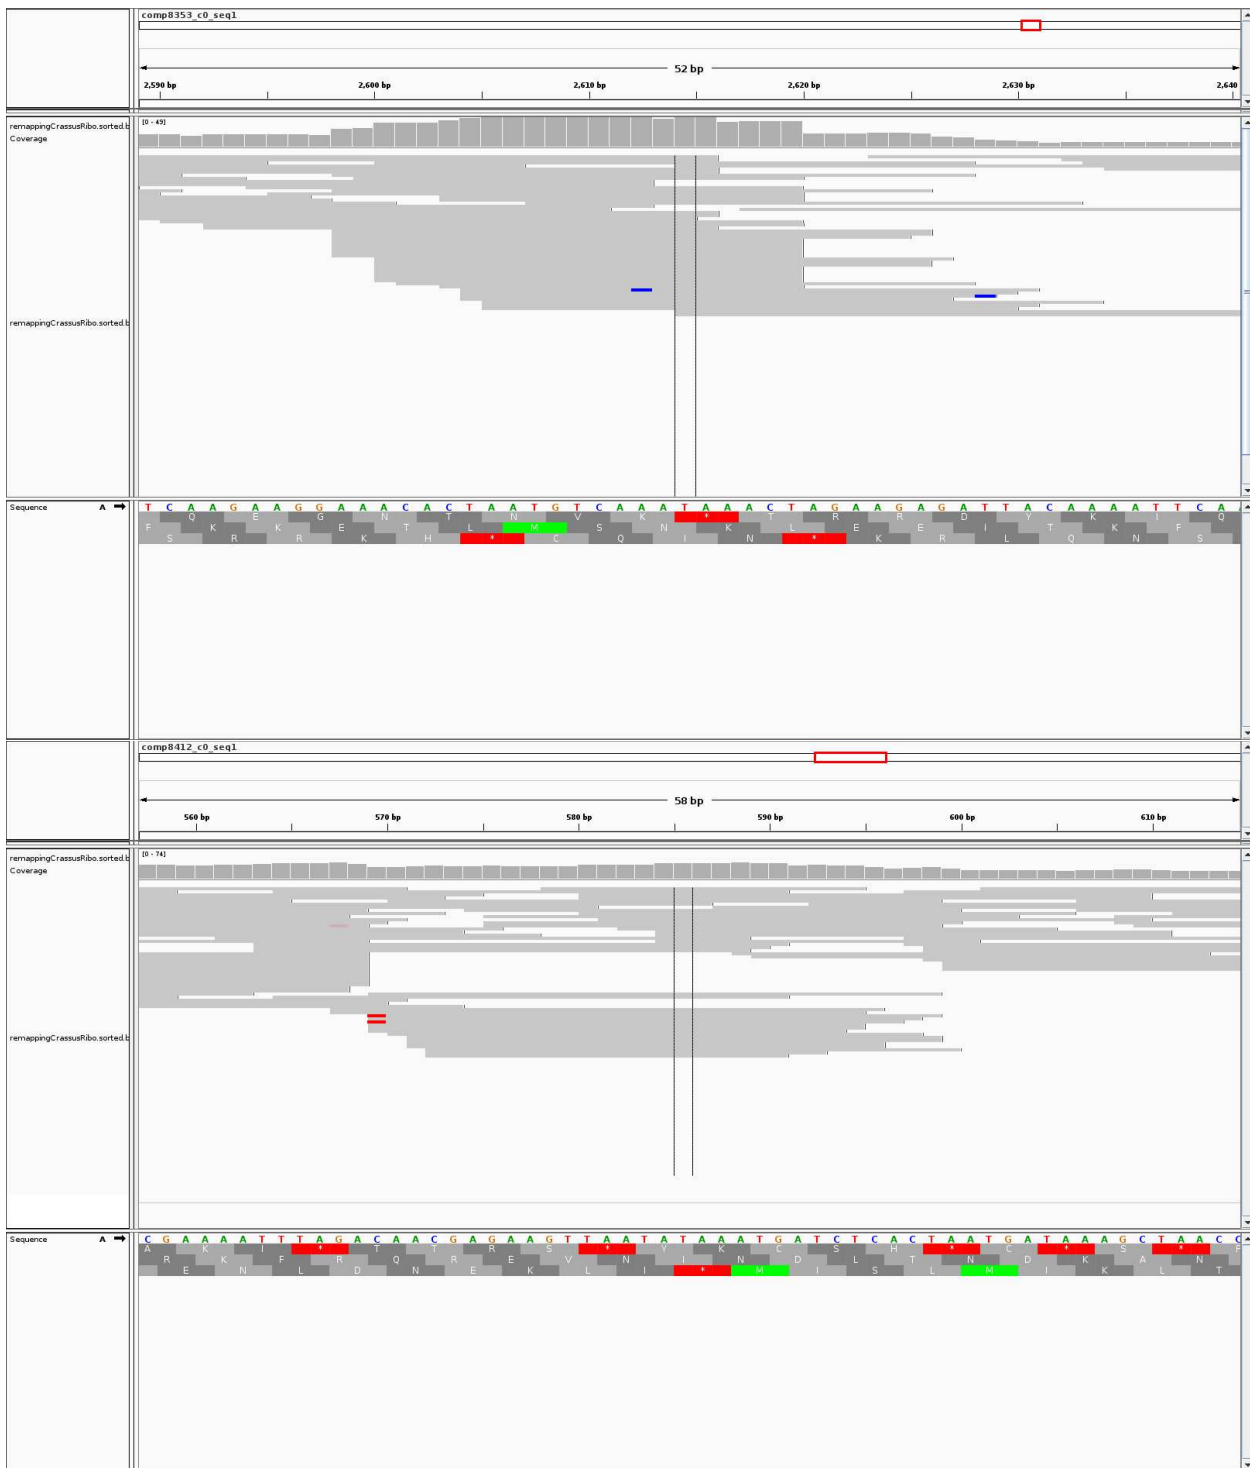

Supplement: NIHMS827235-supplement-1.pdf [file NIHMS827235-supplement-1.pdf]
